# Supplementary material
Source: PubMed Central journal article supplement (PMC2536824)
Supplement: 90225.2008_3.pdf [file 90225.2008_3.pdf]

Genes changes common to Arg, Gly and AC5 vs NTG

| Geno (*S)    | NTG        |            | AC5        |            | GLY       |            | ARG       |            | Common    | Genbank       | Gene Symbol  |
|--------------|------------|------------|------------|------------|-----------|------------|-----------|------------|-----------|---------------|--------------|
|              | Systematic | Normalized | Raw        | Normalized | Raw       | Normalized | Raw       | Normalized |           |               |              |
| 1435041_at   |            | 0.9793791  | 6.2609687  | 0.767754   | 5.9097457 | 0.7656221  | 5.9057336 | 0.73132706 | 5.8396177 | Myf6          | NM_010860    |
| 1456090_at   |            | 1.0112445  | 9.352719   | 0.8236691  | 9.056725  | 0.811514   | 9.0352745 | 0.78118443 | 8.980322  | Pdhx          | NM_175094    |
| 1435712_a_at |            | 1.0155295  | 11.605221  | 1.0993348  | 11.71962  | 1.154467   | 11.790216 | 1.1432043  | 11.776072 | Rps18         | NM_011296    |
| 1448411_at   |            | 0.9647319  | 8.982203   | 1.258167   | 9.365325  | 1.1599596  | 9.248076  | 1.127416   | 9.207022  | Wfs1          | NM_011716    |
| 1423554_at   |            | 0.9630538  | 6.1473417  | 1.240678   | 6.512782  | 1.124678   | 6.3711653 | 1.1861035  | 6.447883  | Ggcx          | NM_019802    |
| 1447827_x_at |            | 0.98325133 | 7.212373   | 0.9093383  | 7.099629  | 0.868497   | 7.033333  | 0.895508   | 7.0775185 | Spop          | NM_025287    |
| 1452153_at   |            | 0.99816287 | 7.6517444  | 0.89431775 | 7.4932566 | 0.85793567 | 7.4333386 | 0.8719382  | 7.456695  | Fbxo18        | NM_015792    |
| 1439444_x_at |            | 1.0170037  | 7.291654   | 1.3426162  | 7.692376  | 1.239718   | 7.577341  | 1.2663969  | 7.6080594 | Tmed10        | NM_026775    |
| 1451117_a_at |            | 1.0257596  | 6.1271853  | 0.86822593 | 5.886635  | 0.8551534  | 5.864748  | 0.8222234  | 5.808095  | Tom11         | XM_126629    |
| 1424365_at   |            | 1.0267032  | 9.568103   | 0.9014178  | 9.380351  | 0.86372495 | 9.3187275 | 0.8844325  | 9.352908  | 1810037117Rik | NM_024461    |
| 1453467_s_at |            | 1.0339174  | 11.838137  | 1.1178116  | 11.950691 | 1.0980535  | 11.924963 | 1.1486697  | 11.989979 | Rps15a        | NM_170669    |
| 1433634_at   |            | 1.0226552  | 8.92001    | 1.4000896  | 9.373209  | 1.3797997  | 9.35215   | 1.4550139  | 9.428723  | Irf2bp2       | XM_284454    |
| 1423573_at   |            | 0.99540985 | 6.5359454  | 1.2404122  | 6.853403  | 1.2653289  | 6.8820953 | 1.337721   | 6.9623604 | Srd5a2l       | NM_020611    |
| 1442537_at   |            | 1.0459355  | 7.431274   | 1.3032366  | 7.7485795 | 1.3169719  | 7.763705  | 1.3001673  | 7.7451773 | ---           | ---          |
| 1424172_at   |            | 1.0255543  | 8.499458   | 1.1757432  | 8.696628  | 1.2834662  | 8.8231    | 1.2213364  | 8.751514  | Hagh          | NM_024284    |
| 1444728_at   |            | 0.98516097 | 6.558097   | 1.1687708  | 6.8546476 | 1.1838344  | 6.8731227 | 1.3070337  | 7.0159516 | Sec81         | AI426381     |
| 1423395_at   |            | 0.97065485 | 8.336278   | 0.75149816 | 7.9670887 | 0.7274888  | 7.920244  | 0.7981476  | 8.053974  | Tsnax         | NM_016909    |
| 1424564_at   |            | 0.9342269  | 7.5261416  | 0.9039822  | 7.3319554 | 0.88530153 | 7.30183   | 0.85218674 | 7.2468305 | 2410001C21Rik | NM_025542    |
| 1460203_at   |            | 0.9302813  | 6.427308   | 0.7891021  | 6.1898527 | 0.73068815 | 6.078897  | 0.7495967  | 6.1157556 | Itp1r         | NM_010585    |
| 1451994_s_at |            | 1.0238239  | 7.846146   | 0.7685677  | 7.4324226 | 0.6981192  | 7.293724  | 0.7570647  | 7.410667  | 3930401K13Rik | NM_028720    |
| 1426952_at   |            | 0.95838195 | 6.563334   | 0.69476014 | 6.099248  | 0.6712285  | 6.049537  | 0.62422156 | 5.944792  | Arhgap18      | NM_176837    |
| 1423111_at   |            | 1.0046331  | 12.880917  | 0.90492684 | 12.730122 | 0.8815082  | 12.692295 | 0.86190885 | 12.659856 | Atp5a1        | NM_007505    |
| 1439187_at   |            | 0.9921415  | 7.7242646  | 0.8801447  | 7.551459  | 0.8841982  | 7.5580883 | 0.85328144 | 7.506774  | Vps13d        | XM_620123    |
| 1418518_at   |            | 0.97208965 | 7.239826   | 1.1505792  | 7.483025  | 1.2878498  | 7.645629  | 1.25615    | 7.609673  | Furin         | NM_011046    |
| 1448914_a_at |            | 0.99843174 | 6.9187727  | 0.8054863  | 6.6089687 | 0.8011197  | 6.6011267 | 0.740638   | 6.4878774 | Csf1          | NM_027778    |
| 1445512_at   |            | 0.93434453 | 6.28491    | 1.0959529  | 6.51507   | 1.2395936  | 6.692751  | 1.1399546  | 6.5718603 | ---           | C78040       |
| 1452916_at   |            | 0.9801562  | 6.439806   | 0.84991455 | 6.2341123 | 0.79200834 | 6.1323104 | 0.8080332  | 6.161209  | Wbp7          | NM_029274    |
| 1424251_a_at |            | 0.9952403  | 10.585409  | 0.684417   | 10.04524  | 0.62538445 | 9.915107  | 0.68766904 | 10.052078 | Hnrpd1        | NM_016690    |
| 1452255_at   |            | 0.9892236  | 7.3978744  | 0.8994054  | 7.2605495 | 0.8688397  | 7.2106676 | 0.8651352  | 7.204053  | Fbxo38        | NM_134136    |
| 1430585_at   |            | 1.0226244  | 5.6448584  | 1.2274865  | 5.9082894 | 1.3608584  | 6.057099  | 1.2546196  | 5.9398317 | 5930436O19Rik | AK020044     |
| 1440892_at   |            | 0.91878885 | 5.525634   | 1.2360147  | 5.953524  | 1.2228482  | 5.938074  | 1.1853276  | 5.893114  | Traf4         | NM_009423    |
| 1455700_at   |            | 0.98976475 | 7.997206   | 0.8162204  | 7.7190795 | 0.7399971  | 7.577664  | 0.7158297  | 7.529737  | Arhfd3        | NM_028832    |
| 1425929_a_at |            | 1.0265095  | 7.9040728  | 0.79466546 | 7.534745  | 0.68908614 | 7.3290815 | 0.7498006  | 7.4509044 | Rnf14         | NM_020012    |
| 1424457_at   |            | 1.042884   | 6.099781   | 0.8548453  | 5.8129373 | 0.89599997 | 5.8807726 | 0.792219   | 5.703173  | Apbb3         | NM_146085    |
| 1450777_at   |            | 0.98320127 | 7.0635567  | 0.7895803  | 6.7471557 | 0.83516556 | 6.828132  | 0.73426956 | 6.6423798 | Xrn2          | NM_011917    |
| 1447339_at   |            | 0.9875936  | 6.1133666  | 0.79536873 | 5.801073  | 0.7182737  | 5.6539826 | 0.7234894  | 5.664423  | ---           | CB321473     |
| 1423622_a_at |            | 0.9642524  | 7.60192    | 0.747679   | 7.2349277 | 0.71494025 | 7.1103315 | 0.72481173 | 7.190115  | Ccn1          | NM_001025442 |
| 1451101_a_at |            | 1.0099076  | 12.02348   | 1.1296968  | 12.185194 | 1.1958708  | 12.267319 | 1.1915492  | 12.262095 | Rps28         | NM_016844    |
| 1435847_at   |            | 0.9697007  | 6.826396   | 0.8841505  | 6.693149  | 0.84903264 | 6.634677  | 0.89299774 | 6.707514  | Cdc42bpa      | XM_619711    |
| 1451311_a_at |            | 1.0142981  | 9.355596   | 1.125621   | 9.505835  | 1.1841974  | 9.579023  | 1.1963481  | 9.59375   | Adipor1       | NM_028320    |
| 1442364_at   |            | 0.992925   | 7.117808   | 1.1775389  | 7.363826  | 1.2557937  | 7.4566503 | 1.2068328  | 7.3992767 | Mapk14        | NM_011951    |
| 1460278_a_at |            | 0.978309   | 6.786828   | 1.1673834  | 7.041744  | 1.1804857  | 7.0578465 | 1.168237   | 7.042799  | D15Wsu75e     | NM_134095    |
| 1439371_x_at |            | 0.9954312  | 9.411351   | 0.8573913  | 9.195983  | 0.8068455  | 9.108322  | 0.8217763  | 9.134775  | Timm44        | NM_011522    |
| 1455103_at   |            | 0.97763157 | 7.7177997  | 0.8013762  | 7.4309883 | 0.76871574 | 7.370959  | 0.7850075  | 7.4012146 | Ddx46         | XM_619101    |
| 1448154_at   |            | 0.98847674 | 11.469255  | 0.88623357 | 11.297123 | 0.8233632  | 11.191054 | 0.84086144 | 11.221394 | Ndrp2         | NM_017470    |
| 1419260_a_at |            | 1.0237186  | 9.219771   | 0.89025784 | 9.018247  | 0.887567   | 9.01388   | 0.858108   | 8.965183  | Snrpb         | NM_009225    |
| 1438181_x_at |            | 1.0185759  | 7.123183   | 1.1691517  | 7.322091  | 1.2450268  | 7.412806  | 1.160011   | 7.310768  | Tm2d2         | NM_027194    |
| 1444401_at   |            | 0.9544833  | 5.8496633  | 1.1159462  | 6.075139  | 1.0569066  | 5.9967194 | 1.0457716  | 5.981439  | C8orf13       | NM_011274    |
| 1454934_at   |            | 0.9886188  | 7.2543464  | 0.85090846 | 7.0379357 | 0.8110593  | 6.9687395 | 0.79939103 | 6.947833  | Ppm1f         | NM_176833    |
| 1440880_at   |            | 0.9848574  | 7.317927   | 0.9019412  | 7.1910453 | 0.84815127 | 7.1023335 | 0.8574496  | 7.1180634 | Mppe1         | NM_172630    |
| 1454793_x_at |            | 0.94246465 | 8.406559   | 0.7247563  | 8.0276165 | 0.6140229  | 7.7884126 | 0.6571934  | 7.8864384 | Ddx5          | NM_007840    |
| 1416870_at   |            | 1.0146102  | 7.1063457  | 0.90389305 | 6.939644  | 0.91732377 | 6.9609227 | 0.90325916 | 6.938632  | Dnal4         | NM_017470    |
| 1435757_a_at |            | 1.017762   | 12.463816  | 0.9047472  | 12.294002 | 0.9376638  | 12.345558 | 0.8761429  | 12.247654 | Uqcrc2        | NM_025899    |
| 1448908_at   |            | 0.98861176 | 9.204913   | 0.8460076  | 8.98018   | 0.8167194  | 8.92935   | 0.8059886  | 8.910268  | Ppap2b        | NM_080555    |
| 1452125_at   |            | 0.9402678  | 7.0290217  | 1.1860251  | 7.3640127 | 1.2261145  | 7.4119716 | 1.2956376  | 7.4915404 | Thrap3        | NM_146153    |
| 1443546_at   |            | 0.9743962  | 6.1308503  | 1.1567602  | 6.37836   | 1.1745381  | 6.4003634 | 1.0895002  | 6.2919364 | Hdlbp         | NM_133808    |
| 1455681_at   |            | 0.9610331  | 6.063665   | 0.8311541  | 5.8541946 | 0.80998194 | 5.8169684 | 0.7937509  | 5.787765  | Zfp369        | NM_178364    |
| 1419374_at   |            | 0.9791373  | 7.0862765  | 0.7885799  | 6.774022  | 0.78984016 | 6.776326  | 0.78051585 | 6.7591934 | Wbp4          | NM_018765    |
| 1433625_at   |            | 0.9975679  | 7.4609795  | 0.88588196 | 7.2896786 | 0.8386338  | 7.210605  | 0.8052585  | 7.152016  | 5830434P21Rik | NM_172661    |
| 1416829_at   |            | 1.0122031  | 13.1303425 | 0.929897   | 13.007987 | 0.8908842  | 12.946154 | 0.8968454  | 12.955775 | Atp5b         | NM_016774    |
| 1423132_a_at |            | 1.02185    | 9.078575   | 1.1215988  | 9.212948  | 1.1753043  | 9.280425  | 1.1290383  | 9.222486  | 5730427N09Rik | NM_021552    |
| 1460367_at   |            | 0.99472207 | 8.486897   | 0.8674095  | 8.289318  | 0.87234956 | 8.297511  | 0.80349976 | 8.178902  | Hbp1          | NM_153198    |
| 1420754_at   |            | 0.99974793 | 6.7186675  | 0.9163992  | 6.593079  | 0.8661979  | 6.5118    | 0.90947425 | 6.582136  | Ttf1          | NM_009442    |
| 1441592_at   |            | 0.9854889  | 5.470147   | 1.3836461  | 5.9597106 | 1.2738209  | 5.8403974 | 1.4488873  | 6.0261807 | ---           | AK050573     |
| 1424077_at   |            | 1.0293785  | 6.4998784  | 1.1839513  | 6.701714  | 1.246751   | 6.776278  | 1.2126764  | 6.7362995 | Gdpp1         | NM_025638    |
| 1423324_at   |            | 0.93475556 | 6.2968044  | 0.6925991  | 5.864236  | 0.57775414 | 5.602671  | 0.6860627  | 5.8505554 | Hnnp          | NM_008891    |
| 1449039_a_at |            | 1.0003895  | 7.9987547  | 0.6738618  | 7.228717  | 0.60778344 | 7.0798216 | 0.66831416 | 7.216791  | Pnrpd1        | NM_016690    |
| 1443037_at   |            | 0.9804385  | 6.244771   | 1.23006    | 6.5720005 | 1.4162751  | 6.7753735 | 1.2910213  | 6.6417847 | Sdfr1         | NM_009145    |
| 1428484_at   |            | 1.0129209  | 7.7495475  | 0.8164784  | 7.4385123 | 0.8012096  | 7.411278  | 0.84229124 | 7.4834175 | Osbp3         | NM_027881    |
| 1426236_a_at |            | 0.9937409  | 10.137436  | 1.1733559  | 10.377135 | 1.1764426  | 10.380924 | 1.173469   | 10.377273 | Glul          | NM_008131    |
| 1456808_at   |            | 0.88790715 | 6.2873635  | 1.1437491  | 6.6256537 | 1.1732742  | 6.6894226 | 1.2409961  | 6.7703815 | 4933426M11Rik | NM_178682    |
| 1442033_at   |            | 1.0063391  | 7.8640532  | 0.8507543  | 7.6217513 | 0.7875288  | 7.5103416 | 0.7662121  | 7.4707522 | 9130217G22Rik | NM_183175    |
| 1437917_at   |            | 0.9033234  | 6.701998   | 1.198928   | 7.110429  | 1.3258625  | 7.2556148 | 1.2542852  | 7.175549  | D530037H12Rik | AK052577     |
| 1458708_at   |            | 0.9642547  | 6.345509   | 1.1244705  | 6.5672684 | 1.2308441  | 6.697671  | 1.1068848  | 6.544528  | Brd4          | NM_020508    |

|              |            |           |            |            |            |            |            |           |               |              |               |
|--------------|------------|-----------|------------|------------|------------|------------|------------|-----------|---------------|--------------|---------------|
| 1436303_at   | 0.9920689  | 8.218241  | 0.84028107 | 7.9786725  | 0.759669   | 7.8331714  | 0.75424963 | 7.8228426 | Mlit4         | BC026648     | Mlit4         |
| 1432143_a_at | 1.017636   | 7.853199  | 0.8659524  | 7.6203365  | 0.8639792  | 7.617046   | 0.78923374 | 7.486502  | Hbp1          | NM_153198    | Hbp1          |
| 1436546_at   | 0.9384175  | 7.2052326 | 0.7738152  | 6.9269924  | 0.7272744  | 6.8375003  | 0.7203217  | 6.823644  | 6330549D23Rik | NM_175469    | 6330549D23Rik |
| 1418084_at   | 0.96181875 | 9.471167  | 0.7938274  | 9.194227   | 0.7431794  | 9.0991125  | 0.6868953  | 8.985491  | Nrp1          | NM_008737    | Nrp1          |
| 1417213_a_at | 0.97336346 | 6.443786  | 0.8198792  | 6.1962185  | 0.8184247  | 6.193657   | 0.8729396  | 6.286689  | Rbm6          | NM_011251    | Rbm6          |
| 1493967_x_at | 1.0316117  | 8.242296  | 1.1501197  | 8.399181   | 1.2274275  | 8.493035   | 1.2569281  | 8.527299  | Arf4          | NM_007479    | Arf4          |
| 1423533_a_at | 0.966938   | 8.6787405 | 0.7601503  | 8.331602   | 0.6614237  | 8.130892   | 0.7641504  | 8.339174  | Rhot1         | NM_021536    | Rhot1         |
| 1420493_a_at | 1.0146601  | 7.5930758 | 0.85913664 | 7.353039   | 0.84866446 | 7.3353457  | 0.78912055 | 7.230397  | Pcyl2         | NM_024229    | Pcyl2         |
| 1425516_at   | 0.9681619  | 6.770608  | 0.7610862  | 6.4234195  | 0.6501471  | 6.196126   | 0.6267044  | 6.143145  | Dgt           | NM_139144    | Dgt           |
| 1419814_s_at | 1.018057   | 11.854087 | 0.9230875  | 11.712808  | 0.93399245 | 11.729752  | 0.8703321  | 11.627907 | S100a1        | NM_011309    | S100a1        |
| 1417238_at   | 0.9844834  | 6.8627434 | 0.82932544 | 6.615315   | 0.8385779  | 6.6313214  | 0.820798   | 6.600404  | Ewsr1         | NM_007968    | Ewsr1         |
| 1451193_x_at | 1.0071384  | 6.4747524 | 0.876406   | 6.274162   | 0.844141   | 6.220046   | 0.79665697 | 6.1365213 | Ttc4          | NM_028209    | Ttc4          |
| 1423453_at   | 1.0239652  | 7.745766  | 1.164711   | 7.931571   | 1.2174642  | 7.9954786  | 1.2563382  | 8.040824  | C78541        | NM_133800    | C78541        |
| 1416813_at   | 0.97063494 | 6.142481  | 0.81049937 | 5.882363   | 0.7246663  | 5.720869   | 0.7007108  | 5.672371  | Tia1          | NM_011585    | Tia1          |
| 1436876_at   | 1.0000659  | 6.4420404 | 1.215604   | 6.7236185  | 1.1681333  | 6.66615    | 1.2052464  | 6.7112737 | D13Bwg1146e   | NM_029879    | D13Bwg1146e   |
| 1435027_at   | 0.98265225 | 6.3090973 | 0.8191009  | 6.046458   | 0.7437497  | 5.9072337  | 0.79893565 | 6.010495  | Golga1        | NM_029793    | Golga1        |
| 1451640_a_at | 0.93062747 | 6.6759562 | 0.68158144 | 6.2266383  | 0.5843912  | 6.0046873  | 0.6662001  | 6.1937084 | 1500011J06Rik | NM_001005523 | 1500011J06Rik |
| 1416690_at   | 0.9604683  | 7.875134  | 0.81710404 | 7.641916   | 0.7698284  | 7.555933   | 0.7356718  | 7.4904585 | Gtbbp2        | NM_019581    | Gtbbp2        |
| 1484837_a_at | 0.9889881  | 7.998343  | 0.8251563  | 7.7371473  | 0.80614156 | 7.703513   | 0.75391996 | 7.6068916 | Gtbbp2        | NM_019581    | Gtbbp2        |
| 1431893_a_at | 0.9811095  | 6.7915087 | 0.87390655 | 6.624574   | 0.84138745 | 6.569865   | 0.79168016 | 6.4820123 | Tprt          | NM_019581    | Tprt          |
| 1484876_at   | 1.0077652  | 9.444684  | 0.8602626  | 9.216373   | 0.7941842  | 9.10107    | 0.78352386 | 9.0815735 | Nap11a        | NM_008672    | Nap11a        |
| 1445328_at   | 0.89914143 | 6.1220994 | 0.6911689  | 5.7425895  | 0.6894056  | 5.7389045  | 0.7044061  | 5.769959  | E130010M05Rik | NM_177015    | E130010M05Rik |
| 1451104_a_at | 0.972804   | 7.1313415 | 0.8371796  | 6.9147296  | 0.83105344 | 6.9041333  | 0.79194707 | 6.834596  | Snrp70        | NM_009224    | Snrp70        |
| 1451192_a_at | 0.99486136 | 6.5918565 | 0.8575655  | 6.377608   | 0.85732394 | 6.377201   | 0.7944789  | 6.2673697 | Ttc4          | NM_028209    | Ttc4          |
| 1439531_at   | 0.92484486 | 6.1488914 | 0.75923854 | 5.864233   | 0.6361656  | 5.609082   | 0.68430454 | 5.7143188 | E130311K13    | NM_177856    | E130311K13    |
| 1418127_a_at | 0.96063936 | 9.063816  | 0.73491305 | 8.677394   | 0.5759396  | 8.325738   | 0.6659562  | 8.535248  | Pdcd8         | NM_012019    | Pdcd8         |
| 1451196_at   | 1.0082624  | 8.506094  | 0.8671259  | 8.88568544 | 0.8319088  | 8.319088   | 0.8035014  | 8.178595  | Ppel5         | NM_027166    | Ppel5         |
| 1453096_x_at | 1.0359514  | 9.962481  | 1.1748012  | 10.14394   | 1.3396232  | 10.333351  | 1.2055902  | 10.181263 | Rpl27         | NM_011289    | Rpl27         |
| 1424619_at   | 1.0051503  | 8.129031  | 1.0898546  | 8.245754   | 1.129227   | 8.296954   | 1.164011   | 8.340723  | Sf3b4         | NM_153053    | Sf3b4         |
| 1440011_at   | 0.9204733  | 5.918767  | 1.1307584  | 6.215611   | 1.262916   | 6.375078   | 1.2758092  | 6.389732  | Ext1          | NM_010162    | Ext1          |
| 1419042_at   | 0.9256369  | 7.3223443 | 0.5502932  | 6.5720987  | 0.42637154 | 6.204009   | 0.39869863 | 6.107197  | lign1         | NM_0211792   | lign1         |
| 1428810_at   | 0.98616064 | 7.349508  | 0.80322665 | 7.053492   | 0.7708277  | 6.9941773  | 0.72405094 | 6.903776  | 2700097O09Rik | NM_028314    | 2700097O09Rik |
| 1460601_at   | 1.0168607  | 5.636632  | 1.3022039  | 5.9934654  | 1.371774   | 6.0685525  | 1.2547871  | 5.9399524 | Myrip         | NM_144557    | Myrip         |
| 1454688_x_at | 1.0182633  | 7.1878324 | 1.365874   | 7.6115465  | 1.3229308  | 7.56546    | 1.317744   | 7.5597925 | Tmed10        | NM_026775    | Tmed10        |
| 1417348_at   | 1.0509719  | 8.452884  | 1.2333997  | 8.6838     | 1.4207954  | 8.887859   | 1.3736123  | 8.839134  | 2310039H08Rik | NM_025966    | 2310039H08Rik |
| 1426829_at   | 0.96602464 | 7.7131643 | 0.8377776  | 7.507672   | 0.7642929  | 7.37523    | 0.78815633 | 7.4195857 | Rxrip110      | NM_011307    | Rxrip110      |
| 1428308_at   | 1.0627196  | 9.007806  | 0.84860754 | 8.683214   | 0.78605455 | 8.576246   | 0.6730588  | 8.348849  | Pdrg1         | NM_178939    | Pdrg1         |
| 1446618_at   | 0.9259324  | 6.7219324 | 1.1523224  | 6.037134   | 1.1958288  | 7.091201   | 1.1600869  | 7.047423  | LOC432971     | AK038224     | LOC432971     |
| 1416276_a_at | 0.9951403  | 11.756214 | 1.0790117  | 11.872952  | 1.1243541  | 11.932338  | 1.1071919  | 11.910147 | Rps4x         | NM_009994    | Rps4x         |
| 1434694_at   | 0.9928952  | 7.4985538 | 1.2337586  | 7.8119006  | 1.2865148  | 7.8723083  | 1.3900523  | 7.983979  | Lrrc8         | NM_177725    | Lrrc8         |
| 1418768_at   | 0.98902345 | 7.705861  | 0.7785104  | 7.3605723  | 0.67053807 | 7.1451755  | 0.69732153 | 7.2016807 | Opa1          | NM_133752    | Opa1          |
| 1423784_at   | 0.997484   | 8.660026  | 1.4775862  | 9.226902   | 1.2799085  | 9.0197     | 1.4931519  | 9.242022  | Gars          | NM_180678    | Gars          |
| 1416791_a_at | 0.9676652  | 7.620592  | 0.8148934  | 7.372696   | 0.7551909  | 7.262926   | 0.7517599  | 7.2563562 | Nxf1          | NM_016813    | Nxf1          |
| 1423187_at   | 1.0359046  | 9.72967   | 0.9165355  | 9.553042   | 0.94280815 | 9.593815   | 0.86134356 | 9.46344   | Gabarapl2     | NM_026693    | Gabarapl2     |
| 1421922_at   | 0.9699371  | 6.035793  | 0.8017847  | 6.761117   | 0.73064804 | 6.6270785  | 0.6922059  | 6.549103  | Sh3bp5        | NM_011894    | Sh3bp5        |
| 1457161_at   | 0.95773804 | 6.9001765 | 1.2239966  | 7.2540736  | 1.2888912  | 7.3286047  | 1.2564349  | 7.29181   | 9530029O12Rik | AK035394     | 9530029O12Rik |
| 1437061_at   | 0.9675532  | 6.180074  | 0.8407826  | 5.9774656  | 0.765422   | 5.8419886  | 0.7643817  | 5.840027  | Mbd1          | NM_013594    | Mbd1          |
| 1429110_a_at | 1.024969   | 7.7723846 | 0.8694347  | 7.534954   | 0.82525474 | 7.459716   | 0.7608537  | 7.3424954 | 2810405F18Rik | NM_028142    | 2810405F18Rik |
| 1424377_at   | 0.97420925 | 7.757757  | 1.1339204  | 7.9767733  | 1.0999119  | 7.9328413  | 1.2464985  | 8.113335  | BC003885      | NM_198609    | BC003885      |
| 1454074_a_at | 0.9277454  | 7.686422  | 0.6504729  | 7.174182   | 0.51056117 | 6.8247766  | 0.56022304 | 6.958694  | 1500011J06Rik | NM_001005525 | 1500011J06Rik |
| 1438005_at   | 1.0187153  | 6.093525  | 0.8122671  | 5.7668     | 0.7077118  | 5.568008   | 0.71425676 | 5.5812883 | B230315F11Rik | NM_178766    | B230315F11Rik |
| 1424452_at   | 0.8946017  | 7.1371765 | 0.70938545 | 6.801923   | 0.60456455 | 6.5712495  | 0.67083025 | 6.721301  | 5730555F13Rik | NM_025690    | 5730555F13Rik |
| 1439283_at   | 0.86870533 | 5.402829  | 1.1771969  | 5.8412457  | 1.3274295  | 6.0145254  | 1.3496906  | 6.038519  | Osbp19        | NM_133885    | Nrd1          |
| 1433677_at   | 0.9788269  | 6.7037463 | 0.8594952  | 6.516182   | 0.7949297  | 6.40352    | 0.78779525 | 6.3905134 | Sfrs8         | NM_172276    | Sfrs8         |
| 1448157_s_at | 1.0206764  | 11.947492 | 1.1605028  | 12.132716  | 1.2011042  | 12.182327  | 1.2460858  | 12.235369 | Rpl10         | NM_052835    | Rpl10         |
| 1434461_at   | 0.9588842  | 7.4561725 | 0.7788197  | 7.1561055  | 0.6407412  | 6.8745575  | 0.6606211  | 6.918639  | 2610041B18Rik | NM_027264    | 2610041B18Rik |
| 1423217_a_at | 0.99356407 | 7.441128  | 0.87885076 | 7.264133   | 0.80942667 | 7.1454153  | 0.7955722  | 7.1205072 | 2510049I19Rik | NM_026455    | 2510049I19Rik |
| 1444246_at   | 0.9842836  | 5.8566313 | 1.2303066  | 6.1785035  | 1.2145588  | 6.159918   | 1.1241101  | 6.0482693 | Chd2          | XM_145698    | Chd2          |
| 1438291_x_at | 1.0204717  | 8.186666  | 1.2022724  | 8.423193   | 1.2826948  | 8.516607   | 1.1729633  | 8.387587  | Rpl37         | NM_026069    | ---           |
| 1433669_at   | 0.9661655  | 7.5540705 | 0.7720932  | 7.2305756  | 0.71997726 | 7.129752   | 0.6543259  | 6.99181   | Akap8         | NM_019774    | Akap8         |
| 1423130_a_at | 0.8628391  | 9.526083  | 0.5879963  | 8.972799   | 0.68924415 | 9.202007   | 0.5578414  | 8.896847  | Sfrs5         | NM_009159    | Sfrs5         |
| 1417151_a_at | 1.0389876  | 6.6585875 | 0.8763611  | 6.4130063  | 0.80590326 | 6.292088   | 0.74957395 | 6.187552  | Ntstr2        | NM_008747    | Ntstr2        |
| 1431143_x_at | 1.00186    | 6.653785  | 0.8315345  | 6.3849516  | 0.8401813  | 6.3998766  | 0.7540035  | 6.2437468 | Amid          | NM_153779    | Amid          |
| 1436925_at   | 0.98521227 | 8.071836  | 1.1674405  | 8.316681   | 1.2259336  | 8.387212   | 1.3667798  | 8.544112  | Ches1         | NM_183186    | Ches1         |
| 1422429_at   | 1.0246145  | 8.591449  | 0.870813   | 8.356802   | 0.85974133 | 8.338343   | 0.8014062  | 8.236973  | Rnf14         | NM_020012    | Rnf14         |
| 1453289_at   | 0.92699754 | 6.169534  | 0.78359234 | 5.9270716  | 0.6612956  | 5.682264   | 0.71977985 | 5.8045244 | Eif2c4        | NM_153177    | Eif2c4        |
| 1433503_at   | 1.0050402  | 9.839603  | 0.80729425 | 9.523517   | 0.6530847  | 9.217692   | 0.7003021  | 9.318399  | Zadh1         | NM_029880    | Zadh1         |
| 1415775_at   | 1.0040536  | 10.670573 | 0.8820045  | 10.483594  | 0.8686386  | 10.461564  | 0.81792593 | 10.374779 | Rbbp7         | NM_009031    | Rbbp7         |
| 1428090_at   | 1.0046022  | 9.674026  | 0.79090756 | 9.328981   | 0.6541924  | 9.055188   | 0.6375495  | 9.01801   | 2810422B04Rik | NM_027275    | 2810422B04Rik |
| 1455634_at   | 0.98161954 | 6.5745587 | 1.1763154  | 6.835598   | 1.2329494  | 6.903436   | 1.2511389  | 6.924565  | Son           | NM_019973    | Son           |
| 1428442_at   | 1.0071958  | 8.385795  | 0.8629877  | 8.162862   | 0.90908253 | 8.237933   | 0.8191947  | 8.0877285 | Mmp24         | NM_010808    | BC029722      |
| 1415687_a_at | 1.0190291  | 11.554591 | 0.81213146 | 11.2271805 | 0.7725015  | 11.1550045 | 0.70362705 | 11.020278 | Psap          | NM_011179    | Psap          |
| 1426324_at   | 0.9695596  | 7.520362  | 0.7800965  | 7.206685   | 0.65014195 | 6.943787   | 0.715597   | 7.08218   | H2-D1         | NM_010380    | H2-D1         |
| 1421441_at   | 1.0068262  | 6.674257  | 0.6786487  | 6.105179   | 0.56438893 | 5.839204   | 0.5060823  | 5.681886  | Angpt1        | NM_009640    | Angpt1        |
| 1416402_at   | 1.010719   | 7.810816  | 0.86060053 | 7.5788493  | 0.893375   | 7.6327715  | 0.79958296 | 7.472753  | Abcb10        | NM_019552    | Abcb10        |
| 1431176_at   | 0.9339476  | 5.970534  | 0.7315585  | 6.518166   | 0.62350696 | 5.3875985  | 0.64439917 | 5.4351473 | 2310010I16Rik | NM_025519    | 2310010I16Rik |
| 1457727_at   | 0.9754164  | 5.9985723 | 1.1857275  | 6.280255   | 1.2326468  | 6.3362417  |            |           |               |              |               |

|              |            |           |            |            |            |           |            |           |               |              |               |
|--------------|------------|-----------|------------|------------|------------|-----------|------------|-----------|---------------|--------------|---------------|
| 1451277_at   | 1.0105351  | 9.228143  | 0.8496121  | 8.9779     | 0.746311   | 8.790873  | 0.7761065  | 8.84735   | Zadh2         | NM_146090    | Zadh2         |
| 1457315_at   | 1.0275724  | 6.069911  | 0.8944437  | 5.8697333  | 0.8697637  | 5.8293724 | 0.8066371  | 5.720662  | A230051G13    | AI464795     | A230051G13Rik |
| 1418988_at   | 1.0301774  | 8.702935  | 0.8260186  | 8.38429    | 0.6990501  | 8.14351   | 0.6776151  | 8.09858   | Pex7          | NM_008822    | Pex7          |
| 1451728_at   | 0.9575873  | 7.408844  | 0.75330377 | 7.0626717  | 0.5971844  | 6.7276173 | 0.65080756 | 6.851671  | Wdr13         | NM_026137    | Wdr13         |
| 1426810_at   | 0.996982   | 7.690482  | 0.7937736  | 7.3616424  | 0.7402671  | 7.26096   | 0.8270396  | 7.4208713 | Jmjd1a        | XM_194279    | Jmjd1a        |
| 1448771_a_at | 1.0139418  | 12.685191 | 1.0747507  | 12.769218  | 1.1155819  | 12.823013 | 1.1187965  | 12.827164 | Fth1          | NM_010239    | Fth1          |
| 1430019_a_at | 0.9551915  | 7.8678684 | 0.8016707  | 7.615088   | 0.6782595  | 7.3739157 | 0.7487107  | 7.5164866 | Hnrp1a        | NM_010447    | Hnrp1a        |
| 1419461_at   | 1.0070363  | 7.574899  | 0.8886594  | 7.3944855  | 0.8571034  | 7.3423247 | 0.80201495 | 7.246484  | Rpp14         | NM_025938    | Rpp14         |
| 1430020_x_at | 0.9488354  | 7.7619944 | 0.772229   | 7.4648657  | 0.68734735 | 7.296876  | 0.7149138  | 7.353606  | Hnrp1a        | NM_010447    | Hnrp1a        |
| 1417255_at   | 0.97859174 | 6.3025594 | 0.77901465 | 5.973502   | 0.8015322  | 6.014612  | 0.8273208  | 6.060299  | Wdtdc2        | XM_359298    | Wdtdc2        |
| 1429581_at   | 1.0286288  | 6.378358  | 0.65635246 | 5.7301784  | 0.5200928  | 5.3944764 | 0.52330667 | 5.4033637 | Acad9         | NM_172678    | Acad9         |
| 1455305_x_at | 0.9639593  | 8.098958  | 0.7902375  | 7.803172   | 0.7464219  | 7.720877  | 0.75912094 | 7.7452154 | Hnrp1a        | NM_010447    | Hnrp1a        |
| 1452000_s_at | 1.0068947  | 7.972128  | 1.4954253  | 8.54277    | 1.2992085  | 8.339848  | 1.5441585  | 8.589035  | Sars1         | NM_011319    | Sars1         |
| 1448963_at   | 1.0135928  | 8.148431  | 0.88434535 | 7.9516344  | 0.9084882  | 7.9904923 | 0.82961917 | 7.8594737 | Nfyc          | NM_008692    | Nfyc          |
| 1426375_s_at | 1.0123972  | 8.466801  | 0.86211246 | 8.234974   | 0.855636   | 8.224094  | 0.80553293 | 8.137041  | BC019806      | NM_145640    | BC019806      |
| 1433752_s_at | 0.9763921  | 6.971775  | 0.84270644 | 6.7593466  | 0.8253669  | 6.72935   | 0.80339694 | 6.690427  | D030016E14Rik | NM_177240    | D030016E14Rik |
| 1420157_s_at | 1.0079529  | 8.012384  | 0.90329224 | 7.8542123  | 0.8420371  | 7.7529125 | 0.8715811  | 7.802664  | Abcf1         | NM_013854    | Abcf1         |
| 1436559_a_at | 0.9786873  | 6.330245  | 0.8205545  | 6.0759964  | 0.6942237  | 5.8347974 | 0.7990319  | 6.03765   | Psmid10       | NM_016883    | Psmid10       |
| 1448787_at   | 1.0297635  | 7.43317   | 0.9105526  | 7.2566715  | 0.85370624 | 7.162668  | 0.839861   | 7.139079  | Moap1         | NM_022323    | Moap1         |
| 1441200_at   | 0.9509691  | 7.3273287 | 1.2214046  | 7.6884003  | 1.0997696  | 7.5370603 | 1.0826573  | 7.5144353 | KIF3          | NM_010447    | KIF3          |
| 1456012_x_at | 1.000362   | 10.530449 | 1.1299152  | 10.7061405 | 1.1977651  | 10.790272 | 1.1657286  | 10.751159 | Rnaset2       | NM_026611    | Rnaset2       |
| 1460028_at   | 0.9439533  | 6.268726  | 0.81218064 | 6.051811   | 0.75188625 | 5.940525  | 0.7038769  | 5.8453336 | Grip2         | AW122244     | Grip2         |
| 1418395_at   | 1.0030425  | 8.939419  | 0.872246   | 8.737842   | 0.8659514  | 8.727393  | 0.75959533 | 8.538339  | 1300013J15Rik | NM_026183    | 1300013J15Rik |
| 1456436_x_at | 1.0182767  | 11.617349 | 1.1454847  | 11.787178  | 1.16229    | 11.808189 | 1.207508   | 11.863252 | Rps20         | NM_026147    | Rps20         |
| 1428907_at   | 0.92374647 | 7.369003  | 0.66651785 | 6.8981495  | 0.44030297 | 6.300022  | 0.583563   | 6.7063947 | 2600011C06Rik | XM_619008    | 2600011C06Rik |
| 1447312_at   | 0.990047   | 5.903585  | 1.1662388  | 6.139889   | 1.2545015  | 6.2451396 | 1.1894351  | 6.168302  | Ankib1        | NM_001003909 | Ankib1        |
| 1455316_x_at | 0.9738684  | 11.272085 | 0.81886184 | 11.029781  | 0.8193427  | 11.022825 | 10.987894  | 10.987894 | Ccrn4f        | NM_009834    | Ccrn4f        |
| 1416059_at   | 0.99405813 | 6.824508  | 1.1771823  | 7.0684443  | 1.133241   | 7.0135612 | 1.2882748  | 7.198547  | Sec23b        | NM_019787    | Sec23b        |
| 1435800_a_at | 1.0272825  | 10.959773 | 1.1997885  | 11.183721  | 1.1924992  | 11.174929 | 11.2132514 | 11.19982  | Csda          | NM_011733    | Csda          |
| 1423987_at   | 1.0205288  | 7.9567766 | 1.1270745  | 8.100042   | 1.1875288  | 8.1754222 | 1.2202     | 8.214577  | Cdc26         | NM_139291    | Cdc26         |
| 1454980_at   | 0.9842156  | 8.681879  | 0.830624   | 8.437099   | 0.6767891  | 8.141611  | 0.74017406 | 8.270768  | 4930402E16Rik | NM_198308    | 4930402E16Rik |
| 1435743_at   | 0.9745249  | 6.402579  | 0.79686886 | 6.112222   | 0.6707297  | 5.863611  | 0.64779085 | 5.813408  | Klh23         | NM_177784    | Klh23         |
| 1427192_a_at | 0.9756176  | 7.037681  | 0.8817818  | 6.8917866  | 0.80918205 | 6.7678294 | 0.8006633  | 6.7525606 | Brd8          | NM_030147    | Brd8          |
| 1424018_at   | 1.0251352  | 11.419418 | 1.127684   | 11.556967  | 1.2326783  | 11.685401 | 1.1861011  | 11.629831 | Hint1         | NM_008248    | Hint1         |
| 1417670_at   | 0.9852092  | 8.051672  | 0.7916522  | 7.7361093  | 0.70912045 | 7.5727234 | 0.72258425 | 7.6044083 | Timm44        | NM_011592    | Timm44        |
| 1425673_at   | 0.9015555  | 6.0937424 | 1.1271077  | 6.2849009  | 1.2849009  | 6.604912  | 1.3291903  | 6.653802  | Lpp           | NM_178665    | Lpp           |
| 1416632_at   | 1.0104109  | 8.793134  | 0.8248861  | 8.500459   | 0.8189541  | 8.490044  | 0.7141397  | 8.292469  | Mod1          | NM_008615    | Mod1          |
| 1422704_at   | 0.9857831  | 8.15385   | 0.78294396 | 7.821488   | 0.61352766 | 7.4697075 | 0.69204354 | 7.643442  | Gyk           | NM_008194    | Gyk           |
| 1425764_a_at | 0.96814245 | 8.03207   | 0.7550551  | 7.673433   | 0.6569481  | 7.4726305 | 0.58763397 | 7.3117685 | Bcat2         | NM_009737    | Bcat2         |
| 1450561_a_at | 1.0225722  | 8.252803  | 0.91008335 | 8.08467    | 0.9211485  | 8.102106  | 0.8394933  | 7.9681907 | Surf1         | NM_013677    | Surf1         |
| 1439926_at   | 0.85835135 | 6.3426437 | 1.2028445  | 6.829454   | 1.3751991  | 7.022644  | 1.2530398  | 6.8884354 | 4632417D23    | NM_172934    | 4632417D23    |
| 1453127_at   | 1.0114579  | 6.630791  | 0.7705537  | 6.2383227  | 0.3960316  | 6.179178  | 0.6633995  | 6.0223045 | Ppmj1         | NM_027982    | Ppmj1         |
| 1417683_at   | 1.0398972  | 9.07456   | 0.93323654 | 8.918434   | 0.8708787  | 8.818663  | 0.81688684 | 8.726327  | Diablo        | NM_023232    | Diablo        |
| 1452439_s_at | 0.9914175  | 7.6557937 | 0.7523841  | 7.25777    | 0.60024315 | 6.9318476 | 0.6800689  | 7.111982  | Sfrs2         | NM_011358    | Sfrs2         |
| 1451100_a_at | 1.0233551  | 6.022408  | 1.2927327  | 6.3595257  | 1.5462756  | 6.617899  | 1.6397489  | 6.7025766 | Cdv3          | NM_175565    | Cdv3          |
| 1429538_a_at | 0.90534824 | 6.14504   | 0.6361247  | 5.6358767  | 0.45910195 | 5.165382  | 0.45883462 | 5.1645412 | 5730406M06Rik | NM_283936    | 5730406M06Rik |
| 1440225_at   | 0.9555817  | 7.194889  | 0.82179195 | 6.9772825  | 6.710139   | 6.8664327 | 6.68324625 | 6.710915  | Gpr116        | XM_283436    | Gpr116        |
| 1438255_at   | 0.9970976  | 8.096032  | 1.1744713  | 8.332236   | 1.3040947  | 8.4832735 | 1.375213   | 8.55988   | Ches1         | NM_183186    | Ches1         |
| 1434997_at   | 1.0203568  | 6.281127  | 0.8989058  | 6.098295   | 0.8534257  | 6.023391  | 0.86915946 | 6.0497465 | Cdc216        | NM_198164    | Cdc216        |
| 1447447_s_at | 0.9990499  | 7.6469593 | 0.84875315 | 7.4117475  | 0.8252363  | 7.3712096 | 0.73070544 | 7.1956925 | Srrm1         | NM_016799    | Srrm1         |
| 1433430_s_at | 0.9881269  | 6.79404   | 0.8385641  | 6.5572643  | 0.8128634  | 6.5123568 | 0.7276405  | 6.3525696 | Cdc23         | NM_178347    | Cdc23         |
| 1429533_at   | 1.084465   | 9.694954  | 0.8128887  | 9.27886    | 0.787278   | 9.232676  | 0.7738956  | 9.207941  | Immt          | NM_029673    | Immt          |
| 1419027_s_at | 1.0026319  | 7.3431277 | 1.1359589  | 7.5232463  | 1.2134752  | 7.61848   | 1.3255603  | 7.7459383 | Gltp          | NM_019821    | MGI:1929253   |
| 1415872_at   | 0.8891801  | 8.94113   | 0.58759063 | 8.343466   | 0.38169998 | 7.721093  | 0.49390638 | 8.092892  | Hnrp1h        | NM_021510    | Hnrp1h        |
| 1426698_a_at | 0.919758   | 6.8531003 | 0.7106742  | 6.481034   | 0.55020666 | 6.1118193 | 0.6756227  | 6.4080634 | Hnrpm         | NM_029804    | Hnrpm         |
| 1439125_at   | 0.9158444  | 5.4084663 | 1.1799673  | 5.774039   | 1.2062869  | 5.8058653 | 1.3768502  | 5.9966636 | Add1          | NM_001024458 | Add1          |
| 1427371_at   | 0.98950416 | 9.845343  | 0.816433   | 9.567971   | 0.7469444  | 9.439637  | 0.69196653 | 9.329338  | Abca8a        | NM_153145    | Abca8a        |
| 1454044_a_at | 1.0245309  | 7.3635755 | 0.89516854 | 7.1688437  | 0.9306031  | 7.22485   | 0.8574192  | 7.106685  | Pex3          | NM_019961    | Pex3          |
| 1421923_at   | 0.95614153 | 7.11436   | 0.7294847  | 6.7240133  | 0.73837644 | 6.7414923 | 0.69198495 | 6.6478763 | Sh3bp5        | NM_011894    | Sh3bp5        |
| 1430075_at   | 0.9616768  | 5.9298124 | 1.2232819  | 6.2769456  | 1.4630574  | 6.535175  | 1.3384181  | 6.4067173 | Sf3b3         | NM_133953    | Sf3b3         |
| 1456886_at   | 0.96568364 | 6.2472696 | 0.83375776 | 6.0353475  | 0.7434141  | 5.8698854 | 0.7587377  | 5.8993206 | ---           | BE47333      | ---           |
| 1426688_at   | 0.98639804 | 11.768968 | 0.8098295  | 11.484416  | 0.6818704  | 11.236296 | 0.713725   | 11.302166 | Sdha          | NM_023281    | Sdha          |
| 1415807_s_at | 0.9900659  | 7.4964514 | 0.774987   | 7.143099   | 0.69051796 | 6.9766054 | 0.8088823  | 7.204857  | Sfrs2         | NM_011358    | Sfrs2         |
| 1418627_at   | 1.0418508  | 7.5073376 | 1.3940814  | 7.9275036  | 1.4128989  | 7.9468465 | 1.4955798  | 8.028893  | Gclm          | NM_008129    | Gclm          |
| 1435349_at   | 0.9366367  | 7.22246   | 0.7962529  | 6.9881964  | 0.6734054  | 6.746445  | 0.6706118  | 6.7404475 | Nrp2          | NM_010939    | Nrp2          |
| 1436073_at   | 0.9669987  | 7.0661716 | 0.8484996  | 6.877572   | 0.7516756  | 6.7027683 | 0.79709226 | 6.7874045 | A630007B06Rik | NM_170757    | A630007B06Rik |
| 1416268_at   | 0.98896486 | 9.582816  | 0.8126913  | 9.299604   | 0.8485215  | 9.361848  | 0.72255147 | 9.129996  | Ets2          | NM_011809    | Ets2          |
| 1448221_at   | 1.0168887  | 9.362722  | 0.7929108  | 9.003791   | 0.8123658  | 9.038761  | 0.72590774 | 8.876419  | Bat1a         | NM_019693    | Bat1a         |
| 1434443_at   | 0.9787038  | 6.418902  | 0.8331597  | 6.186622   | 0.6945558  | 5.924212  | 0.767413   | 6.0680327 | Anapc1        | NM_008569    | ---           |
| 1418473_at   | 0.98306113 | 6.4628906 | 0.8351823  | 6.227701   | 0.7820283  | 6.1328306 | 0.732375   | 6.0381923 | Cutc          | NM_025530    | Cutc          |
| 1433463_at   | 0.9861634  | 8.6027229 | 0.8081575  | 8.015539   | 0.6867036  | 7.78059   | 0.7454347  | 7.8989844 | 0610010K06Rik | NM_027861    | 0610010K06Rik |
| 1416327_at   | 1.0170518  | 8.972632  | 1.1617508  | 9.164539   | 1.2026563  | 9.214462  | 1.2279092  | 9.244442  | Ufc1          | NM_025388    | Ufc1          |
| 1451070_at   | 0.97416013 | 8.039395  | 0.8468185  | 7.8372893  | 0.7901232  | 7.737314  | 0.7481473  | 7.658559  | Gdi1          | NM_010273    | Gdi1          |
| 1452206_at   | 0.9446018  | 11.056891 | 0.6558608  | 10.530575  | 0.49569872 | 10.126648 | 0.52562654 | 10.211223 | Sucl2a        | NM_011506    | Sucl2a        |
| 1442732_at   | 0.9079523  | 6.224619  | 1.4392031  | 6.8892     | 1.3307966  | 6.7762203 | 1.5765041  | 7.020659  | Hadhb         | NM_145558    | Hadhb         |
| 1428534_at   | 1.0386986  | 6.061185  | 0.8353589  | 5.7468762  | 0.91618276 | 5.8801157 | 0.7835054  | 5.654423  | 2310073E15Rik | NM_001025586 | 2310073E15Rik |
| 1435923_at   | 1.0206561  | 7.4330935 | 1.1610072  | 7.6189733  | 1.2370894  | 7.7105465 | 1.3383907  | 7.8240957 | Gm237         | NM_001005419 | Gm237         |
| 1430896_s_at | 1.0434133  | 9.087825  | 0.8748675  | 8.83       |            |           |            |           |               |              |               |

|              |            |            |            |            |            |            |            |           |               |              |                  |
|--------------|------------|------------|------------|------------|------------|------------|------------|-----------|---------------|--------------|------------------|
| 1455286_at   | 1.0001736  | 10.666034  | 0.8177743  | 10.375559  | 0.7037217  | 10.158861  | 0.7813228  | 10.309774 | Btdb1         | NM_146193    | Btdb1            |
| 1429001_at   | 1.0245904  | 5.4573636  | 1.2033298  | 5.6893487  | 1.4635271  | 5.9717665  | 1.3595166  | 5.8654103 | Pir           | NM_027153    | Pir              |
| 1451286_s_at | 0.99633956 | 7.620435   | 0.69246376 | 7.095536   | 0.6061237  | 6.90341    | 0.599624   | 6.8878555 | Fus           | NM_139149    | Fus              |
| 1426387_x_at | 0.99270236 | 6.1015434  | 0.8779253  | 5.92428    | 0.75790554 | 5.7122     | 0.8073982  | 5.8034625 | 4933439C20Rik | NM_001004146 | 4933439C20Rik    |
| 1449137_at   | 0.99953026 | 11.403963  | 0.7184902  | 10.927682  | 0.5280716  | 10.483446  | 0.5944472  | 10.654261 | Pdha1         | NM_008810    | Pdha1            |
| 1455493_at   | 0.9622413  | 8.240717   | 0.7865064  | 7.9497766  | 0.6979884  | 7.775216   | 0.69280434 | 7.7667665 | Syne1         | NM_022027    | Syne1            |
| 1426554_a_at | 1.019004   | 8.542304   | 1.2862202  | 8.578282   | 1.3723205  | 8.971261   | 0.6951389  | 9.288413  | Pgam1         | NM_023417    | Pgam1            |
| 1425113_x_at | 0.96704996 | 7.257002   | 0.84216785 | 7.057519   | 0.7781512  | 6.943462   | 0.76174426 | 6.912718  | ---           | BC020068     | ---              |
| 1433525_at   | 1.0051724  | 7.2221994  | 1.2153231  | 7.4960966  | 1.2936118  | 7.5861607  | 1.4595487  | 7.760279  | Ednra         | NM_010332    | Ednra            |
| 1416634_at   | 1.0118785  | 8.862162   | 1.1461513  | 9.0419235  | 1.2286232  | 9.142168   | 1.2499331  | 9.166977  | 5730536A07Rik | NM_026635    | 5730536A07Rik    |
| 1415942_at   | 1.018596   | 12.084264  | 1.1752062  | 12.290596  | 1.1901453  | 12.30882   | 1.2443393  | 12.373062 | Rpl10         | NM_052835    | Rpl10 /// LOC23- |
| 1421872_at   | 1.0213759  | 7.189817   | 0.8040826  | 6.844719   | 0.70658803 | 6.658245   | 0.688723   | 6.6212993 | Rab24         | NM_009000    | Rab24            |
| 1417265_s_at | 1.0038351  | 9.109839   | 0.8342881  | 8.842936   | 0.78507745 | 8.755224   | 0.7444567  | 8.678577  | D5ErtD33e     | NM_026504    | D5ErtD33e        |
| 1421827_at   | 1.0284035  | 6.4303813  | 0.87125576 | 6.1911435  | 0.85793996 | 6.1689234  | 0.795243   | 6.0594425 | Dil4          | NM_019454    | Dil4             |
| 1417008_at   | 1.0209521  | 9.921371   | 0.8742392  | 9.697556   | 0.80358076 | 9.575972   | 0.7018592  | 9.38071   | Crat          | NM_007760    | Crat             |
| 1426586_at   | 1.0144701  | 11.371461  | 0.87766707 | 11.16248   | 0.8179906  | 11.060891  | 0.80157524 | 11.031645 | Sbc25a11      | NM_024211    | Sbc25a11         |
| 1438922_x_at | 1.0174373  | 8.3683195  | 1.1848966  | 8.588142   | 1.3017102  | 8.723789   | 1.3912138  | 8.819724  | Sbc25a5       | NM_007451    | Sbc25a5 /// LOC4 |
| 1451747_a_at | 1.0013857  | 6.8355274  | 0.8165987  | 6.5411229  | 0.7183522  | 6.3562927  | 0.6695334  | 6.2547574 | Atg12         | NM_026217    | Atg12            |
| 1438175_x_at | 1.0278318  | 11.029454  | 0.700313   | 10.475923  | 0.6545221  | 10.378364  | 0.57718074 | 10.196945 | Myom2         | NM_008664    | Myom2            |
| 1431745_a_at | 0.9982681  | 8.993515   | 1.1077845  | 9.143693   | 1.1756361  | 9.229489   | 1.2226651  | 9.286044  | 2700069A02Rik | NM_001008506 | 2700069A02Rik    |
| 1429145_at   | 0.9916393  | 7.2072635  | 1.2215995  | 7.5081477  | 1.1790174  | 7.4569616  | 1.3296621  | 7.630436  | Nhrac2        | NM_025811    | Nhrac2           |
| 1417690_at   | 1.0242918  | 9.23304    | 0.88417375 | 9.020813   | 0.906785   | 9.057387   | 0.80686575 | 8.888813  | Prkg1         | NM_016781    | Prkg1            |
| 1428503_a_at | 0.9576043  | 7.9021926  | 0.8195982  | 7.67768    | 0.71816695 | 7.487082   | 0.8072058  | 7.6556993 | Nkiras1       | NM_023526    | Nkiras1          |
| 1438400_at   | 0.9971707  | 7.0939913  | 0.8347906  | 6.8375654  | 0.8171103  | 6.806682   | 0.6930233  | 6.569055  | 4632411B12Rik | NM_172652    | 4632411B12Rik    |
| 1422747_at   | 1.0294267  | 6.529236   | 0.8694118  | 6.285507   | 0.86262834 | 6.274206   | 0.74070996 | 6.0543756 | Chek2         | NM_016681    | Chek2            |
| 1455762_at   | 0.9229025  | 7.3616023  | 0.71500456 | 6.9933767  | 0.6772573  | 6.9151278  | 0.66812867 | 6.89555   | C330002119Rik | NM_126866    | C330002119Rik    |
| 1448715_x_at | 0.9837755  | 10.328211  | 0.8226119  | 10.070093  | 0.8062966  | 10.04119   | 0.79341024 | 10.017948 | Ccrn4l        | NM_009834    | Ccrn4l /// LOC28 |
| 1437834_s_at | 1.021312   | 8.901526   | 0.88643754 | 8.697195   | 0.79575914 | 8.541507   | 0.7563386  | 8.468207  | Pascin3       | NM_028733    | Pascin3          |
| 1423711_at   | 1.0048815  | 8.21945    | 0.8352057  | 7.952628   | 0.90371424 | 8.066363   | 0.7774531  | 7.8492527 | Ndufaf1       | NM_027175    | Ndufaf1          |
| 1417573_at   | 0.9944355  | 9.788071   | 0.9097597  | 9.6596775  | 0.8689987  | 9.593547   | 0.83549726 | 9.536828  | 2010311D03Rik | NM_133839    | 2010311D03Rik    |
| 1454236_a_at | 1.0510346  | 6.4160566  | 0.8961799  | 6.1861067  | 0.82129896 | 6.0602264  | 0.71880937 | 5.8679276 | C030004A17Rik | NM_175411    | C030004A17Rik    |
| 1454790_at   | 1.0070726  | 6.011939   | 0.84426504 | 5.7575393  | 0.8359486  | 5.7432575  | 0.6891853  | 5.464736  | Wdr35         | NM_172470    | Wdr35            |
| 1448921_a_at | 1.0080857  | 8.331007   | 0.8814458  | 8.137333   | 0.84936005 | 8.083837   | 0.75254756 | 7.9092436 | Mrps9         | NM_023514    | Mrps9            |
| 1422624_at   | 1.010184   | 6.211581   | 0.81224024 | 5.896941   | 0.7024119  | 5.687352   | 0.6285507  | 5.527064  | Rev11         | NM_019570    | Rev11            |
| 1430288_x_at | 1.026391   | 11.645942  | 1.1148432  | 11.7652025 | 1.1681894  | 11.832636  | 1.1067774  | 11.754726 | Rps21         | NM_025587    | Rps21            |
| 1434131_at   | 1.0052711  | 7.278772   | 0.90072185 | 7.120341   | 0.8813692  | 7.089006   | 0.8151502  | 6.9763255 | Rufy1         | NM_172557    | Rufy1            |
| 1456373_x_at | 1.0201191  | 11.774504  | 1.1234581  | 11.9137125 | 1.1499002  | 11.947275  | 1.1934658  | 12.000923 | Rps20         | NM_026147    | Rps20            |
| 1448109_a_at | 1.0045855  | 12.401047  | 1.0789576  | 12.504823  | 1.0794823  | 12.504786  | 1.1211914  | 12.559479 | Rpl26         | NM_009080    | Rpl26            |
| 1451988_s_at | 1.0271003  | 10.144192  | 0.8940725  | 9.944078   | 0.85753256 | 9.883878   | 0.8470565  | 9.866144  | Chmp4b        | NM_029362    | Chmp4b           |
| 1429071_at   | 1.0390147  | 8.758723   | 0.88081026 | 8.520411   | 0.9153453  | 8.575895   | 0.75370574 | 8.295581  | Me3           | NM_181407    | Me3              |
| 1448365_at   | 0.9747512  | 7.936576   | 0.8600954  | 7.7560387  | 0.76497257 | 7.58695    | 0.7887391  | 7.63109   | Exosc7        | NM_284543    | Exosc7           |
| 1437783_x_at | 0.99060357 | 8.042667   | 1.2164788  | 8.339      | 1.2689919  | 8.399949   | 1.3327132  | 8.4706545 | Temn4         | NM_019593    | Temn4            |
| 1450932_s_at | 0.99050933 | 7.213636   | 0.8004031  | 6.906192   | 0.7815826  | 6.871864   | 0.66393477 | 6.636507  | Dock9         | NM_358315    | Dock9            |
| 1433912_at   | 0.99049175 | 8.013316   | 0.78442776 | 7.676812   | 0.71695995 | 7.5470643  | 0.69574875 | 7.503738  | Tipr1         | NM_145513    | Tipr1            |
| 1448517_at   | 1.0311913  | 7.9876776  | 0.8796066  | 7.758296   | 0.83574575 | 7.684501   | 0.754948   | 7.537814  | Timm22        | NM_019818    | Timm22           |
| 1415984_at   | 0.99431187 | 12.447335  | 0.8043759  | 12.141107  | 0.62824255 | 11.784996  | 0.6345454  | 11.79936  | Acadm         | NM_007382    | Acadm            |
| 1454474_at   | 0.89911157 | 7.8946457  | 0.579561   | 7.261506   | 0.32278135 | 6.4167023  | 0.41772977 | 6.7887154 | Zfp445        | NM_027364    | Zfp445           |
| 1453199_at   | 1.0010675  | 6.05506    | 1.22635    | 6.3478913  | 1.4673486  | 6.6067324  | 1.2991073  | 6.4310412 | Acdb6         | NM_028250    | Acdb6            |
| 1454928_at   | 0.9638949  | 6.995996   | 0.8844636  | 6.8719225  | 0.80021036 | 6.727499   | 0.794142   | 6.716517  | Safb          | NM_128715    | Safb             |
| 1426987_at   | 0.99791497 | 7.075465   | 1.1809261  | 7.318395   | 1.29891    | 7.455778   | 1.345625   | 7.506753  | 5430417L22Rik | NM_077391    | 5430417L22Rik    |
| 1442169_at   | 1.0140185  | 7.965871   | 0.8735278  | 7.7507124  | 0.79865223 | 7.6214266  | 0.7302972  | 7.492343  | Vldlr         | NM_013703    | Vldlr            |
| 1419927_s_at | 0.94121    | 6.676959   | 0.6668241  | 6.1797485  | 0.7322007  | 6.314681   | 0.61431676 | 6.0614247 | Rabif         | NM_145510    | Rabif            |
| 1416478_a_at | 1.0176646  | 12.658983  | 0.91761816 | 12.509686  | 0.90282464 | 12.4862385 | 0.86467284 | 12.423947 | Mdh2          | NM_008617    | Mdh2             |
| 1460204_at   | 1.0140556  | 7.5862885  | 0.79503417 | 7.325241   | 0.73714    | 7.1261625  | 0.792573   | 7.2307677 | Tec           | NM_013689    | Tec              |
| 1428662_a_at | 1.0261817  | 12.410751  | 0.8643863  | 12.163214  | 0.8506397  | 12.140086  | 0.72563976 | 11.91079  | Hod           | NM_175606    | Hod              |
| 1418007_at   | 0.9148253  | 5.9602427  | 0.68253314 | 5.5376453  | 0.4665089  | 4.9886513  | 0.48957318 | 5.058271  | 1810007M14Rik | NM_358888    | 1810007M14Rik    |
| 1416838_at   | 0.969112   | 9.351799   | 0.75316906 | 8.988109   | 0.61284    | 8.690645   | 0.5919887  | 8.640705  | Mut           | NM_008650    | Mut              |
| 1417600_at   | 0.8132931  | 5.811937   | 0.5360884  | 5.2106323  | 0.40184665 | 4.794807   | 0.36409    | 4.6524563 | Slc15a2       | NM_021301    | Slc15a2          |
| 1417204_at   | 1.0516719  | 8.846874   | 1.2307832  | 9.073767   | 1.2841488  | 9.135003   | 1.5482886  | 9.404864  | Kdelr2        | NM_025841    | Kdelr2           |
| 1451102_at   | 1.0023487  | 7.817032   | 0.8545221  | 7.586837   | 0.7726326  | 7.4415016  | 0.7385635  | 7.376441  | Cnot8         | NM_026949    | Cnot8            |
| 1449355_a_at | 1.0024557  | 6.4939423  | 0.8445514  | 6.24666    | 0.86842155 | 6.286871   | 0.7405222  | 6.0570183 | Eps15l1       | NM_007944    | Eps15l1          |
| 1423710_at   | 0.9958501  | 10.68235   | 0.8651651  | 10.479397  | 0.7946489  | 10.356739  | 0.7099596  | 10.194159 | Dist          | NM_030225    | Dist             |
| 1416570_s_at | 0.9817757  | 9.60055    | 0.8316633  | 9.361157   | 0.72550565 | 9.1641445  | 0.66392416 | 9.036176  | Gfm1          | NM_138591    | Gfm1             |
| 1447679_s_at | 0.97101384 | 8.776955   | 0.8553089  | 8.593907   | 0.7001381  | 8.305102   | 0.79925823 | 8.496124  | Bms1l         | NM_194339    | Bms1l            |
| 1424610_at   | 1.0528125  | 6.5656557  | 0.8734206  | 6.296156   | 0.8530524  | 6.262113   | 0.7279674  | 6.033353  | Trub2         | NM_145520    | Trub2            |
| 1452941_at   | 1.0315878  | 7.707354   | 0.8869638  | 7.4894347  | 0.8474194  | 7.423636   | 0.7776616  | 7.299702  | 0610038F07Rik | NM_025333    | 0610038F07Rik    |
| 1443390_at   | 0.9437355  | 6.1214194  | 1.0785636  | 6.3140764  | 1.204205   | 6.4730463  | 1.2652677  | 6.544408  | Dock1         | NM_194386    | Dock1            |
| 1451002_at   | 1.0003744  | 12.692021  | 0.89809906 | 12.536428  | 0.8138445  | 12.394306  | 0.8071491  | 12.382388 | Aco2          | NM_080633    | Aco2             |
| 1449243_a_at | 1.0012833  | 10.59328   | 1.14416    | 10.785718  | 1.1734785  | 10.82222   | 1.2474595  | 10.910421 | Rps19         | NM_023133    | Rps19            |
| 1424252_at   | 0.8907542  | 6.304924   | 0.4931913  | 5.452044   | 0.35917452 | 4.994581   | 0.3406456  | 4.918168  | Hnrpd1        | NM_016690    | Hnrpd1           |
| 1429534_a_at | 1.0367541  | 10.5293455 | 0.8228617  | 10.195993  | 0.74878955 | 10.059903  | 0.7638132  | 10.088564 | Immt          | NM_029673    | Immt             |
| 1438669_at   | 0.96310693 | 7.064455   | 1.1402333  | 7.308016   | 1.1259612  | 7.289844   | 1.1340432  | 7.3001623 | Wdr40a        | NM_026893    | Wdr40a           |
| 1423291_s_at | 1.0619249  | 7.6975985  | 1.5138892  | 8.209176   | 1.2938347  | 7.98257    | 1.6797742  | 8.359184  | Hyou1         | NM_021395    | Hyou1            |
| 1428544_at   | 1.0289834  | 8.241934   | 1.520682   | 8.805433   | 1.3960155  | 8.682067   | 1.5409904  | 8.824573  | 0610007L01Rik | NM_355643    | 0610007L01Rik    |
| 1428259_at   | 0.96600115 | 7.657297   | 0.78301734 | 7.354316   | 0.71504635 | 7.2233095  | 0.6595399  | 7.1067324 | 2310075M15Rik | NM_484128    | 2310075M15Rik    |
| 1428880_at   | 1.0281568  | 9.186865   | 0.8641525  | 8.936162   | 0.8503666  | 8.912961   | 0.8194465  | 8.859527  | 0610038F07Rik | NM_025333    | 0610038F07Rik    |
| 1416409_at   | 1.0056175  | 9.382485   | 0.82820463 | 9.102463   | 0.7232775  | 8.907024   | 0.6481239  | 8.748745  | Acox1         | NM_015729    | Acox1            |

|              |            |           |            |            |             |           |            |           |               |              |               |
|--------------|------------|-----------|------------|------------|-------------|-----------|------------|-----------|---------------|--------------|---------------|
| 1454256_s_at | 0.96123229 | 7.830146  | 0.83730984 | 7.6310215  | 0.70482725  | 7.38253   | 0.7154347  | 7.40408   | 1700113122Rik | NM_026865    | 1700113122Rik |
| 1426857_a_at | 1.0098127  | 9.760726  | 0.8102921  | 9.443153   | 0.6693635   | 9.1675005 | 0.57475775 | 8.947664  | Hsd12         | NM_024255    | Hsd12         |
| 1436297_a_at | 1.0003417  | 8.060593  | 1.2114148  | 8.336794   | 1.505059    | 8.6499195 | 1.4973108  | 8.642474  | Grina         | NM_023168    | Grina         |
| 1420365_a_at | 0.9355766  | 9.95162   | 0.6696455  | 9.469161   | 0.4420832   | 8.700082  | 0.5599818  | 9.2111435 | Hnrpa2b1      | NM_016806    | Hnrpa2b1      |
| 1425981_a_at | 1.0129516  | 6.4386835 | 0.8107083  | 6.1173735  | 0.7307926   | 5.9676523 | 0.7460164  | 5.997398  | Rbi2          | NM_011250    | Rbi2          |
| 1428235_at   | 1.0251614  | 11.237808 | 0.8658113  | 10.9940815 | 0.771171344 | 10.828095 | 0.7020953  | 10.691696 | Sdhb          | NM_025848    | Sdhb          |
| 1424828_a_at | 1.0106155  | 11.535326 | 0.8461792  | 11.279127  | 0.8198345   | 11.233497 | 0.7382163  | 11.082208 | Fh1           | NM_010209    | Fh1           |
| 1432367_a_at | 1.0160626  | 7.144533  | 0.87377214 | 6.9268723  | 0.8058629   | 6.8101497 | 0.8383251  | 6.8671255 | Ufd11         | NM_011672    | Ufd11         |
| 1424639_a_at | 1.0384245  | 9.27158   | 0.8640969  | 9.006449   | 0.85014194  | 8.98296   | 0.73016775 | 8.763484  | Hmgcl         | NM_008254    | Hmgcl         |
| 1426365_at   | 1.0100138  | 7.5927715 | 0.8370439  | 7.3217716  | 0.71143776  | 7.087206  | 0.6192508  | 6.886992  | 2810403A07Rik | NM_028814    | 2810403A07Rik |
| 1428049_a_at | 1.0412947  | 6.677757  | 0.8391475  | 6.3663745  | 0.7133231   | 6.1320057 | 0.6687203  | 6.038853  | Nudt1611      | NM_025848    | Nudt1611      |
| 1434488_at   | 0.98943114 | 7.60164   | 0.83671397 | 7.359775   | 0.8125303   | 7.3174624 | 0.7559945  | 7.213417  | Arfrp1        | NM_029702    | Arfrp1        |
| 1441444_at   | 0.927103   | 5.2114387 | 1.345562   | 5.748846   | 1.493139    | 5.898986  | 1.1999497  | 6.184536  | Carf          | AK030441     | Nbeal1        |
| 1429339_a_at | 1.0426657  | 6.350545  | 0.80463654 | 5.976678   | 0.7497872   | 5.8748217 | 0.6587189  | 5.688003  | Acad10        | NM_028037    | Acad10        |
| 1427482_a_at | 1.0525777  | 6.365237  | 0.8158528  | 5.997691   | 0.7613099   | 5.897866  | 0.5342207  | 5.386818  | Car8          | NM_007592    | Car8          |
| 1427992_a_at | 1.0318401  | 9.505549  | 0.88798714 | 9.288941   | 0.8138395   | 9.163147  | 0.72844464 | 9.0032215 | Rab12         | NM_024448    | Rab12         |
| 1425568_a_at | 0.9921306  | 7.6233444 | 1.4629089  | 8.103583   | 1.2977197   | 8.010722  | 1.5992019  | 8.312095  | Tmem33        | NM_028975    | Tmem33        |
| 1435222_at   | 0.9834715  | 6.7079988 | 1.2133034  | 6.189844   | 0.7145819   | 6.1736687 | 1.458191   | 7.5341697 | Foxp1         | NM_053202    | Foxp1         |
| 1424839_a_at | 1.0122287  | 7.9512963 | 0.8682068  | 7.729871   | 0.81038505  | 7.6304398 | 0.7296486  | 7.4790344 | 2810405F18Rik | NM_028142    | 2810405F18Rik |
| 1428528_at   | 1.0220892  | 8.737423  | 0.87388957 | 8.511425   | 0.7989987   | 8.382168  | 0.7011318  | 8.193659  | 1110007L15Rik | NM_026269    | 1110007L15Rik |
| 1417223_at   | 1.0161439  | 6.964447  | 0.87959504 | 6.7382536  | 0.86560005  | 6.7151146 | 0.74283797 | 6.494462  | Cd2bp2        | NM_027353    | Cd2bp2        |
| 1449045_at   | 1.0044615  | 7.5327115 | 0.8769407  | 7.33684    | 0.80094445  | 7.2060633 | 0.7809639  | 7.1696167 | Afg3p1        | NM_025400    | Afg3p1        |
| 1455491_at   | 0.9252406  | 7.0308404 | 0.705753   | 6.6401753  | 0.55720747  | 6.2992263 | 0.5864148  | 6.3729334 | LOC432467     | XM_483910    | Hnrhp3        |
| 1441505_at   | 0.91740286 | 5.8472013 | 1.2917182  | 6.3408656  | 1.3207116   | 6.3728895 | 1.3392864  | 6.3930383 |               | BB211484     | ---           |
| 1434060_at   | 0.9690139  | 6.8953333 | 0.78199524 | 6.585976   | 0.7788283   | 6.580121  | 0.65528595 | 6.330941  | Herc1         | XM_620756    | Herc1         |
| 1434105_at   | 1.0076406  | 7.6920857 | 0.8640493  | 7.4702897  | 0.74563366  | 7.257643  | 0.6839959  | 7.1331644 | Epm2aip1      | NM_175266    | Epm2aip1      |
| 1424155_at   | 0.85135907 | 6.964951  | 0.47050261 | 6.109388   | 0.25932112  | 5.249923  | 0.2564458  | 5.2338376 | Fabp4         | NM_024406    | Fabp4         |
| 1428071_at   | 1.0116982  | 7.947966  | 0.86910623 | 7.728791   | 0.8752157   | 7.7388973 | 0.7368295  | 7.490589  | 1110038D17Rik | XM_483920    | 1110038D17Rik |
| 1428065_at   | 0.9846     | 8.56686   | 0.81076133 | 8.2866     | 0.7582317   | 8.189961  | 0.62085366 | 7.901576  | Slc44a2       | NM_152808    | Slc44a2       |
| 1423447_at   | 0.95091105 | 9.387907  | 0.71812606 | 8.982834   | 0.54102767  | 8.574299  | 0.5099038  | 8.488821  | Cjpx          | NM_011802    | Cjpx          |
| 1447240_at   | 0.9345325  | 5.5036836 | 1.2315726  | 5.9018683  | 1.2836618   | 5.961632  | 1.1572857  | 5.812112  |               | BB462614     | ---           |
| 1441747_at   | 0.9101126  | 5.408729  | 1.1532997  | 5.75038    | 1.224535    | 5.838464  | 1.536493   | 6.1642537 | Calu          | NM_007594    | Calu          |
| 1419920_s_at | 0.9833536  | 8.037725  | 0.8858693  | 7.8871098  | 0.76915324  | 7.683286  | 0.8515399  | 7.830909  | Usp7          | NM_001003918 | Usp7          |
| 1448199_at   | 0.96015066 | 6.887168  | 0.82652384 | 6.670964   | 0.691767    | 6.4141936 | 0.7149935  | 6.4618373 | Ankrd10       | NM_133971    | Ankrd10       |
| 1454735_at   | 1.0092574  | 7.071991  | 0.8395906  | 6.806457   | 0.7696499   | 6.6809707 | 0.780977   | 6.7020483 | Odf2          | NM_013615    | Odf2          |
| 1455013_at   | 1.0319543  | 7.4386    | 0.89367354 | 7.2310414  | 0.8489474   | 7.1569686 | 0.82925934 | 7.1231165 | Arih2         | NM_011790    | Arih2         |
| 1428301_at   | 0.92206144 | 7.6440115 | 0.48853812 | 6.727619   | 0.31960785  | 6.115451  | 0.29716557 | 6.0104156 | LOC544986     | NM_001024712 | LOC544986     |
| 1419630_a_at | 0.92218416 | 6.475321  | 0.8460788  | 6.2455044  | 0.8373901   | 6.2306128 | 0.71992743 | 6.012564  | Trim11        | NM_025618    | Trim11        |
| 1423044_at   | 1.0044065  | 8.952343  | 0.8529604  | 8.71655    | 0.7832483   | 8.593541  | 0.8132806  | 8.647825  | Prosc         | NM_054057    | Prosc         |
| 1455045_at   | 1.0060469  | 7.5904818 | 1.2133219  | 7.860747   | 1.1343206   | 7.763613  | 1.1321323  | 7.760827  | Srr           | NM_013761    | Srr           |
| 1451084_at   | 0.98931056 | 11.47553  | 0.78116643 | 11.134737  | 0.711989    | 11.00962  | 0.67093486 | 10.915279 | Etfhdh        | NM_025794    | Etfhdh        |
| 1448143_at   | 1.0938636  | 9.705635  | 0.7350308  | 9.132078   | 0.6524556   | 8.960155  | 0.5142423  | 8.616722  | Aldh2         | NM_009656    | Aldh2         |
| 1437077_at   | 1.0133708  | 8.4644375 | 0.8353556  | 8.185738   | 0.77009106  | 8.068377  | 0.73646563 | 8.003965  | AW495713      | BC052676     | AW495713      |
| 1428083_at   | 0.7543752  | 9.41721   | 0.41783535 | 8.564862   | 0.1834706   | 7.3774767 | 0.24228284 | 7.77862   | 2310043N10Rik | AK028745     | 2310043N10Rik |
| 1450102_a_at | 0.99133193 | 9.38976   | 1.1372317  | 9.587847   | 1.2122612   | 9.680021  | 1.2529029  | 9.727595  | Amfr          | NM_011787    | Amfr          |
| 1433829_a_at | 0.89930266 | 9.257479  | 0.5738641  | 8.609382   | 0.34864822  | 7.8904448 | 0.35125667 | 7.901198  | Hnrpa2b1      | NM_182650    | Hnrpa2b1      |
| 1416979_at   | 0.9908828  | 9.881251  | 0.8758806  | 9.703271   | 0.7854471   | 9.546101  | 0.8028603  | 9.577685  | 2510048O06Rik | NM_025624    | 2510048O06Rik |
| 1451776_s_at | 1.0233387  | 10.203855 | 0.82844734 | 9.899054   | 0.7934766   | 9.83683   | 0.68290085 | 9.620319  | Hod3          | NM_175606    | MGI:1916782   |
| 1435555_at   | 0.9687091  | 6.1854873 | 0.84974825 | 5.996459   | 0.8212641   | 5.9472694 | 0.75095385 | 5.8181477 | Cdx2          | NM_031162    | ---           |
| 1460631_at   | 0.96643996 | 8.552055  | 0.76504135 | 8.214912   | 0.6625265   | 8.007353  | 0.6465908  | 7.9722276 | Ogt           | NM_139144    | Ogt           |
| 1441581_at   | 1.0486938  | 8.162378  | 0.8508177  | 7.8607073  | 0.736697    | 7.652928  | 0.62187    | 7.40847   | Asb10         | NM_080444    | Asb10         |
| 1449044_at   | 1.0074824  | 8.26904   | 1.215028   | 8.539275   | 1.2518945   | 8.582399  | 1.4288832  | 8.773173  | Eef1e1        | NM_025380    | Eef1e1        |
| 1419247_at   | 0.9792476  | 8.262332  | 1.2336038  | 8.595466   | 1.6383448   | 9.004826  | 1.8184713  | 9.155313  | Rgs2          | NM_009061    | Rgs2          |
| 1418835_at   | 1.0583755  | 9.140944  | 0.8334039  | 8.796179   | 0.5790406   | 8.270827  | 0.6601776  | 8.460018  | Phida1        | NM_009344    | Phida1        |
| 1438183_x_at | 1.030601   | 8.630691  | 1.3324796  | 9.001318   | 1.7951458   | 9.431305  | 1.4371779  | 9.110444  | Sdh1          | NM_146126    | Sdh1          |
| 1434792_at   | 1.0293741  | 6.4293904 | 0.8190207  | 6.099959   | 0.7718734   | 6.014059  | 0.6915477  | 5.855523  | 2010320M18Rik | CA321000     | 2010320M18Rik |
| 1418699_s_at | 1.0301604  | 9.390132  | 0.9000773  | 9.195384   | 0.8593938   | 9.1286545 | 0.705421   | 8.84382   | Fech          | NM_007998    | Fech          |
| 1460580_at   | 0.9909496  | 6.7319336 | 0.86739486 | 6.539811   | 0.7606199   | 6.350298  | 0.7767961  | 6.380658  | Pcnx          | NM_018814    | Pcnx          |
| 1417480_at   | 1.0144162  | 8.072288  | 0.7076322  | 7.5527096  | 0.6001292   | 7.314983  | 0.5496374  | 7.1881905 | Fbxo9         | NM_023605    | Fbxo9         |
| 1416023_at   | 0.9983374  | 13.150541 | 0.93132204 | 13.050294  | 8.9657436   | 12.961523 | 0.8226065  | 12.871216 | Fabp3         | NM_010174    | Fabp3         |
| 1416716_at   | 0.98577446 | 5.8824105 | 0.8753567  | 5.7110243  | 1.1013697   | 6.04238   | 1.1164119  | 6.0619507 | Efs           | NM_010112    | Efs           |
| 1429694_at   | 0.92018205 | 5.513204  | 1.2124913  | 5.911187   | 1.3726116   | 6.090136  | 1.5472806  | 6.2629476 | 4930402H24Rik | NM_029432    | 4930402H24Rik |
| 1438559_x_at | 0.9170845  | 7.1769753 | 0.67666173 | 6.7383556  | 0.67733824  | 6.739797  | 0.43271756 | 6.0933466 | Slc44a2       | NM_152808    | Slc44a2       |
| 1428299_at   | 0.99413276 | 7.2443624 | 1.1420065  | 7.4444227  | 1.0527209   | 7.326975  | 1.1542639  | 7.459825  | Dyrk1a        | XM_622706    | Dyrk1a        |
| 1448381_at   | 0.9775227  | 7.4716334 | 0.7637581  | 7.115619   | 0.6228433   | 6.8213725 | 0.61311924 | 6.798671  | Gfm1          | NM_138591    | Gfm1          |
| 1430286_s_at | 1.0427786  | 8.734665  | 0.89446026 | 8.513322   | 0.90445507  | 8.529352  | 0.79696554 | 8.346822  | Ppp1r14c      | NM_133485    | Ppp1r14c      |
| 1434773_a_at | 1.0601261  | 7.2768383 | 1.3234788  | 7.5969377  | 1.6460383   | 7.9116006 | 1.6959969  | 7.9547358 | Slc2a1        | NM_011400    | Slc2a1        |
| 1447908_x_at | 0.96718526 | 9.57983   | 1.0601681  | 9.712259   | 1.1407827   | 9.81799   | 1.2150277  | 9.908955  | Ttc3          | NM_009441    | Ttc3          |
| 1416497_at   | 1.0180023  | 6.827701  | 1.2302673  | 7.100932   | 1.2821622   | 7.160539  | 1.7393881  | 7.6005406 | Pdia4         | NM_009787    | Pdia4         |
| 1424299_at   | 1.003198   | 7.7566147 | 0.8914977  | 7.586311   | 0.8423294   | 7.504464  | 0.7613306  | 7.358603  | Oma1          | NM_025909    | Oma1          |
| 1417826_at   | 1.0391521  | 7.299814  | 0.9489352  | 7.1687884  | 0.89798135  | 7.0891647 | 0.8189821  | 6.956311  | Akr1e1        | NM_018859    | Akr1e1        |
| 1423976_at   | 1.0306544  | 7.9932833 | 1.2285521  | 8.246681   | 1.3348317   | 8.366381  | 1.514246   | 8.548323  | 4930453N24Rik | XM_148353    | 4930453N24Rik |
| 1448170_at   | 0.99201655 | 6.72544   | 1.2022893  | 7.002788   | 1.2651347   | 7.076295  | 1.6918236  | 7.4955835 | Siah2         | NM_009174    | Siah2         |
| 1426584_a_at | 1.0090271  | 10.229732 | 1.2129098  | 10.495238  | 1.4466602   | 10.749492 | 1.3475051  | 10.647057 | Sdh1          | NM_146126    | Sdh1          |
| 1425780_a_at | 1.010519   | 7.5886106 | 1.198313   | 7.834518   | 1.1961987   | 7.8319707 | 1.4668523  | 8.126237  | 0610041E09Rik | NM_025335    | 0610041E09Rik |
| 1450908_at   | 1.0138726  | 0.911104  | 0.8830271  | 10.711695  | 0.72674084  | 10.430678 | 1.7548994  | 10.485521 | Eif4e         | NM_007917    | Eif4e         |
| 1416633_a_at | 1.0102957  | 9.688307  | 1.1675533  | 9.8970175  | 1.244721    | 9.989351  | 1.2318851  | 9.974396  | 5730536A07Rik | NM_026635    | 5730536A07Rik |
| 1426763_at   |            |           |            |            |             |           |            |           |               |              |               |

|              |            |            |            |            |            |            |            |           |                |           |                 |
|--------------|------------|------------|------------|------------|------------|------------|------------|-----------|----------------|-----------|-----------------|
| 1447780_x_at | 1.0133429  | 8.55724    | 0.8678985  | 8.333716   | 0.7977762  | 8.212173   | 0.6650001  | 7.9495444 | Tufm           | NM_172745 | Tufm            |
| 1423690_s_at | 1.0321128  | 8.974739   | 0.8644257  | 8.718952   | 0.7360924  | 8.48711    | 0.6614056  | 8.332745  | Gpsm1          | NM_153410 | Gpsm1           |
| 1439658_at   | 1.0151479  | 9.277784   | 0.85301256 | 9.026733   | 0.72796017 | 8.798025   | 0.71311414 | 8.768299  | Lmod3          | XM_149772 | Lmod3           |
| 1423689_a_at | 1.0337232  | 8.670851   | 0.80839473 | 8.316133   | 0.65464026 | 8.011775   | 0.56020397 | 7.787025  | Gpsm1          | NM_153410 | Gpsm1           |
| 1454733_at   | 1.0008091  | 7.3225093  | 0.83930004 | 7.068601   | 0.7401587  | 6.887249   | 0.71473324 | 6.8368196 | Card4          | NM_172729 | Card4           |
| 1422997_s_at | 1.0836997  | 7.7261667  | 0.83260447 | 7.345905   | 0.79703456 | 7.2829156  | 0.54744667 | 6.7409916 | Cte1           | NM_012006 | Acot1 /// Acot2 |
| 1448882_at   | 1.0106856  | 8.627481   | 0.8734026  | 8.416865   | 0.84570235 | 8.370369   | 0.734225   | 8.166442  | O610009E20Rik  | NM_025318 | O610009E20Rik   |
| 1421875_a_at | 1.0081193  | 9.463438   | 0.89182156 | 9.286598   | 0.84250426 | 9.204527   | 0.7384683  | 9.0143795 | Mrps23         | NM_024174 | Mrps23          |
| 1452148_at   | 1.0179712  | 7.123771   | 0.85870886 | 6.8783154  | 0.77687025 | 6.73382    | 0.6780688  | 6.537578  | Lrpap1         | NM_013587 | Lrpap1          |
| 1442001_at   | 0.99479955 | 6.652538   | 0.76820916 | 6.279631   | 0.6673709  | 6.0766206  | 0.60731137 | 5.940568  | Prkab2         | NM_182997 | Prkab2          |
| 1435855_x_at | 0.97814506 | 5.6548896  | 1.5007669  | 6.2724695  | 1.2316079  | 5.9873123  | 1.2819209  | 6.0450764 | Aldh18a1       | NM_019698 | Aldh18a1        |
| 1435755_at   | 1.0500314  | 8.52612    | 0.8800332  | 8.2711318  | 0.7734355  | 8.08504    | 0.78332955 | 8.103379  | 1110001A16Rik  | CB202701  | 1110001A16Rik   |
| 1419174_at   | 1.0221218  | 8.459026   | 0.90917575 | 8.2900915  | 0.89813805 | 8.2724695  | 0.8111219  | 8.12545   | 2410004B18Rik  | NM_025555 | 2410004B18Rik   |
| 1451221_at   | 0.9555166  | 6.1576357  | 0.7436509  | 5.79598    | 0.6054045  | 5.499254   | 0.57148355 | 5.4160666 | BC018507       | XM_358313 | BC018507        |
| 1422676_at   | 1.0192219  | 6.6151032  | 0.84642696 | 6.3470926  | 0.7509624  | 6.174448   | 0.7927578  | 6.252588  | Smarce1        | NM_020618 | Smarce1         |
| 1456018_at   | 0.977468   | 7.261099   | 0.8077128  | 6.985892   | 0.7774726  | 6.9308414  | 0.75541395 | 6.8893166 | AL022779       | XM_127436 | AL022779        |
| 1450917_at   | 1.050967   | 10.755481  | 0.658213   | 10.080389  | 0.57431656 | 9.883681   | 0.517247   | 9.732688  | Myom2          | NM_008664 | Myom2           |
| 1450840_a_at | 1.0177287  | 12.426125  | 1.1382487  | 12.587587  | 1.1754699  | 12.340402  | 1.2255999  | 12.69426  | Rpl39          | NM_026055 | Rpl39           |
| 1448134_at   | 0.9766882  | 6.449419   | 0.8558558  | 6.2588887  | 0.7840354  | 6.1324396  | 0.6695003  | 5.9046054 | X99384         | NM_013753 | X99384          |
| 1437196_x_at | 1.0188447  | 12.643641  | 1.0827398  | 12.731394  | 1.1497395  | 12.818014  | 1.1604612  | 12.831406 | Rps16          | NM_013587 | Rps16           |
| 1452648_at   | 1.0335182  | 8.340074   | 1.1591856  | 8.505622   | 1.2884704  | 8.658171   | 1.4361602  | 8.814727  | Tbrg1          | NM_025289 | Tbrg1           |
| 1423617_at   | 1.046363   | 8.888909   | 0.9464913  | 8.734088   | 0.8803032  | 8.292499   | 0.796652   | 8.485448  | Coq8           | NM_193229 | Coq8            |
| 1451427_a_at | 0.9971708  | 8.01708    | 0.7956821  | 7.6914306  | 0.57101965 | 7.212779   | 0.5353947  | 7.1198416 | Egfl7          | NM_178444 | Egfl7           |
| 1448530_at   | 1.0187398  | 9.32955    | 0.85219574 | 9.072025   | 0.91737664 | 9.17835    | 0.7975167  | 8.976351  | Gmpr           | NM_025508 | Gmpr            |
| 1428919_at   | 1.0043831  | 7.069968   | 0.7885178  | 6.7208734  | 0.6521818  | 6.447005   | 0.5993455  | 6.325118  | Fgfr10p        | NM_201230 | Fgfr10p         |
| 1460702_at   | 1.0183226  | 6.714116   | 0.8042136  | 6.373567   | 0.79207915 | 6.351633   | 0.6714448  | 6.1132574 | 1810015M01Rik  | NM_026933 | 1810015M01Rik   |
| 1451428_x_at | 0.9851892  | 7.972202   | 0.6994892  | 7.4781027  | 0.6199001  | 7.3038363  | 0.5427137  | 7.1119924 | Egfl7          | NM_178444 | Egfl7           |
| 1424510_at   | 1.030979   | 7.33318    | 0.8811245  | 7.1065826  | 0.8542732  | 7.0619345  | 0.6365378  | 6.6374826 | Nudt6          | NM_153561 | Nudt6           |
| 1416436_a_at | 1.0542183  | 8.521247   | 0.8473778  | 8.20615    | 0.75062823 | 8.031242   | 0.6494887  | 7.8224487 | 2410003P15Rik  | NM_018888 | 2410003P15Rik   |
| 1435292_at   | 0.95823425 | 7.7058215  | 0.83783907 | 7.512116   | 0.7324909  | 7.318254   | 0.6738957  | 7.1979685 | Tbc1d4         | XM_619278 | Tbc1d4          |
| 1456015_x_at | 1.0304665  | 10.640045  | 0.90387356 | 10.45094   | 0.85582227 | 10.372131  | 0.7611663  | 10.203032 | Nudt10         | NM_133666 | Nudt10          |
| 1418569_at   | 0.9909124  | 8.779526   | 0.8569464  | 8.569973   | 0.80092376 | 8.472433   | 0.65679085 | 8.186202  | Fblm1          | NM_133754 | Fblm1           |
| 1452579_at   | 1.0326731  | 10.626053  | 0.8847382  | 10.402991  | 0.86629415 | 10.372598  | 0.7818408  | 10.224615 | Nifun          | NM_025526 | Nifun           |
| 1455061_a_at | 1.0278755  | 10.953404  | 0.85955083 | 10.6953945 | 0.84672576 | 10.673706  | 0.6477468  | 10.287241 | Acaa2          | NM_177470 | Acaa2           |
| 1425425_a_at | 0.96454847 | 5.9453707  | 0.69423527 | 5.4709415  | 0.5688645  | 5.1836023  | 0.3435878  | 4.4561963 | Wf1            | NM_011915 | Wf1             |
| 1449000_at   | 1.0592492  | 11.379277  | 0.79968256 | 10.7973735 | 0.5093553  | 10.939553  | 0.6598512  | 10.696448 | D10Jhu81e      | NM_138601 | D10Jhu81e       |
| 1422126_a_at | 1.0340247  | 6.3945675  | 0.7850191  | 5.997096   | 0.8079733  | 6.0386763  | 0.62323326 | 5.6641407 | Nudt13         | NM_026341 | Nudt13          |
| 1436934_s_at | 1.003288   | 12.096792  | 0.8883868  | 11.921324  | 11.807728  | 11.807728  | 0.79086864 | 11.753567 | Acco2          | NM_080633 | Acco2           |
| 1451500_at   | 0.93393964 | 6.9830213  | 0.7666616  | 6.698282   | 0.7412939  | 6.6497374  | 0.57868636 | 6.292474  | Ushbp1         | NM_181418 | Ushbp1          |
| 1418034_at   | 1.0149423  | 7.7561393  | 0.82973903 | 7.465471   | 0.8069005  | 7.4252043  | 0.6918569  | 7.203287  | Mrps9          | NM_023514 | Mrps9           |
| 1424661_at   | 1.0334932  | 9.0115     | 0.8543939  | 8.736945   | 0.79189193 | 8.627346   | 0.75526685 | 8.55903   | Pmpca          | NM_173180 | Pmpca           |
| 1426219_at   | 0.9839452  | 10.496403  | 0.7160004  | 10.037785  | 0.5810065  | 9.736381   | 0.5300244  | 9.603884  | Scp2           | NM_011327 | Scp2            |
| 1436048_at   | 0.98692393 | 7.237933   | 1.1536369  | 7.4631114  | 1.2961516  | 7.6311574  | 1.3559347  | 7.6962104 | Exoc8          | NM_198103 | Exoc8           |
| 1449481_at   | 1.007276   | 9.746117   | 0.88424414 | 9.558174   | 0.7606151  | 9.340896   | 0.71515447 | 9.251985  | Slc25a13       | NM_015829 | Slc25a13        |
| 1424346_at   | 1.0112073  | 8.158852   | 1.1525521  | 8.347605   | 1.2561     | 8.471724   | 1.3829936  | 8.610567  | Ppp6c          | NM_024209 | Ppp6c           |
| 1448372_a_at | 0.99653906 | 8.449357   | 1.1276522  | 8.627862   | 1.158805   | 8.666997   | 1.2812816  | 8.811947  | Tmem4          | NM_019953 | Tmem4           |
| 1422759_a_at | 1.0522655  | 6.2618866  | 0.6491778  | 5.710217   | 0.61263674 | 5.6266356  | 0.59300834 | 5.5796556 | Xp06           | NM_020816 | Xp06            |
| 1417701_at   | 0.99477756 | 10.594785  | 0.80269647 | 10.285265  | 0.65180224 | 9.984845   | 0.65498036 | 9.991862  | Ppp1r14c       | NM_133485 | Ppp1r14c        |
| 1453173_at   | 1.0154252  | 7.5853333  | 0.8668348  | 7.357078   | 0.8735109  | 7.368147   | 0.73552567 | 7.1200967 | 2310005E10Rik  | NM_172398 | 2310005E10Rik   |
| 1428906_at   | 1.0146686  | 8.587909   | 0.92387396 | 8.452668   | 0.8427788  | 8.320126   | 0.79890585 | 8.242997  | Gif2h5         | NM_181392 | Gif2h5          |
| 1436939_at   | 0.9955134  | 10.0867605 | 1.2198449  | 10.269372  | 0.86273634 | 9.8802395  | 0.80195683 | 9.774844  | Unc45b         | NM_178680 | Cmya4           |
| 1416788_a_at | 1.0235587  | 11.837569  | 0.8498091  | 11.569186  | 0.8293654  | 11.534056  | 0.7615826  | 11.411049 | Ihd3g          | NM_008323 | Ihd3g           |
| 1428134_at   | 1.0326321  | 11.520054  | 0.86557    | 11.2654505 | 0.8629815  | 11.261129  | 0.68794066 | 10.934084 | 2310005O14Rik  | NM_026452 | 2310005O14Rik   |
| 1415830_at   | 1.0617346  | 6.2143583  | 0.8816433  | 5.9462013  | 0.78850466 | 5.7851257  | 0.7004374  | 5.6142626 | Orc5l          | NM_011959 | Orc5l           |
| 1426743_at   | 0.98875463 | 8.040448   | 0.8121694  | 7.7566156  | 0.71879864 | 7.580423   | 0.6427263  | 7.4190397 | Dip3b          | NM_145220 | MG1:2384914     |
| 1428337_at   | 1.0174855  | 7.9309483  | 0.7168842  | 7.425712   | 0.6308591  | 7.24133    | 0.6420599  | 7.2667203 | 18n10034K20Rik | NM_023397 | 18n10034K20Rik  |
| 1440537_at   | 1.0115917  | 6.362615   | 0.7967542  | 6.0181947  | 0.7171245  | 5.866284   | 0.57639384 | 5.551115  | Kcnv2          | NM_183179 | Kcnv2           |
| 1423780_at   | 1.0208981  | 10.826011  | 0.8346874  | 10.53548   | 0.7505878  | 10.382264  | 0.6572746  | 10.19074  | Hibadh         | NM_145567 | Hibadh          |
| 1416207_at   | 1.0229685  | 8.133917   | 0.83926344 | 7.8483515  | 0.8064125  | 7.7907457  | 0.67891973 | 7.542469  | Taz            | NM_181516 | Taz             |
| 1437325_x_at | 0.94276357 | 5.9622645  | 2.3198502  | 7.261328   | 1.3864472  | 6.518689   | 1.9231284  | 6.9907513 | Aldh18a1       | NM_019698 | Aldh18a1        |
| 1428290_at   | 1.0322273  | 8.76956    | 0.8735152  | 8.528704   | 0.8740159  | 8.52953    | 0.79269356 | 8.388634  | Mipep          | NM_027436 | Mipep           |
| 1434870_at   | 1.0008193  | 7.662782   | 0.7855114  | 7.3133044  | 0.6366882  | 7.0102596  | 0.60831153 | 6.944483  | O610039J04Rik  | NM_025615 | O610039J04Rik   |
| 1428892_at   | 1.0186433  | 8.433254   | 0.7127869  | 7.918148   | 0.76839256 | 8.026521   | 0.5729237  | 7.60302   | Ppil1          | NM_026845 | Ppil1           |
| 1415704_a_at | 0.98272985 | 9.96442    | 1.2235311  | 10.280605  | 1.2137293  | 10.269     | 1.7507393  | 10.797517 | Cdv3           | NM_175565 | Cdv3            |
| 1415966_a_at | 1.0331838  | 10.653591  | 0.8674047  | 10.401272  | 0.8180947  | 10.3168335 | 0.7199482  | 10.13246  | Ndufv1         | NM_133666 | Ndufv1          |
| 1425507_at   | 0.9999007  | 8.463862   | 0.8765691  | 8.273945   | 0.8761321  | 8.273225   | 0.75838226 | 8.065002  | Arfrp1         | NM_029702 | Arfrp1          |
| 1456211_at   | 1.000007   | 6.919752   | 0.8276629  | 6.6468577  | 0.66084    | 6.322115   | 0.6467751  | 6.2910786 | Nalp10         | NM_175532 | ---             |
| 1428255_at   | 0.972749   | 7.035789   | 0.7434533  | 6.6479635  | 0.6608509  | 6.4780464  | 0.58357704 | 6.2986445 | Luc7l          | NM_025881 | Luc7l           |
| 1456702_x_at | 0.967068   | 9.594167   | 0.81721425 | 9.351264   | 0.69708914 | 9.121893   | 0.6002243  | 8.906052  | Mat2a          | NM_145569 | Mat2a           |
| 1415814_at   | 0.9982151  | 8.684368   | 0.85619533 | 8.462957   | 0.6876865  | 8.146769   | 0.69745344 | 8.167114  | At6pv1b2       | NM_007509 | At6pv1b2        |
| 1417892_a_at | 1.0462795  | 8.610939   | 0.8384549  | 8.291475   | 0.81476057 | 8.250118   | 0.63301843 | 7.885989  | Sirt3          | NM_022433 | Sirt3           |
| 1448987_at   | 1.0013409  | 12.466678  | 0.86584747 | 12.256929  | 0.8060551  | 12.153696  | 0.73256916 | 12.015781 | Acadl          | NM_007381 | Acadl           |
| 1420776_a_at | 1.0357244  | 9.924448   | 0.880707   | 9.690542   | 0.8141145  | 9.577111   | 0.71142083 | 9.382583  | Auh            | NM_016709 | Auh             |
| 1419499_at   | 0.96396613 | 10.521328  | 0.81828964 | 10.284958  | 0.7744859  | 10.2055855 | 0.6800216  | 10.017927 | Gpam           | NM_008149 | Gpam            |
| 1457447_at   | 0.91932726 | 5.67769    | 1.2646476  | 6.1377753  | 1.2664192  | 6.139795   | 1.3882723  | 6.2723303 | Rb1            | NM_009029 | P2y5            |
| 1428943_at   | 1.0259024  | 6.8327894  | 0.91436    | 6.66673    | 0.8514337  | 6.563862   | 0.738909   | 6.3593645 | Nudt13         | NM_026341 | Nudt13          |
| 1452076_at   | 1.0226555  | 8.016871   | 0.8817681  | 7.8030224  | 0.7698158  | 7.6071367  | 0.68424696 | 7.437141  | 4633402N23Rik  | N         |                 |

|              |            |           |            |            |            |           |            |           |               |              |               |
|--------------|------------|-----------|------------|------------|------------|-----------|------------|-----------|---------------|--------------|---------------|
| 1425508_s_at | 1.0030689  | 7.582263  | 0.8293259  | 7.3078527  | 0.7138344  | 7.0915036 | 0.61407775 | 6.8743353 | Arfrp1        | NM_029702    | Arfrp1        |
| 1427166_a_at | 1.0453435  | 7.7507086 | 0.7442658  | 7.2606215  | 0.6536901  | 7.0734105 | 0.5986874  | 6.9466066 | Ryk           | NM_013649    | Ryk /// Spg7  |
| 1431431_a_at | 1.0187119  | 7.953989  | 0.86045545 | 7.7104053  | 0.69343543 | 7.3990664 | 0.6549049  | 7.3165903 | Nfs1          | NM_010911    | Nfs1          |
| 1429823_at   | 1.0394678  | 7.5083814 | 0.85144365 | 7.2205919  | 0.8459699  | 7.211215  | 0.7247501  | 6.9880915 | Pcca          | NM_011892    | 5430420E18Rik |
| 1451405_at   | 0.9932878  | 9.380817  | 0.86078364 | 9.174255   | 0.73707366 | 8.950414  | 0.71765393 | 8.911895  | Pcca          | NM_144844    | Pcca          |
| 1456396_at   | 1.0165325  | 7.2556376 | 0.7268907  | 6.7717915  | 0.55800074 | 6.3903203 | 0.54670143 | 6.360807  | BI687503      | NM_144844    | Xpo4          |
| 1453740_a_at | 0.9732676  | 7.6488523 | 0.6264059  | 7.0131133  | 0.5245703  | 6.7571516 | 0.5172026  | 6.7367454 | Ccnl2         | NM_108856    | Ccnl2         |
| 1448095_at   | 0.96901447 | 7.1715403 | 0.8517239  | 6.9854083  | 0.83470434 | 6.9562874 | 0.6965982  | 6.6953487 | BI080569      | ---          | ---           |
| 1450514_at   | 0.96502084 | 7.366662  | 0.71038485 | 6.924661   | 0.5221658  | 6.4805684 | 0.5165586  | 6.4649925 | Arhgap9       | NM_146011    | Arhgap9       |
| 1452685_at   | 1.0390218  | 8.792432  | 0.83578455 | 8.47841    | 0.74861    | 8.319492  | 0.58622277 | 7.966727  | O610009O20Rik | NM_024179    | O610009O20Rik |
| 1424249_a_at | 1.023288   | 9.397813  | 0.86712766 | 9.158916   | 0.75579333 | 8.960665  | 0.71318364 | 8.8769455 | 2310039E09Rik | NM_026509    | 2310039E09Rik |
| 1416826_a_at | 1.0034449  | 6.8268504 | 0.76460713 | 6.4346795  | 0.57172763 | 6.0152893 | 0.4859862  | 5.780876  | Trfp          | NM_020048    | Trfp          |
| 1433672_at   | 1.0109556  | 8.191677  | 0.8639662  | 7.965004   | 0.8591267  | 7.956899  | 0.71197087 | 7.685847  | 4732479N06Rik | NM_172540    | 4732479N06Rik |
| 1415899_at   | 1.0378917  | 6.650871  | 0.837202   | 6.3408628  | 1.2645772  | 6.93587   | 1.5432779  | 7.2232127 | Junb          | NM_008416    | Junb          |
| 1427988_s_at | 0.98419964 | 6.602002  | 0.8346127  | 6.3641577  | 0.7105969  | 6.132083  | 0.7529518  | 6.2156086 | Safb2         | NM_001029979 | Safb2         |
| 1435261_at   | 0.97796977 | 8.774454  | 0.8354097  | 8.547149   | 0.60552716 | 8.082857  | 0.6997663  | 8.291538  | 4732416N19Rik | NM_0033816   | 4732416N19Rik |
| 1438976_x_at | 0.9697026  | 8.340683  | 0.8275403  | 8.111971   | 0.7146202  | 7.900317  | 0.61166126 | 7.6758738 | Mat2a         | NM_145569    | Mat2a         |
| 1443833_at   | 1.0002184  | 6.515174  | 0.7256673  | 6.052239   | 0.5046406  | 5.528084  | 0.48793307 | 5.4796143 | BE945021      | NM_145569    | BE945021      |
| 1450667_a_at | 0.99876404 | 12.138543 | 0.8642715  | 11.929884  | 0.7551388  | 11.735141 | 0.699911   | 11.62557  | Cs            | NM_026444    | Cs            |
| 1454075_s_at | 1.0099553  | 7.739229  | 0.82572293 | 7.4486675  | 0.8079382  | 7.4172544 | 0.7431997  | 7.2967596 | Nudt13        | NM_026341    | Nudt13        |
| 1422577_at   | 1.0062451  | 10.916782 | 0.75685424 | 10.505888  | 0.638626   | 10.260843 | 0.63339764 | 10.248983 | Cs            | NM_026444    | Cs            |
| 1419367_at   | 1.02520417 | 11.155929 | 0.7728431  | 10.748494  | 0.718003   | 10.642307 | 0.6030608  | 10.390622 | Decr1         | NM_026172    | Decr1         |
| 1429763_at   | 1.020679   | 8.291781  | 1.1419903  | 8.453802   | 1.3151276  | 8.657455  | 1.3828895  | 8.7299385 | Cnih4         | NM_030131    | Cnih4         |
| 1437624_x_at | 1.0332214  | 7.631577  | 0.8793356  | 7.3989134  | 0.8509776  | 7.3516207 | 0.6670471  | 7.000289  | Nudt16l1      | NM_025839    | Nudt16l1      |
| 1433952_at   | 1.001238   | 9.503557  | 0.87818754 | 9.314373   | 0.759735   | 9.10534   | 0.68285865 | 8.951431  | Tufm          | NM_172745    | ---           |
| 1424068_at   | 1.059006   | 7.8523054 | 0.87907267 | 7.583449   | 0.8353142  | 7.509986  | 0.70268106 | 7.2605367 | Tcta          | NM_133986    | Tcta          |
| 1451559_a_at | 1.0467628  | 8.942549  | 0.7359765  | 8.434347   | 0.58108217 | 8.093429  | 0.49757078 | 7.8695884 | Dhrs4         | NM_030686    | Dhrs4         |
| 1417067_s_at | 1.029974   | 6.756656  | 0.7709521  | 6.3387613  | 0.86306554 | 6.50159   | 0.6211915  | 6.027158  | Cabc1         | NM_023341    | Cabc1         |
| 1424311_at   | 1.0332272  | 8.464853  | 0.8933169  | 8.254941   | 0.8192423  | 8.130058  | 0.73315686 | 7.9698906 | 0710008K08Rik | NM_026995    | 0710008K08Rik |
| 1423856_at   | 1.0445741  | 8.720784  | 1.3524091  | 9.093401   | 1.5354269  | 9.276509  | 1.8212968  | 9.522835  | Popdc3        | NM_024886    | Popdc3        |
| 1451149_at   | 1.0220705  | 9.702923  | 0.8788869  | 9.485178   | 0.877498   | 9.482896  | 0.75071275 | 9.257761  | Pgm2          | NM_028132    | Pgm2          |
| 1424488_a_at | 1.0468253  | 9.520837  | 0.94672227 | 9.375829   | 0.94323665 | 9.370507  | 0.79661417 | 9.126769  | Ppa2          | NM_146141    | Ppa2          |
| 1438630_x_at | 0.99619836 | 8.747808  | 0.81615216 | 8.460213   | 0.67216986 | 8.180201  | 0.5847961  | 7.979308  | Mat2a         | NM_145569    | Mat2a         |
| 1457675_at   | 1.0096946  | 6.4028325 | 0.87284094 | 6.192704   | 0.8538819  | 6.161022  | 0.76960516 | 6.011104  | 2510002D24Rik | NM_110173    | 2510002D24Rik |
| 1452266_at   | 0.9626003  | 7.56897   | 0.7479122  | 7.2057123  | 0.5951518  | 6.876101  | 0.66093355 | 7.0273485 | Las11         | NM_152822    | Las11         |
| 1420542_at   | 1.0032017  | 6.8208632 | 0.7135676  | 6.329734   | 0.58683777 | 6.047285  | 0.49845725 | 5.811793  | ORF28         | NM_138664    | ORF28         |
| 1438386_x_at | 0.96990097 | 9.578264  | 0.8205226  | 9.33697    | 0.67908555 | 9.064021  | 0.5976083  | 8.879627  | Mat2a         | NM_145569    | Mat2a         |
| 1419382_a_at | 1.0358279  | 8.692529  | 0.7431143  | 8.2134     | 0.5640216  | 7.8155622 | 0.52020055 | 7.698884  | Dhrs4         | NM_030686    | Dhrs4         |
| 1449443_at   | 0.98519623 | 9.299218  | 0.7394849  | 8.885326   | 0.6471199  | 8.69284   | 0.5053652  | 8.336133  | Decr1         | NM_026172    | Decr1         |
| 1436421_s_at | 1.0131667  | 8.492214  | 0.8454978  | 8.232155   | 0.66686094 | 7.8887997 | 0.62815374 | 7.8025317 | Arpc5l        | NM_028809    | Arpc5l        |
| 1452896_at   | 1.0478066  | 7.7324204 | 0.9504439  | 7.591722   | 0.9362168  | 7.569963  | 0.777707   | 7.302347  | Gtl3          | NM_008187    | Gtl3          |
| 1449088_at   | 1.0511672  | 7.6197762 | 0.7418042  | 7.1168947  | 0.73449445 | 7.1026077 | 0.47703376 | 6.479947  | Fbp2          | NM_007994    | Fbp2          |
| 1423145_a_at | 1.0327368  | 12.16503  | 0.88077354 | 11.9354    | 0.81556696 | 11.824432 | 0.5887268  | 11.354227 | Tcap          | NM_011540    | Tcap          |
| 1418421_at   | 1.0524839  | 7.39232   | 0.75149256 | 6.906353   | 0.89188176 | 7.1534467 | 0.67004675 | 6.7408557 | Bcl6b         | NM_007528    | Bcl6b         |
| 1432073_at   | 0.9766858  | 8.991575  | 0.7889394  | 8.683595   | 0.65068316 | 8.405636  | 0.67917395 | 8.467461  | 1700113122Rik | NM_026865    | 1700113122Rik |
| 1424175_at   | 1.0322156  | 8.943458  | 0.85759413 | 8.676081   | 0.7895695  | 8.556851  | 0.58700156 | 8.12915   | Tef           | NM_017376    | Tef           |
| 1448151_at   | 1.002508   | 8.425917  | 1.0904192  | 8.573631   | 1.1105921  | 8.573631  | 1.353169   | 8.8586445 | Elav1         | NM_010485    | Elav1         |
| 1448491_at   | 1.0223298  | 12.659934 | 0.8557603  | 12.403352  | 0.85227466 | 12.397463 | 0.6514981  | 12.009906 | Ech1          | NM_016772    | Ech1          |
| 1415967_at   | 1.016197   | 12.010858 | 0.88453025 | 11.809564  | 0.8332947  | 11.72348  | 0.7607688  | 11.592111 | Ndufv1        | NM_133666    | Ndufv1        |
| 1428309_s_at | 1.0464073  | 8.53635   | 0.8343399  | 8.209614   | 0.725387   | 8.007729  | 0.60000366 | 7.7339487 | Pdrp1         | NM_178939    | Pdrp1         |
| 1452791_at   | 1.0327853  | 9.205562  | 0.8247888  | 8.881119   | 0.79236555 | 8.823259  | 0.6087792  | 8.443012  | Coq2          | NM_027978    | Coq2          |
| 1426836_s_at | 1.0013576  | 9.185869  | 0.88238025 | 9.003384   | 0.763951   | 8.7954645 | 0.78365713 | 8.832206  | Metap1        | NM_175224    | Metap1        |
| 1435823_x_at | 1.0033324  | 8.326882  | 0.71946573 | 7.847078   | 0.58650523 | 7.552299  | 0.52649397 | 7.3965726 | Egfl7         | NM_178444    | Egfl7         |
| 1419185_a_at | 0.95001346 | 6.8778734 | 0.7768249  | 6.587515   | 0.65305424 | 6.3371277 | 0.5096521  | 5.9794383 | Mlxip1        | NM_021455    | Wbscr14       |
| 1437398_a_at | 0.9654962  | 6.797332  | 0.8383191  | 6.59356    | 0.7175827  | 6.369206  | 0.6749123  | 6.280761  | Aldh9a1       | NM_019993    | Aldh9a1       |
| 1433763_at   | 1.0074311  | 8.877037  | 0.7710383  | 8.49123    | 0.82234466 | 8.58417   | 0.5720987  | 8.060692  | Entpd5        | NM_001026214 | Entpd5        |
| 1430976_a_at | 1.011339   | 7.124173  | 0.8601828  | 6.890622   | 0.66105723 | 6.510754  | 0.5924083  | 6.3525705 | Mrp19         | NM_030116    | Mrp19         |
| 1457306_at   | 1.006474   | 6.3532643 | 0.82345444 | 6.063715   | 0.73306787 | 5.8959727 | 0.59429175 | 5.593198  | Pole3         | NM_021498    | ---           |
| 1433590_at   | 1.021956   | 6.7212076 | 0.85769075 | 6.468404   | 0.71300936 | 6.201867  | 0.57631916 | 5.8948145 | Herc3         | NM_028705    | Herc3         |
| 1449141_at   | 0.96252733 | 9.622392  | 0.79284346 | 9.3426     | 0.6718144  | 9.103626  | 0.61614436 | 8.978832  | Fblim1        | NM_133754    | Fblim1        |
| 1417970_at   | 1.021158   | 8.040205  | 0.8251907  | 7.7327986  | 0.73264366 | 7.561183  | 0.64194065 | 7.370511  | Atp5s         | NM_026356    | Atp5s         |
| 1427768_s_at | 1.0022714  | 13.583291 | 0.95341074 | 13.511187  | 0.9370058  | 13.486147 | 0.89014846 | 13.412136 | MyI3          | NM_010859    | MyI3          |
| 1458469_at   | 0.9078606  | 5.9604597 | 1.3906696  | 6.575697   | 1.312688   | 6.492441  | 1.8008087  | 6.9485626 | Cblb          | NM_156257    | Cblb          |
| 1428266_at   | 0.99612534 | 13.486448 | 0.95022595 | 13.418392  | 0.9228235  | 13.376175 | 0.8809883  | 13.309243 | MyI3          | NM_010859    | MyI3          |
| 1419403_at   | 0.98499674 | 6.2713375 | 0.7846476  | 5.943263   | 0.7352862  | 5.8495245 | 0.5780284  | 5.502359  | BC017612      | NM_133214    | BC017612      |
| 1436277_at   | 0.9419637  | 7.9797025 | 0.6477261  | 7.4394145  | 0.62114686 | 7.378965  | 0.64960044 | 6.9754643 | D330010C22Rik | NM_033405    | D330010C22Rik |
| 1422578_at   | 0.99876505 | 12.022976 | 0.83758384 | 11.749064  | 0.74355274 | 11.597265 | 0.68543726 | 11.479856 | Cs            | NM_026444    | Cs            |
| 1454614_at   | 1.057061   | 8.956894  | 0.91496694 | 8.748628   | 0.90177566 | 8.727676  | 0.68162227 | 8.323881  | 1810013D10Rik | NM_485608    | 1810013D10Rik |
| 1424282_at   | 1.0391189  | 6.955516  | 0.8556984  | 6.6751122  | 0.835533   | 6.6409235 | 0.7053173  | 6.3964996 | Pet112l       | NM_144896    | Pet112l       |
| 1439846_at   | 1.0249728  | 7.049897  | 0.9249516  | 6.9017615  | 0.74405193 | 6.5877867 | 0.7370417  | 6.5741296 | Klf12         | NM_010636    | Klf12         |
| 1424319_at   | 0.9920776  | 6.8101273 | 0.80318063 | 6.505399   | 0.6210262  | 6.134329  | 0.6255713  | 6.144849  | Orao1         | NM_028184    | Orao1         |
| 1416647_at   | 1.0672607  | 9.508517  | 0.69536966 | 8.890456   | 0.5876573  | 8.647652  | 0.47866446 | 8.35169   | Bckdha        | NM_007533    | Bckdha        |
| 1437379_x_at | 1.0223731  | 8.316782  | 0.84032565 | 8.033879   | 0.670947   | 7.709131  | 0.6055422  | 7.561159  | Trap1         | NM_026508    | Trap1         |
| 1452341_at   | 1.0282714  | 11.434644 | 0.8534446  | 11.1657915 | 0.7932626  | 11.060293 | 0.6850257  | 10.848653 | Echs1         | NM_053119    | Echs1         |
| 1432195_s_at | 0.9654692  | 7.9559712 | 0.6617179  | 7.4109573  | 0.5324288  | 7.097333  | 0.46699634 | 6.9081526 | Ccnl2         | NM_188856    | Ccnl2         |
| 1435967_s_at | 1.0195996  | 11.245443 | 0.8427494  | 10.970617  | 0.71476394 | 10.73298  | 0.6209529  | 10.529997 | Hibadh        | NM_145567    | Hibadh        |
| 1437243_at   | 0.9904813  | 6.852703  | 0.7916229  | 6.5293865  | 0.6713692  | 6.29168   | 0.62731415 | 6.193762  | AI325464      | NM_178882    | AI325464      |
| 1424433_at   | 1.0522553  | 9.044     |            |            |            |           |            |           |               |              |               |

|              |            |            |            |           |            |            |            |           |               |              |               |
|--------------|------------|------------|------------|-----------|------------|------------|------------|-----------|---------------|--------------|---------------|
| 1427982_s_at | 1.0401447  | 6.9042444  | 0.8524796  | 6.6171975 | 0.8543519  | 6.6203623  | 0.57686776 | 6.053773  | Syne2         | XM_619002    | Syne2         |
| 1449619_s_at | 0.97899157 | 6.2413273  | 0.6965964  | 5.7503543 | 0.49975917 | 5.2712646  | 0.47472748 | 5.1971307 | Arhgap9       | NM_146011    | Arhgap9       |
| 1451229_at   | 1.0345919  | 6.709178   | 0.7638203  | 6.271421  | 0.71213603 | 6.1703405  | 0.51736104 | 5.709359  | Hdac11        | NM_144919    | Hdac11        |
| 1436275_at   | 0.99039716 | 9.975109   | 0.86261034 | 9.77581   | 0.6874446  | 9.448345   | 0.5694384  | 9.176641  | Kcnip2        | NM_030716    | Kcnip2        |
| 1434647_at   | 1.0629951  | 6.567316   | 0.8576217  | 6.2575946 | 0.76759726 | 6.0976033  | 0.5748745  | 5.6805    | AU040377      | NM_178748    | AU040377      |
| 1448487_at   | 0.98249155 | 7.9735107  | 0.7596338  | 7.6023693 | 0.66701543 | 7.4147854  | 0.69410694 | 7.4722233 | Lrrrip1       | NM_008515    | Lrrrip1       |
| 1452173_at   | 1.0061064  | 11.8101425 | 0.82625777 | 11.526025 | 0.7247113  | 11.336839  | 0.6188198  | 11.108951 | Hadha         | NM_178878    | Hadha         |
| 1424392_at   | 1.0219679  | 8.292253   | 0.823604   | 7.980925  | 0.59162307 | 7.5036526  | 0.51839453 | 7.3130245 | Adhfe1        | NM_175236    | Adhfe1        |
| 1454350_at   | 1.0151212  | 7.5036983  | 0.7884677  | 7.1391697 | 0.6562234  | 6.8743057  | 0.5080154  | 6.5049906 | Pdzk6         | NM_175515    | Pdzk6         |
| 1451354_at   | 1.0289483  | 7.6734915  | 0.84294796 | 7.385837  | 0.74733204 | 7.2121425  | 0.6486205  | 7.007768  | BC024806      | NM_172291    | BC024806      |
| 1452710_at   | 1.0351887  | 6.447007   | 0.89180094 | 6.2319074 | 0.86709064 | 6.191368   | 0.6226378  | 5.713579  | Rpusd4        | NM_028040    | Rpusd4        |
| 1449338_at   | 1.045726   | 8.842873   | 0.7995172  | 8.455669  | 0.62044436 | 8.089743   | 0.55272365 | 7.9229984 | D10Ert641e    | NM_025514    | D10Ert641e    |
| 1451271_a_at | 0.9949674  | 10.917426  | 0.75460607 | 10.5185   | 0.6030071  | 10.194952  | 0.5355851  | 10.023892 | Acat1         | NM_144784    | Acat1         |
| 1460194_at   | 1.0334319  | 10.888827  | 0.763885   | 10.452811 | 0.6309088  | 10.1768875 | 0.54615813 | 9.968774  | Phyh          | NM_010726    | Phyh          |
| 1428710_at   | 1.0144218  | 6.4523563  | 0.8472026  | 6.192477  | 0.7797264  | 6.072738   | 0.60674274 | 5.710855  | Rit1          | NM_009069    | Rit1          |
| 1451372_a_at | 1.0264326  | 10.1229515 | 0.80431116 | 9.771138  | 0.7504871  | 9.671211   | 0.48977515 | 9.055503  | Art1          | NM_009710    | Art1          |
| 1425742_a_at | 1.002442   | 10.7544006 | 0.8539628  | 10.523132 | 0.6394703  | 10.105837  | 0.54957145 | 9.887266  | Tsc22d1       | NM_009366    | Tsc22d1       |
| 1415690_at   | 1.040037   | 10.000105  | 0.9365521  | 9.848902  | 0.85654664 | 9.720073   | 0.7606921  | 9.548855  | Mrpl27        | NM_053161    | Mrpl27        |
| 1452344_at   | 0.981846   | 7.360192   | 0.83783835 | 7.131367  | 0.79193574 | 7.0500793  | 0.5691521  | 6.5735097 | Synj2         | NM_011523    | Synj2         |
| 1451606_at   | 1.0456923  | 7.762908   | 0.80895525 | 7.392581  | 0.8108134  | 7.3958917  | 0.5340121  | 6.7933936 | A530016L24Rik | NM_177039    | A530016L24Rik |
| 1421873_s_at | 1.0206337  | 7.2221723  | 0.7739653  | 6.8230476 | 0.69550574 | 6.6688414  | 0.646191   | 6.56274   | Rab24         | NM_009000    | Rab24         |
| 1430522_a_at | 1.047986   | 8.721231   | 0.8981466  | 8.498713  | 0.807169   | 8.344633   | 0.58177054 | 7.872212  | Vamp5         | NM_016872    | Vamp5         |
| 1425788_a_at | 1.0379825  | 6.6742535  | 0.71721864 | 6.140957  | 0.6429235  | 5.9831905  | 0.54243565 | 5.7379956 | Echdc2        | NM_026728    | Echdc2        |
| 1416373_at   | 1.0020345  | 9.336077   | 0.79960144 | 9.010497  | 0.6824911  | 7.82027    | 0.62412125 | 8.653043  | Nfs1          | NM_010911    | Nfs1          |
| 1417383_at   | 1.0158579  | 8.124636   | 0.8128622  | 7.8030195 | 0.80759907 | 7.7936482  | 0.5611493  | 7.2683935 | Entpd5        | NM_001026214 | Entpd5        |
| 1424183_at   | 1.0042872  | 11.275981  | 0.73439413 | 10.824436 | 0.58901715 | 10.506191  | 0.5323278  | 10.360197 | Acat1         | NM_144784    | Acat1         |
| 1437496_at   | 1.0667306  | 7.2555676  | 0.7101449  | 6.6685567 | 0.5374854  | 6.2666693  | 0.46534744 | 6.058752  | R30129D05Rik  | XM_488540    | 9330129D05Rik |
| 1448478_at   | 0.9975185  | 6.9933624  | 0.79581493 | 6.667452  | 0.6147277  | 6.2949657  | 0.5497284  | 6.133738  | Trfp          | NM_020048    | Trfp          |
| 1418862_at   | 1.0458608  | 8.279272   | 0.7560697  | 7.810289  | 0.76956797 | 7.8367023  | 0.61771446 | 7.5195932 | Echdc3        | NM_024208    | Echdc3        |
| 1428614_at   | 1.0070662  | 6.265424   | 0.66448855 | 5.6655817 | 0.57648915 | 4.4666304  | 0.46644625 | 5.1550484 | Ldhc          | NM_027570    | Ldhc          |
| 1433966_x_at | 1.0029975  | 3.4720287  | 12.978383  | 7.1657495 | 1.9387491  | 4.422837   | 4.1949224  | 5.5363545 | Asns          | NM_012055    | Asns          |
| 1423878_at   | 1.0575403  | 7.073758   | 0.7448097  | 6.56799   | 0.83452815 | 6.7320786  | 0.648546   | 6.3683267 | Gypc          | NM_027863    | Gypc          |
| 1435004_at   | 1.0165545  | 8.6225195  | 0.78026146 | 8.240861  | 0.69686174 | 8.077776   | 0.60530174 | 7.874558  | Pank4         | NM_172990    | Pank4         |
| 1424790_at   | 0.95850605 | 8.425718   | 0.7007787  | 7.973889  | 0.7303096  | 8.033438   | 0.53269464 | 7.5782394 | 2900084M01Rik | NM_001007570 | 2900084M01Rik |
| 1416381_a_at | 1.0028987  | 10.397112  | 0.8452863  | 10.150048 | 0.94362795 | 10.309226  | 0.788478   | 10.050078 | Prdx5         | NM_012021    | Prdx5         |
| 1417841_at   | 1.0303031  | 9.731949   | 0.9002384  | 9.537258  | 0.8331164  | 9.425469   | 0.6301603  | 9.02267   | Pxmp2         | NM_008993    | Pxmp2         |
| 1426285_at   | 0.9794346  | 8.392409   | 0.7795909  | 8.063177  | 0.73869646 | 7.9854417  | 0.6370346  | 7.7718315 | Lama2         | NM_008481    | Lama2         |
| 1435874_at   | 1.0051117  | 7.7002673  | 0.69722384 | 7.1571865 | 0.50873584 | 6.7024813  | 0.40490195 | 6.373137  | Prkab2        | NM_182997    | Prkab2        |
| 1426614_at   | 0.96547    | 7.502004   | 0.8167675  | 7.2606983 | 0.7662689  | 7.168623   | 0.6353639  | 6.8983555 | Prkcbp1       | NM_027230    | Prkcbp1       |
| 1448717_at   | 1.036107   | 7.5436125  | 0.8935967  | 7.3301353 | 0.7527522  | 7.0826864  | 0.6074127  | 6.7731886 | Gcdh          | NM_002793    | Gcdh          |
| 1429024_at   | 0.987968   | 9.2021265  | 0.82361543 | 8.939634  | 0.7139543  | 8.733495   | 0.61304116 | 8.513646  | 1110018J23Rik | XM_140742    | 1110018J23Rik |
| 1448900_at   | 1.0003868  | 9.470089   | 0.7512903  | 9.056974  | 0.6554645  | 8.860122   | 0.49726683 | 8.461623  | D16H22S680E   | NM_138583    | D16H22S680E   |
| 1455991_at   | 1.0493279  | 8.047577   | 0.8834359  | 7.7993083 | 0.7509479  | 7.5648956  | 0.61637366 | 7.2799883 | Ccbl2         | NM_173763    | Ccbl2         |
| 1451095_at   | 0.97704774 | 5.454471   | 7.3928466  | 8.3741    | 1.6911899  | 6.246009   | 3.1197186  | 7.129386  | Asns          | NM_012055    | Asns          |
| 1428332_at   | 1.0380442  | 8.032222   | 0.82682663 | 7.7040105 | 0.7002107  | 7.4642153  | 0.48947933 | 6.947674  | 1500004A08Rik | NM_178149    | 1500004A08Rik |
| 1455376_at   | 1.007562   | 7.688667   | 0.80541515 | 7.3656025 | 0.74643755 | 7.255892   | 0.5597143  | 6.840561  | 1300010F03Rik | XM_127737    | 1300010F03Rik |
| 1424184_at   | 0.9926638  | 12.0043335 | 0.7917908  | 11.678149 | 0.72000045 | 11.541027  | 0.6346664  | 11.359027 | Acadvl        | NM_017366    | Acadvl        |
| 1435875_at   | 0.98037696 | 7.1606436  | 0.7818122  | 6.83413   | 0.56921124 | 6.3762717  | 0.5302256  | 6.2739134 | Prkab2        | NM_182997    | Prkab2        |
| 1417384_at   | 1.0356942  | 9.653223   | 0.8260057  | 9.326847  | 0.8916931  | 9.4372425  | 0.56367517 | 8.77556   | Entpd5        | NM_001026214 | Entpd5        |
| 1428613_at   | 1.0261235  | 7.214431   | 0.7029594  | 6.66874   | 0.56653893 | 6.3574734  | 0.5039493  | 6.188577  | Ldhc          | NM_027570    | Ldhc          |
| 1460184_at   | 1.0128093  | 10.820987  | 0.74926996 | 10.386183 | 0.6775471  | 10.241018  | 0.52525556 | 9.873716  | Hadhsc        | NM_008212    | Hadhsc        |
| 1433767_at   | 0.9972456  | 7.769755   | 0.889949   | 7.605529  | 0.7892844  | 7.432351   | 0.59399015 | 7.022245  | 1110018G07Rik | NM_178065    | 1110018G07Rik |
| 1426522_at   | 1.0084078  | 12.937693  | 0.7901878  | 12.585881 | 0.6651585  | 12.337384  | 0.5555791  | 12.077679 | Hadhb         | NM_145558    | Hadhb         |
| 1450707_at   | 1.0477601  | 8.6810255  | 0.814541   | 8.317776  | 0.5439607  | 7.7352905  | 0.4297348  | 7.395235  | Doc2g         | NM_021791    | Doc2g         |
| 1423218_a_at | 1.0351307  | 7.6689377  | 0.79696864 | 7.2917194 | 0.7348114  | 7.174571   | 0.6349659  | 6.963876  | Mrpl49        | NM_026246    | Mrpl49        |
| 1424393_s_at | 1.0219606  | 8.842228   | 0.8211259  | 8.526564  | 0.5582345  | 7.9698315  | 0.43398657 | 7.606611  | Adhfe1        | NM_175236    | Adhfe1        |
| 1416452_at   | 1.0170137  | 10.419093  | 0.8503704  | 10.160917 | 0.62981296 | 9.72775    | 0.56192297 | 9.563198  | Oat           | NM_016978    | Oat           |
| 1450048_a_at | 1.028077   | 12.221268  | 0.79641175 | 11.852905 | 0.6723843  | 11.608678  | 0.6006435  | 11.4459   | ldh2          | NM_173011    | ldh2          |
| 1448722_s_at | 1.0053401  | 6.4735785  | 0.8436313  | 6.220579  | 0.7908318  | 6.1273375  | 0.6413586  | 5.8250976 | Ppcs          | NM_026494    | Ppcs          |
| 1424182_at   | 0.99677485 | 9.799859   | 0.676084   | 9.239794  | 0.4761937  | 8.734139   | 0.42538664 | 8.571365  | Acat1         | NM_144784    | Acat1         |
| 1450969_at   | 1.0389049  | 8.626302   | 0.80125636 | 8.2515745 | 0.6425593  | 7.93314    | 0.55113554 | 7.7117176 | Pccb          | NM_025835    | Pccb          |
| 1416170_at   | 1.0298996  | 9.227974   | 0.790621   | 8.846529  | 0.6320629  | 8.52361    | 0.57476974 | 8.386526  | Trap1         | NM_026508    | Trap1         |
| 1418068_at   | 1.0097227  | 8.180971   | 0.7833943  | 7.814822  | 0.7120691  | 7.677101   | 0.54194987 | 7.283243  | Ndufa10       | NM_024197    | Ndufa10       |
| 1421087_at   | 1.0345392  | 6.4548936  | 0.7318047  | 5.9554358 | 0.61565423 | 5.706097   | 0.45664737 | 5.2750573 | Per3          | NM_011067    | Per3          |
| 1419994_s_at | 1.0390772  | 8.565023   | 0.71826243 | 8.032305  | 0.46392414 | 7.4016824  | 0.39707795 | 7.1772156 | D10Ert641e    | NM_025514    | D10Ert641e    |
| 1418238_at   | 1.0535713  | 10.084831  | 0.74714524 | 9.5890045 | 0.58425087 | 9.234204   | 0.4735401  | 8.931103  | lvd           | NM_019826    | lvd           |
| 1427213_at   | 1.0149869  | 7.3570447  | 0.83717525 | 7.079185  | 0.7455997  | 6.9120564  | 0.46778747 | 6.2395086 | Pfkfb1        | NM_008824    | Pfkfb1        |
| 1424662_at   | 1.0065312  | 9.184478   | 0.7612202  | 8.781472  | 0.6108492  | 8.463974   | 0.5873762  | 8.407443  | Pmpca         | NM_173180    | Pmpca         |
| 1449001_at   | 1.0089755  | 9.314794   | 0.6755453  | 8.736027  | 0.41818917 | 8.04413    | 0.30977437 | 7.611192  | lvd           | NM_019826    | lvd           |
| 1433855_at   | 1.0391849  | 6.2171764  | 0.76757056 | 5.7800956 | 0.48362422 | 5.1136823  | 0.5069663  | 5.1816854 | Abat          | NM_172961    | Abat          |
| 1449484_at   | 1.0273322  | 6.4994326  | 0.7333266  | 6.0130577 | 0.8635455  | 6.2488737  | 0.35881957 | 4.98186   | Stc2          | NM_011491    | Stc2          |
| 1418716_at   | 1.0312318  | 6.441259   | 0.75685745 | 5.9949837 | 0.5667056  | 5.5775614  | 0.4163404  | 5.1327257 | Mrps25        | NM_025578    | Mrps25        |
| 1428675_at   | 1.0263026  | 7.379576   | 0.89213955 | 7.177461  | 0.8291691  | 7.0718584  | 0.6361102  | 6.6894684 | 1110049F12Rik | NM_025411    | 1110049F12Rik |
