# Supplementary material
Source: PubMed Central journal article supplement (PMC2536824)
Supplement: 90225.2008_4.pdf [file 90225.2008_4.pdf]

## Gene Changes Unique to Arg hearts (other transgenics shown for comparison)

| Geno ()*S    | NTG        |            | AC5        |            | GLY        |            | ARG       |            | Common        | Genbank      | Gene Symbol     |
|--------------|------------|------------|------------|------------|------------|------------|-----------|------------|---------------|--------------|-----------------|
|              | Systematic | Normalized | Raw        | Normalized | Raw        | Normalized | Raw       | Normalized |               |              |                 |
| 1449254_at   | 0.9769484  | 3.1026528  | 1.0646751  | 3.2267118  | 2.0295556  | 4.157462   | 6.8961163 | 5.922083   | Spp1          | NM_009263    | Spp1            |
| 1448898_at   | 0.97773343 | 5.3012934  | 1.1814247  | 5.5743074  | 1.1302786  | 5.5104585  | 3.8593776 | 7.2821484  | Ccl9          | NM_011338    | Ccl9            |
| 1453898_at   | 0.920317   | 7.3510313  | 0.9976717  | 7.467466   | 1.60474    | 8.153168   | 3.4534342 | 9.258861   | Htgb1bp3      | XM_125745    | Htgb1bp3        |
| 1417936_at   | 1.0086284  | 6.962519   | 1.1096064  | 7.1001725  | 1.0620223  | 7.0369387  | 3.1429539 | 8.602245   | Ccl9          | NM_011338    | Ccl9            |
| 1450922_a_at | 0.999443   | 5.025845   | 1.0559707  | 5.1052194  | 1.5213221  | 5.631975   | 3.1012402 | 6.6594944  | C3ar1         | NM_009779    | C3ar1           |
| 1419483_at   | 0.9459567  | 5.4497313  | 1.1082346  | 5.6781483  | 1.403021   | 6.018422   | 2.915454  | 7.073606   | C3ar1         | NM_009779    | C3ar1           |
| 1450922_a_at | 0.9859765  | 4.972211   | 1.1860782  | 5.2387853  | 1.3809747  | 5.4582725  | 2.789142  | 6.4724073  | Tgfb2         | NM_009367    | Tgfb2           |
| 1452754_at   | 1.0333568  | 6.586193   | 1.4223772  | 7.0471587  | 1.3715686  | 6.9946814  | 2.7267423 | 7.9860334  | 5730592L21Rik | NM_029720    | 5730592L21Rik   |
| 145328_s_at  | 1.0393926  | 8.522133   | 1.1030563  | 8.607899   | 1.2402216  | 7.767699   | 2.71783   | 9.908848   | E430024C06Rik | AU018141     | E430024C06Rik   |
| 1420249_s_at | 1.0077621  | 5.0592694  | 1.0147762  | 5.0692754  | 1.0691954  | 5.14464    | 2.6730342 | 6.4665923  | Ccl6          | NM_009139    | Ccl6            |
| 1451941_a_at | 1.0075817  | 5.4493213  | 1.0450693  | 5.502023   | 1.2300122  | 5.7370973  | 2.6325698 | 6.8348966  | Fcgr2b        | NM_010187    | Fcgr2b          |
| 1417266_at   | 0.9898705  | 7.024494   | 1.0751493  | 7.143719   | 1.0636001  | 7.128138   | 2.572239  | 8.402206   | Ccl6          | NM_009139    | Ccl6            |
| 1448591_at   | 0.92824274 | 7.970716   | 0.92984486 | 7.973204   | 1.0038553  | 8.083693   | 2.527846  | 9.41605    | Ctss          | NM_021281    | Ctss            |
| 1418949_at   | 0.9863956  | 6.02902    | 1.4569472  | 6.59173    | 1.2068155  | 6.319987   | 2.4749076 | 7.3561563  | Gdf15         | NM_011819    | Gdf15           |
| 1449533_at   | 0.9852538  | 5.7533803  | 1.0643204  | 5.8647456  | 1.2935178  | 6.146113   | 2.4636981 | 7.0756383  | 1810057C19Rik | NM_026433    | 1810057C19Rik   |
| 1421811_at   | 0.8369934  | 5.718491   | 1.1278424  | 6.1487684  | 0.99539316 | 5.9685416  | 2.4183414 | 7.2492213  | Thbs1         | NM_009139    | Thbs1           |
| 1452418_at   | 1.0295793  | 9.220183   | 1.0192317  | 9.20561    | 1.0818889  | 9.291681   | 2.4028492 | 10.442875  | 1200016E24Rik | BF719154     | 1200016E24Rik   |
| 1416576_at   | 0.9808182  | 5.458763   | 1.0092779  | 5.500029   | 1.2016542  | 5.751728   | 2.3770757 | 6.7358937  | Socs3         | NM_007707    | Socs3           |
| 1427932_s_at | 0.9667932  | 9.26346    | 0.97391814 | 9.274054   | 1.0458565  | 9.376865   | 2.331144  | 10.533219  | 1200003110Rik | XM_488801    | 1200003110Rik   |
| 1435137_s_at | 0.98198694 | 8.726084   | 0.9765061  | 8.71801    | 1.1533165  | 8.958097   | 2.3282485 | 9.971554   | A130040M12Rik | BB119177     | A130040M12Rik   |
| 1446894_at   | 1.0425838  | 5.497526   | 1.031528   | 5.482146   | 1.4807097  | 6.0036516  | 2.2796383 | 6.626168   | Arnt2         | NM_007488    | Arnt2           |
| 1452349_x_at | 1.0134382  | 6.704304   | 1.1681473  | 6.909268   | 0.89664334 | 6.527652   | 2.2622511 | 7.8628044  | Ifi205        | NM_172648    | Ifi205 /// Mnda |
| 1456062_at   | 0.9848206  | 10.117434  | 0.6489405  | 10.159336  | 1.0129839  | 10.158112  | 2.2561452 | 11.31336   | Nppa          | NM_009139    | Nppa            |
| 1457296_at   | 0.925239   | 5.4264607  | 0.9728368  | 5.397353   | 1.2403706  | 5.7480364  | 2.2340996 | 6.596958   | Cilp          | NM_173385    | Cilp            |
| 1438009_at   | 0.98690385 | 7.5057173  | 1.0584855  | 7.606737   | 1.3712833  | 7.9802623  | 2.2331676 | 8.683826   | Hist1h2ad     | NM_178188    | Hist1h2ad       |
| 1425477_x_at | 0.94108254 | 7.106797   | 0.78117883 | 6.838129   | 1.2520692  | 7.5187187  | 2.2106342 | 8.338864   | H2-Ab1        | NM_010379    | H2-Ab1          |
| 1437110_at   | 0.9813911  | 6.311035   | 1.1128433  | 6.492386   | 1.1302261  | 6.5148005  | 2.194065  | 7.471742   | 2810474O19Rik | NM_026054    | 2810474O19Rik   |
| 1447930_at   | 0.9954954  | 6.364618   | 1.0337654  | 6.4190407  | 1.3289065  | 6.781371   | 2.1916637 | 7.503158   | Bac21a        | XM_484412    | Bac21a          |
| 1419627_s_at | 1.049074   | 5.3349223  | 1.0754638  | 5.3707647  | 1.2151976  | 5.5469966  | 2.176932  | 6.388102   | Clec4n        | NM_020001    | Clec4n          |
| 1416953_at   | 0.9912208  | 9.28508    | 0.9922688  | 9.286604   | 0.9451149  | 9.216363   | 2.1698303 | 10.415384  | Ctgf          | NM_010217    | Ctgf            |
| 1457666_s_at | 0.909076   | 5.082358   | 0.80870473 | 4.9135704  | 0.858402   | 4.999611   | 2.1649268 | 6.3342037  | Ifi202b       | NM_008327    | Ifi202b         |
| 1448617_at   | 0.9804106  | 6.4293127  | 0.98981196 | 6.443081   | 1.1516806  | 6.6615953  | 2.1628766 | 7.5708055  | Cdc5          | NM_007651    | Cdc5            |
| 1456642_x_at | 0.97894776 | 8.62089    | 1.0746256  | 8.755421   | 1.2966962  | 9.026427   | 2.1461601 | 9.753344   | S100a10       | NM_009112    | S100a10         |
| 1431057_a_at | 0.9268153  | 5.604869   | 0.92141503 | 5.5964384  | 1.225061   | 6.0073686  | 2.0879724 | 6.7766175  | Prss23        | NM_029614    | Prss23          |
| 1448620_at   | 1.0112853  | 7.02386    | 1.0866877  | 7.127607   | 1.1639253  | 7.2266684  | 2.0848894 | 8.067641   | Fcgr3         | NM_010188    | Fcgr3           |
| 1423954_at   | 1.0327811  | 8.426225   | 1.0388888  | 8.4347315  | 1.3026786  | 8.761171   | 2.0820365 | 9.437685   | C3            | NM_009778    | C3              |
| 1427005_at   | 0.97525877 | 7.4143047  | 0.9128496  | 7.3188972  | 1.2231311  | 7.7410274  | 2.081292  | 8.507927   | Plk2          | NM_152804    | Plk2            |
| 1418826_at   | 0.98522484 | 6.1126266  | 1.1114975  | 6.2866063  | 0.9139462  | 6.400283   | 2.0763535 | 7.1881537  | Ms4a6b        | NM_027209    | Ms4a6b          |
| 1439902_at   | 1.006977   | 5.150398   | 1.0527523  | 5.2145333  | 1.1312598  | 5.3182974  | 2.0728328 | 6.191971   | C5r1          | NM_007577    | C5r1            |
| 1424065_at   | 1.0253043  | 5.266078   | 1.2976477  | 5.6059246  | 1.2982875  | 5.6066365  | 2.0726466 | 6.2815003  | Edem1         | NM_138677    | Edem1           |
| 1451721_a_at | 0.9372732  | 6.9203634  | 0.8581106  | 6.7930574  | 1.240073   | 7.324247   | 2.0690444 | 8.062787   | H2-Ab1        | NM_010379    | H2-Ab1          |
| 1428637_at   | 0.94783103 | 7.6718283  | 0.9926987  | 7.738555   | 1.0758405  | 7.854591   | 2.0361562 | 8.774976   | Dyrk2         | NM_001014390 | Dyrk2           |
| 1419482_at   | 0.97686225 | 5.789915   | 0.9693769  | 5.788117   | 1.5485114  | 6.031395   | 2.0215094 | 6.839121   | C3ar1         | NM_009779    | C3ar1           |
| 1458455_at   | 1.0041808  | 7.2629232  | 1.031305   | 7.3013754  | 0.80762804 | 6.948667   | 2.0118678 | 8.265439   | C130068O12Rik | NM_175456    | C130068O12Rik   |
| 1452431_s_at | 0.92618597 | 8.795559   | 0.75650364 | 1.864872   | 9.152883   | 2.0067227  | 9.152883  | 9.911027   | H2-Aa         | NM_010378    | H2-Aa           |
| 1435290_x_at | 0.9164049  | 7.9237747  | 0.849619   | 7.814606   | 1.2701182  | 8.39468    | 2.005937  | 9.053995   | H2-Aa         | NM_010378    | H2-Aa           |
| 1448395_at   | 0.9962445  | 5.8962035  | 1.0022856  | 5.9049253  | 1.3058956  | 6.2866707  | 2.0012474 | 6.902531   | Sfrp1         | NM_013834    | Sfrp1           |
| 1418572_x_at | 1.0607039  | 8.461862   | 1.1900516  | 8.627864   | 1.3315604  | 8.789957   | 1.9884851 | 9.368509   | Tnfrsf12a     | NM_013749    | Tnfrsf12a       |
| 1435749_at   | 0.9401018  | 7.091112   | 0.96982443 | 7.1360183  | 1.0317601  | 7.2253304  | 1.9850594 | 8.169405   | Gda           | NM_010266    | Gda             |
| 1437675_at   | 1.0521753  | 7.4213834  | 1.3662176  | 7.7981954  | 1.4775951  | 7.911259   | 1.9828216 | 8.335563   | Slc8a1        | NM_011406    | Slc8a1          |
| 1436530_at   | 1.068434   | 7.9938517  | 1.1922468  | 8.152037   | 1.3505949  | 8.331949   | 1.9793137 | 8.883354   | ---           | CB319028     | ---             |
| 1437671_x_at | 0.94927543 | 5.912217   | 0.89738286 | 5.831114   | 1.2214317  | 6.275892   | 1.9550229 | 6.954504   | Prss23        | NM_029614    | Prss23          |
| 1449164_at   | 1.0035781  | 6.6112666  | 1.0735223  | 6.7084656  | 1.2200048  | 6.8930006  | 1.9541361 | 7.572644   | Cd68          | NM_009853    | Cd68            |
| 1449082_at   | 0.90617007 | 6.136133   | 0.8472885  | 6.0392046  | 1.1653323  | 6.499021   | 1.9529216 | 7.2439137  | Mfap5         | NM_015776    | Mfap5           |
| 1417268_at   | 1.0272535  | 6.5568523  | 1.0336169  | 6.565762   | 1.0355226  | 6.568419   | 1.9526819 | 7.4835167  | Cd14          | NM_009841    | Cd14            |
| 1417063_at   | 1.0080447  | 8.203682   | 1.0198642  | 8.220499   | 1.1578761  | 8.403603   | 1.9473172 | 9.15361    | C1qb          | NM_009777    | C1qb            |
| 1418571_at   | 1.0550771  | 9.072567   | 1.1889796  | 9.244942   | 1.3171135  | 9.392598   | 1.9308299 | 9.944439   | Tnfrsf12a     | NM_013749    | Tnfrsf12a       |
| 1437726_x_at | 0.99527746 | 7.828138   | 1.111348   | 7.9870005  | 1.3336147  | 8.250309   | 1.908074  | 8.767084   | C1qb          | NM_009777    | C1qb            |
| 1455271_at   | 0.9589457  | 5.9884396  | 0.9072372  | 5.90847    | 1.2014142  | 6.313652   | 1.9007537 | 6.9754906  | 1810020C19Rik | XM_130317    | 1810020C19Rik   |
| 1425603_at   | 1.0237749  | 5.4839125  | 0.9684255  | 5.403727   | 1.2564566  | 5.7793746  | 1.8896403 | 6.368126   | 0610011104Rik | NM_025326    | 0610011104Rik   |
| 1436918_at   | 0.9156636  | 7.2057366  | 0.971709   | 7.2914433  | 1.0814159  | 7.445769   | 1.8890586 | 8.250514   | 1810038L18Rik | NM_001014390 | 4932442E05Rik   |
| 1423606_at   | 0.8944572  | 8.325781   | 0.72044325 | 8.013653   | 0.8351894  | 8.2268715  | 1.8863326 | 9.402281   | Postn         | NM_015784    | Postn           |
| 1449106_at   | 1.0359113  | 10.934046  | 1.1068667  | 11.029627  | 1.434218   | 11.40341   | 1.884539  | 11.797357  | Gpx3          | NM_008161    | Gpx3            |
| 1452649_at   | 1.0009953  | 9.632317   | 0.92207205 | 9.513834   | 1.1366593  | 8.915681   | 1.8775139 | 10.539705  | Rtn4          | NM_024226    | Rtn4            |
| 1453677_a_at | 1.047503   | 6.335963   | 1.0208046  | 6.2987146  | 1.2876457  | 6.633744   | 1.8753537 | 7.176171   | Derl3         | NM_024440    | Derl3           |
| 1450791_at   | 0.99578357 | 11.729757  | 1.299474   | 12.11378   | 1.1900027  | 11.986817  | 1.8737668 | 12.641794  | Nppb          | NM_008726    | Nppb            |
| 1456320_at   | 0.967557   | 5.8071246  | 1.0633203  | 5.943282   | 1.1290268  | 6.0297856  | 1.8717645 | 6.759105   | BC049806      | NM_172513    | BC049806        |
| 1438948_x_at | 1.03023    | 7.284863   | 0.98592913 | 7.2214518  | 1.4097861  | 7.7373734  | 1.8661809 | 8.141985   | Bzrp          | NM_009775    | Bzrp            |
| 1448550_at   | 0.973316   | 5.301427   | 0.9582066  | 5.2788553  | 1.1574453  | 5.5513906  | 1.8623543 | 6.237574   | Lbp           | NM_008489    | Lbp             |
| 1418296_at   | 0.9747138  | 7.5140004  | 1.0323849  | 7.5969305  | 1.268298   | 7.893843   | 1.8620214 | 8.446408   | Fxyd5         | NM_008761    | Fxyd5           |
| 1418162_at   | 0.9298286  | 5.412919   | 1.0241885  | 5.5523634  | 0.78679854 | 5.171948   | 1.8559382 | 6.4100304  | Tlr4          | NM_021297    | Tlr4            |
| 1423669_at   | 0.88968784 | 8.218254   | 0.80531794 | 8.074513   | 1.1428169  | 8.579476   | 1.8551943 | 9.278453   | Col1a1        | NM_007742    | Col1a1          |
| 1425519_a_at | 0.93355596 | 8.908572   | 0.7850274  | 8.65858    | 1.2513238  | 9.331219   | 1.8446629 | 9.891122   | li            | NM_010545    | li              |
| 1426875_s_at | 1.0198778  | 6.256011   | 1.0950409  | 6.3585997  | 1.2463347  | 6.545306   | 1.8347409 | 7.103191   | Srxn1         | NM_029688    | Srxn1           |

|              |            |           |            |           |            |            |           |            |               |              |               |
|--------------|------------|-----------|------------|-----------|------------|------------|-----------|------------|---------------|--------------|---------------|
| 1451680_at   | 1.0256754  | 6.564843  | 1.1262681  | 6.6998186 | 1.2096651  | 6.802876   | 1.74376   | 7.33047    | Srxn1         | NM_029688    | Srxn1         |
| 1448433_a_at | 0.9995553  | 7.85981   | 0.9846431  | 7.8375473 | 1.339197   | 8.281242   | 1.7424121 | 6.66096    | Pcolce        | NM_008788    | Pcolce        |
| 1423686_a_at | 1.0162538  | 6.830703  | 1.029177   | 6.848933  | 1.2136152  | 7.0867534  | 1.7389281 | 7.6056404  | 1110020C13Rik | NM_025385    | 1110020C13Rik |
| 1421624_a_at | 1.0025996  | 6.6936293 | 1.1788849  | 6.927307  | 1.2338502  | 6.993051   | 1.7386836 | 7.4878793  | Enah          | NM_010135    | Enah          |
| 1453622_s_at | 1.0209159  | 5.634925  | 1.2718214  | 5.9519567 | 1.3292583  | 6.015682   | 1.7385108 | 6.4029126  | Mlit3         | NM_027326    | Mlit3         |
| 1416695_at   | 1.0017216  | 7.8673067 | 0.89777344 | 7.7092485 | 1.133406   | 8.04549    | 1.7327949 | 8.657927   | Bzrp          | NM_009775    | Bzrp          |
| 144828_at    | 1.0042869  | 6.290047  | 1.1670123  | 6.4448104 | 1.196564   | 6.480888   | 1.7307192 | 7.013362   | Hmox1         | NM_010442    | Hmox1         |
| 1438420_at   | 0.9623624  | 7.4843683 | 1.2117631  | 7.8168235 | 1.0748104  | 7.643798   | 1.727209  | 8.328158   | Rnpc2         | NM_133242    | Rnpc2         |
| 1424265_at   | 1.0042869  | 5.9788203 | 1.0233312  | 6.005922  | 1.2477186  | 6.2919416  | 1.7267983 | 6.7607484  | Npl           | NM_028749    | Npl           |
| 1450792_at   | 1.0375941  | 7.5604405 | 1.0511353  | 7.5791464 | 1.1726139  | 7.736926   | 1.7261488 | 8.294755   | Tyrobp        | NM_011662    | Tyrobp        |
| 1448160_at   | 0.9829086  | 6.0424414 | 1.0252608  | 6.1033034 | 1.1336151  | 6.2482433  | 1.7242373 | 6.8532705  | Lcp1          | NM_008879    | Lcp1          |
| 1416594_at   | 1.0275314  | 6.339551  | 0.97289485 | 6.260724  | 1.235183   | 6.6050935  | 1.7231092 | 7.085383   | Sfrp1         | NM_013834    | Sfrp1         |
| 1418431_at   | 0.95016634 | 6.9299264 | 0.94131577 | 6.9164248 | 0.9752525  | 6.967522   | 1.7210131 | 7.7869325  | Kif5b         | NM_008448    | Kif5b         |
| 1448604_at   | 1.0018789  | 7.518238  | 1.1657842  | 7.7368307 | 1.189177   | 7.7654934  | 1.720815  | 8.298622   | Uck2          | NM_030724    | Uck2          |
| 1417381_at   | 1.006221   | 8.993773  | 0.98125994 | 8.957533  | 1.0783659  | 9.093673   | 1.7198277 | 9.76709    | C1qa          | NM_007572    | C1qa          |
| 1452244_at   | 0.9657234  | 6.4409404 | 0.8598274  | 6.273377  | 1.0525205  | 6.5651064  | 1.7197253 | 7.2734365  | 6330406115Rik | NM_027519    | 6330406115Rik |
| 1422587_at   | 0.9981957  | 5.759612  | 0.9229584  | 5.646555  | 1.3022645  | 6.14324    | 1.7191787 | 6.543937   | Tmem45a       | NM_019631    | Tmem45a       |
| 1415828_a_at | 1.0341486  | 7.7273407 | 1.1531345  | 7.8844585 | 1.0655203  | 7.7704315  | 1.7183869 | 8.459952   | D3Ucla1       | NM_030685    | D3Ucla1       |
| 1415983_at   | 0.95010275 | 7.3691072 | 0.9251969  | 7.3307843 | 1.0905302  | 7.5679817  | 1.7155294 | 8.221606   | Lcp1          | NM_008879    | Lcp1          |
| 1439740_s_at | 0.90063095 | 6.9779644 | 1.0783284  | 7.237753  | 1.0570184  | 7.2089567  | 1.7150209 | 7.907182   | AI481316      | NM_030724    | AI481316      |
| 1449372_at   | 1.0240831  | 6.906254  | 1.2326481  | 7.1736817 | 1.0623928  | 5.959238   | 1.713468  | 7.64884    | Dnajc3        | NM_008929    | Dnajc3        |
| 1418465_at   | 1.00030373 | 5.3347383 | 0.9810545  | 5.3027678 | 1.0766664  | 6.436934   | 1.7083951 | 6.1030045  | Ncf4          | NM_008677    | Ncf4          |
| 1429196_at   | 1.0216318  | 7.3008156 | 0.8924766  | 7.1058264 | 1.3518373  | 7.7048616  | 1.7061644 | 8.040697   | Rabgap1l      | NM_013862    | Rabgap1l      |
| 1417869_s_at | 0.99441516 | 6.376508  | 1.1000602  | 6.5221705 | 1.2263714  | 6.6789837  | 1.7057563 | 7.1549997  | Ctsc          | NM_022325    | Ctsc          |
| 1434153_at   | 1.0107511  | 7.0592613 | 1.0161365  | 7.066928  | 1.0889323  | 7.166748   | 1.7005124 | 7.809803   | Shb           | XM_131399    | Shb           |
| 1428136_at   | 0.97414225 | 5.937649  | 0.9579582  | 5.913479  | 1.1466124  | 6.1728225  | 1.7003645 | 6.741288   | Sfrp1         | NM_013834    | Sfrp1         |
| 1437868_at   | 0.95903134 | 7.234595  | 0.9674596  | 7.247218  | 1.0946814  | 7.4254556  | 1.7003485 | 8.060775   | BC023892      | XM_135029    | BC023892      |
| 1422476_at   | 1.01895    | 7.1599736 | 1.0294873  | 7.174816  | 1.2477696  | 7.452242   | 1.6990248 | 7.8975973  | Ifi30         | NM_023065    | Ifi30         |
| 1448259_at   | 0.9478205  | 8.376852  | 0.7812558  | 8.098033  | 1.1127361  | 8.608278   | 1.6972629 | 9.217376   | Fstl1         | NM_008047    | Fstl1         |
| 1417870_x_at | 1.0046523  | 7.406329  | 1.0191706  | 7.427029  | 1.1544441  | 7.6068316  | 1.6863258 | 8.153517   | Ctsc          | NM_022325    | Ctsc          |
| 1418505_at   | 0.95628285 | 10.344017 | 0.9189281  | 10.286532 | 1.2611815  | 10.743284  | 1.6820539 | 11.158732  | Nudt4         | NM_027722    | Nudt4         |
| 1416612_at   | 0.95717967 | 6.0135975 | 0.9885287  | 6.060091  | 0.9027404  | 5.9291196  | 1.6811597 | 6.826193   | Cyp11b1       | NM_009994    | Cyp11b1       |
| 1416431_at   | 1.0288361  | 7.2933083 | 0.943958   | 7.16909   | 1.0799031  | 7.363197   | 1.6780797 | 7.9991064  | Tubb6         | NM_026473    | Tubb6         |
| 1418340_at   | 1.0041622  | 6.8445315 | 0.98570997 | 6.8177743 | 1.2887182  | 7.2044754  | 1.6714215 | 7.5796146  | Fcer1g        | NM_010185    | Fcer1g        |
| 1427884_at   | 0.80331683 | 5.854742  | 0.49140763 | 5.145693  | 0.7831332  | 5.8180304  | 1.6692896 | 6.909935   | Col3a1        | NM_009930    | Col3a1        |
| 1424010_at   | 1.032581   | 5.917348  | 0.92424715 | 5.757443  | 1.2091582  | 6.1450953  | 1.667156  | 6.608482   | Mfap4         | NM_029568    | Mfap4         |
| 1423331_a_at | 0.9775803  | 5.893524  | 0.97113763 | 5.884225  | 1.2248645  | 6.2187448  | 1.6666508 | 6.663074   | Pvr13         | NM_021494    | Pvr13         |
| 1450678_at   | 0.99241936 | 5.9109926 | 1.1175331  | 6.0822887 | 1.0661465  | 6.014376   | 1.6629401 | 6.655707   | Itgfb2        | NM_008405    | Itgfb2        |
| 1419091_a_at | 1.0034273  | 9.630086  | 0.9067113  | 9.483865  | 1.2119215  | 9.902447   | 1.661808  | 10.3579035 | Anxa2         | NM_007585    | Anxa2         |
| 1433694_at   | 0.98052645 | 6.4824786 | 1.2036107  | 6.4888947 | 6.60697    | 6.60697    | 1.6588919 | 7.2410703  | Pde3b         | NM_011055    | Pde3b         |
| 1435748_at   | 0.98999244 | 7.2014427 | 0.9408754  | 7.12803   | 0.9549706  | 7.1494823  | 1.6588342 | 7.946123   | Gda           | NM_010266    | Gda           |
| 1450843_a_at | 1.0061846  | 10.114489 | 1.1845133  | 10.349888 | 1.0461712  | 10.170712  | 1.658129  | 10.83515   | Serpinh1      | NM_009825    | Serpinh1      |
| 1448269_a_at | 1.0066813  | 6.537445  | 0.86276835 | 6.314883  | 1.1808343  | 6.767645   | 1.6576236 | 7.2569547  | Klhl13        | NM_026167    | Klhl13        |
| 1450857_a_at | 0.95510006 | 9.65877   | 0.8659237  | 9.517359  | 1.1985419  | 9.986326   | 1.646234  | 10.444216  | Col1a2        | NM_007743    | Col1a2        |
| 1416529_at   | 0.92998534 | 7.6547737 | 0.9275476  | 7.650987  | 1.0908303  | 7.8849206  | 1.6448286 | 8.477431   | Emp1          | NM_010128    | Emp1          |
| 1416382_at   | 0.98216045 | 8.255087  | 1.0167269  | 8.304899  | 1.1010222  | 8.4199     | 1.6363666 | 8.991553   | Ctsc          | NM_009982    | Ctsc          |
| 1448424_at   | 0.9909355  | 5.621743  | 0.9270956  | 5.52567   | 1.180869   | 5.874729   | 1.6330695 | 6.3424664  | Frbz          | NM_011356    | Frbz          |
| 1437490_x_at | 0.987577   | 6.3797374 | 1.068673   | 6.4935927 | 0.8780723  | 6.210184   | 1.6266407 | 7.099668   | Uap1          | NM_133806    | Uap1          |
| 1416200_at   | 1.0845909  | 5.9284143 | 0.97404134 | 5.7733183 | 1.011867   | 5.8282833  | 1.6219975 | 6.509035   | 9230117N10Rik | NM_133775    | 9230117N10Rik |
| 1418440_at   | 0.936924   | 6.7111473 | 0.82463616 | 6.5269732 | 1.1386473  | 6.9924645  | 1.6191763 | 7.5004034  | Col8a1        | NM_007739    | Col8a1        |
| 1427168_a_at | 0.9024631  | 5.9138017 | 0.8397538  | 5.8099    | 1.0934954  | 6.190809   | 1.6187692 | 6.7567587  | Col14a1       | NM_181277    | Col14a1       |
| 1421854_at   | 0.9906599  | 6.642128  | 0.7703918  | 6.279331  | 0.7998152  | 6.333405   | 1.6165497 | 7.3485847  | Fgl2          | NM_008013    | Fgl2          |
| 1424542_at   | 0.9830299  | 6.2207255 | 0.9093027  | 6.108251  | 1.1950645  | 6.5025067  | 1.6156895 | 6.937568   | S100a4        | NM_011311    | S100a4        |
| 1419666_x_at | 0.9477823  | 6.240391  | 1.0572447  | 6.3980722 | 0.91690254 | 6.192605   | 1.6146533 | 7.008987   | Nupr1         | NM_019738    | Nupr1         |
| 1416304_at   | 0.9832122  | 7.24458   | 0.99026126 | 7.2548857 | 0.9920636  | 7.257509   | 1.6122676 | 7.9580956  | Litaf         | NM_019980    | Litaf         |
| 1448383_at   | 0.9944317  | 6.1273203 | 0.85007733 | 5.9010425 | 1.0168954  | 6.159548   | 1.611043  | 6.8233714  | Mmp14         | NM_008608    | Mmp14         |
| 1438858_x_at | 0.9686976  | 6.8923354 | 0.91953224 | 6.817189  | 1.1813581  | 7.1786633  | 1.6075829 | 7.62311    | H2-Aa         | NM_010378    | H2-Aa         |
| 1456733_x_at | 0.9886338  | 10.18651  | 1.124555   | 10.372356 | 0.98903644 | 10.1870985 | 1.6055528 | 10.886072  | Serpinh1      | NM_009825    | Serpinh1      |
| 1449388_at   | 1.0106173  | 7.019804  | 0.97305894 | 6.965166  | 1.1614002  | 7.2204328  | 1.6016104 | 7.6840906  | Tlbs4         | NM_011582    | Tlbs4         |
| 1456257_at   | 0.9878855  | 5.7371106 | 1.0704932  | 5.852971  | 1.0284867  | 5.7952185  | 1.5993364 | 6.4321685  | C130065N10Rik | AKO48489     | C130065N10Rik |
| 1417104_at   | 0.9958698  | 7.268701  | 0.9173899  | 7.150279  | 1.2490193  | 7.5954676  | 1.5947503 | 7.948003   | Emp3          | NM_010129    | Emp3          |
| 1451716_at   | 0.9397823  | 5.6264205 | 1.0608869  | 5.8012924 | 1.2409263  | 6.027439   | 1.5938294 | 6.3885193  | Mafb          | NM_010658    | Mafb          |
| 1458663_at   | 0.94522625 | 5.4759736 | 1.0775522  | 5.6649995 | 1.139331   | 5.745429   | 1.5934167 | 6.2293653  | Large         | NM_010687    | Large         |
| 1417219_s_at | 1.0006574  | 8.469743  | 0.97207505 | 8.427935  | 1.2480435  | 8.788464   | 1.5933136 | 9.140825   | Tmsb10        | NM_025284    | Tmsb10        |
| 1437226_x_at | 0.99895006 | 6.265594  | 0.99193555 | 6.255428  | 1.2321647  | 6.5683045  | 1.592904  | 6.938769   | Marcks1l      | NM_010807    | Marcks1l      |
| 1422748_at   | 1.012994   | 5.883848  | 0.9927641  | 5.8547454 | 1.2003858  | 6.1287208  | 1.5849699 | 6.5296783  | Zfxh1b        | NM_015753    | Zfxh1b        |
| 1418364_a_at | 1.0628458  | 10.093999 | 1.1483594  | 10.20564  | 1.1739864  | 10.237482  | 1.584074  | 10.669706  | Ftl1          | NM_102404    | Ftl1          |
| 1419149_at   | 0.87852097 | 6.6198826 | 0.8351848  | 6.546901  | 0.83681935 | 6.549722   | 1.5830557 | 7.469446   | Serpine1      | NM_008871    | Serpine1      |
| 1449168_a_at | 0.96466595 | 7.3315063 | 0.8709718  | 7.1841025 | 0.9942852  | 7.3751364  | 1.5798776 | 8.043218   | Akap2         | NM_001035532 | Akap2         |
| 1419551_s_at | 0.9869897  | 8.777921  | 0.9481346  | 8.719978  | 1.2033465  | 9.063866   | 1.5736321 | 9.450912   | Stk39         | NM_016866    | Stk39         |
| 1427638_at   | 1.0631886  | 5.6130285 | 1.2711715  | 5.87079   | 1.0822487  | 5.6386633  | 1.5722064 | 6.1774216  | Zbtb16        | XM_134826    | Zbtb16        |
| 1419550_a_at | 1.00796    | 8.013017  | 1.0060033  | 8.010213  | 1.3091148  | 8.390169   | 1.5705875 | 8.652883   | Stk39         | NM_016866    | Stk39         |
| 1425837_a_at | 1.024429   | 8.243774  | 1.1867374  | 8.456208  | 1.028324   | 8.249503   | 1.562355  | 8.85293    | Ccrn4l        | NM_009834    | Ccrn4l        |
| 1438796_at   | 0.95962983 | 6.367538  | 0.97657955 | 6.3927975 | 0.99837255 | 6.4246383  | 1.5607556 | 7.0692325  | Nr4a3         | NM_015743    | Nr4a3         |
| 1433696_at   | 1.003966   | 6.320681  | 1.1811596  | 6.555175  | 1.1236407  | 6.4831514  | 1.5596546 | 6.9561973  | D17Ert441e    | NM_198937    | D17Ert441e    |
| 1449018_at   | 1.0258241  | 10.15477  | 1.087646   | 10.239195 | 1.2321012  | 10.419107  | 1.559418  | 10.758994  | Pfn1          | NM_011072    | Pfn1          |
| 1456516_x_at | 0.9820016  | 6.3512583 | 1.1170542  | 6.5371604 | 0.91250217 | 6.245361   | 1.5590526 | 7.0181313  | Uap1          | NM_133806    | Uap1          |
| 1439805_at   | 0.96803933 | 5.9268513 | 0.9793086  | 5.943549  | 1.285685   | 6.336251   | 1.5587877 | 6.6141386  | Nfat5         | NM_018823    | Nfat5         |

|              |            |            |            |           |            |           |             |           |               |              |                  |
|--------------|------------|------------|------------|-----------|------------|-----------|-------------|-----------|---------------|--------------|------------------|
| 1416743_at   | 0.9714469  | 7.972106   | 1.0638582  | 8.103205  | 0.92894375 | 7.907562  | 1.5141578   | 8.612414  | Uap1          | NM_133806    | Uap1             |
| 1453015_at   | 0.9225698  | 6.3175883  | 1.0660883  | 6.5261855 | 1.1256291  | 6.6045895 | 1.513696    | 7.0319333 | 5830471E12Rik | XM_356109    | 5830471E12Rik    |
| 1450234_at   | 0.9888681  | 6.0021167  | 1.0608853  | 6.103535  | 1.0582544  | 6.0999527 | 1.511458    | 6.6142077 | Ms4a6c        | NM_028595    | Ms4a6c           |
| 1418753_at   | 1.0010097  | 7.4297295  | 0.9677052  | 7.380913  | 1.062545   | 7.515797  | 1.5077708   | 8.020691  | Gfpt2         | NM_013529    | Gfpt2            |
| 1423141_at   | 0.9864864  | 6.3065357  | 1.0077513  | 6.3373046 | 1.2222502  | 6.6157045 | 1.5071927   | 6.918029  | Lip1          | NM_021460    | Lip1             |
| 1452279_at   | 0.99593264 | 5.9179273  | 1.146706   | 6.1213026 | 1.1237928  | 6.092183  | 1.5062482   | 6.5147667 | Pfc           | NM_008823    | Pfc              |
| 1423756_s_at | 0.9897728  | 9.204386   | 0.9229191  | 9.103493  | 1.2803848  | 8.9775794 | 1.4957408   | 9.8000765 | Igfbp4        | NM_010517    | Igfbp4           |
| 1426452_a_at | 1.0439188  | 6.1372776  | 1.043728   | 6.137014  | 0.97157896 | 6.033671  | 1.4934398   | 6.653907  | Rsb30         | NM_029494    | Rsb30            |
| 1451987_at   | 0.95816404 | 6.1510296  | 0.9108604  | 6.077987  | 0.9331159  | 6.1128135 | 1.4895802   | 6.787591  | Arrb2         | NM_145429    | Arrb2            |
| 1436778_at   | 0.96891093 | 6.1298537  | 0.9533745  | 6.1065326 | 1.0322082  | 6.221152  | 1.4872243   | 6.74804   | Cybb          | NM_007807    | Cybb             |
| 1448213_at   | 0.98411953 | 8.414818   | 0.8636822  | 8.226484  | 1.075193   | 8.542508  | 1.4870582   | 9.010374  | Anxa1         | NM_010730    | Anxa1            |
| 1415871_at   | 0.98705083 | 7.015809   | 1.0125655  | 7.0526276 | 1.2191285  | 7.320463  | 1.4837345   | 7.603846  | Tgfb1         | NM_009369    | Tgfb1            |
| 1448561_at   | 1.0162764  | 5.8788924  | 1.0642918  | 5.9454927 | 1.0894784  | 5.9792366 | 1.4837154   | 6.4248137 | Ncf2          | NM_010877    | Ncf2             |
| 1416782_s_at | 0.9929709  | 6.324748   | 1.0587239  | 6.4172516 | 1.2088771  | 6.6085925 | 1.4832001   | 6.9036384 | Praf2         | NM_138602    | Praf2            |
| 1455824_x_at | 0.97522837 | 6.801903   | 1.1155784  | 6.995883  | 1.1421721  | 7.029871  | 1.4807017   | 7.404372  | Itm1          | NM_008408    | Itm1             |
| 1439432_x_at | 0.93599564 | 9.132306   | 1.1335752  | 9.408613  | 1.0194509  | 9.255525  | 1.4798933   | 9.7932226 | Morf4I2       | NM_019768    | Morf4I2 /// LOC4 |
| 1423274_at   | 0.9617019  | 5.9934425  | 1.0586463  | 6.132002  | 1.0114604  | 6.066221  | 1.4788896   | 6.6142955 | Ddx26         | NM_008715    | Ddx26            |
| 1424186_at   | 1.0189188  | 9.078852   | 0.92738813 | 9.843058  | 1.1213682  | 9.217073  | 1.4786403   | 9.616085  | 2610001E17Rik | NM_026439    | 2610001E17Rik    |
| 1422437_at   | 0.9450059  | 7.635199   | 0.80962807 | 7.4121346 | 0.9168917  | 7.591627  | 1.4763718   | 8.27886   | Col5a2        | NM_007737    | Col5a2           |
| 1423433_at   | 0.97977555 | 5.873749   | 1.0299271  | 5.9457674 | 1.0338728  | 5.951284  | 1.4753498   | 6.4642825 | Trove2        | NM_010373    | Trove2           |
| 1451344_at   | 0.9854561  | 5.714731   | 0.99817    | 5.7332253 | 1.1875855  | 5.983899  | 1.4724597   | 6.294096  | BC025600      | NM_146162    | BC025600         |
| 1418576_at   | 1.0123229  | 7.440408   | 1.1285248  | 7.597168  | 1.0640755  | 7.5123305 | 1.4706389   | 7.9791737 | Yipf5         | NM_023311    | Yipf5            |
| 1417460_at   | 1.0384337  | 9.855713   | 0.96167773 | 9.744928  | 1.1225432  | 9.968075  | 1.4650284   | 10.352232 | Ifitm2        | NM_030694    | Ifitm2           |
| 1428708_x_at | 0.9871166  | 9.231993   | 0.9584033  | 9.189405  | 1.2273415  | 9.546237  | 1.4630815   | 9.799711  | 2610009E16Rik | NM_026988    | 2610009E16Rik    |
| 1456170_x_at | 1.0000473  | 10.395889  | 1.2819448  | 10.754155 | 1.0821699  | 10.509748 | 1.4614277   | 10.9432   | Calr          | NM_007591    | Calr             |
| 1417606_a_at | 1.0002991  | 10.42104   | 1.2603484  | 10.754432 | 1.0862418  | 10.539954 | 1.4607569   | 10.967325 | Calr          | NM_007591    | Calr             |
| 1417620_at   | 0.96230274 | 5.907132   | 1.128682   | 6.1372085 | 1.135265   | 6.1455984 | 1.4578813   | 6.5064425 | Rac2          | NM_009008    | Rac2             |
| 1426024_a_at | 0.9681719  | 5.7916093  | 0.9899234  | 5.8236623 | 1.1537766  | 6.0446377 | 1.4561919   | 6.3804746 | Dbn1          | NM_019813    | Dbn1             |
| 1437406_x_at | 0.978599   | 9.721923   | 0.94807225 | 9.676201  | 1.256366   | 10.08239  | 1.4541817   | 10.29334  | Igfbp4        | NM_105157    | Igfbp4           |
| 1448242_at   | 1.0087695  | 7.635167   | 1.0699809  | 7.7201557 | 1.0936255  | 7.75169   | 1.4537525   | 8.162353  | Sec61a1       | NM_172574    | Sec61a1          |
| 1424906_at   | 0.9938612  | 6.1602316  | 1.0247946  | 6.204445  | 1.1545014  | 6.3763857 | 1.453167    | 6.708316  | Pqlc3         | NM_016904    | Pqlc3            |
| 1418538_at   | 1.0134752  | 6.484659   | 1.0243982  | 6.500125  | 1.2259823  | 6.759287  | 1.4517415   | 7.003133  | Kdelr3        | NM_134099    | Kdelr3           |
| 1417786_a_at | 0.9801481  | 6.125955   | 1.0717473  | 6.254848  | 1.1273068  | 6.3277636 | 1.4515872   | 6.692515  | Rgs19         | NM_026446    | Rgs19            |
| 1435476_a_at | 0.9662222  | 7.095453   | 0.96566135 | 7.094615  | 1.0407215  | 7.2026095 | 1.4515082   | 7.682578  | Fcgr2b        | NM_010187    | Fcgr2b           |
| 1427076_at   | 0.97711498 | 6.9607997  | 1.004599   | 7.000768  | 1.1197695  | 7.1573496 | 1.4513041   | 7.5314975 | Mpeg1         | XM_129176    | Mpeg1            |
| 1456028_x_at | 0.95734054 | 7.8397965  | 0.90483445 | 7.758418  | 1.1405035  | 8.092363  | 1.450636    | 8.439378  | Marcks        | NM_008538    | Marcks           |
| 1424208_at   | 0.99404454 | 6.2879586  | 0.77468127 | 5.928251  | 1.2042153  | 6.5646696 | 1.4494333   | 6.832065  | Ptger4        | NM_008965    | Ptger4           |
| 1449142_a_at | 1.000997   | 7.669184   | 1.0706253  | 7.7662    | 1.0700761  | 7.76546   | 1.4448689   | 8.198686  | Yipf5         | NM_023311    | Yipf5            |
| 1417455_at   | 0.96679544 | 6.5777903  | 1.0250827  | 6.662248  | 1.1290537  | 6.801622  | 1.4440314   | 7.15661   | Tgfb3         | NM_009368    | Tgfb3            |
| 1436938_at   | 1.015249   | 0.88639295 | 6.530572   | 6.0764395 | 1.0300305  | 6.747241  | 1.4437126   | 7.234337  | Rbms3         | NM_178600    | Rbms3            |
| 1418883_a_at | 1.0029256  | 10.191462  | 1.0979694  | 10.322084 | 1.1570662  | 10.397717 | 1.4435784   | 10.716896 | Pabpc1        | NM_008774    | Pabpc1           |
| 1456125_a_at | 1.0219672  | 10.823666  | 1.1322184  | 10.971147 | 1.028698   | 10.928698 | 1.442947    | 11.321336 | Dncl1         | NM_019682    | Dncl1            |
| 1419527_at   | 1.0689367  | 5.7706504  | 1.0093789  | 5.6879416 | 1.2403834  | 5.9852605 | 1.4403566   | 6.2009006 | Comp          | NM_016685    | Comp             |
| 1422190_at   | 0.9847448  | 5.570875   | 0.9857965  | 5.5724154 | 1.0879761  | 5.7147007 | 1.4387236   | 6.1178427 | C5r1          | NM_007577    | C5r1             |
| 1428585_at   | 0.9677066  | 6.8578377  | 0.95716965 | 6.842042  | 1.131333   | 7.0832195 | 1.4386151   | 7.4298763 | Actn1         | NM_134516    | Actn1            |
| 1460221_at   | 1.0356992  | 9.5209465  | 1.203917   | 9.738077  | 1.1082554  | 9.618632  | 1.4362696   | 9.992669  | Ptges3        | NM_019766    | Ptges3           |
| 1421488_at   | 1.0144773  | 6.368849   | 0.9109845  | 6.2324358 | 1.3234358  | 6.7524004 | 1.4346994   | 6.868861  | Rabgap1l      | NM_013862    | Rabgap1l         |
| 1429177_x_at | 0.9764705  | 6.5074553  | 1.1613754  | 6.576413  | 1.0939059  | 6.6712956 | 1.4345673   | 7.0624228 | Sox17         | NM_011441    | Sox17            |
| 1451340_at   | 1.015249   | 6.0533266  | 1.0305327  | 6.074883  | 1.050658   | 6.102786  | 1.4339001   | 6.5514374 | Arid5a        | NM_145996    | Arid5a           |
| 1436229_at   | 0.9851261  | 5.9177775  | 1.1125757  | 6.093301  | 1.116372   | 6.098215  | 1.4333973   | 6.4588356 | C130065N10Rik | NM_172513    | ---              |
| 1424187_at   | 1.0017624  | 7.4384255  | 0.91857415 | 7.3133526 | 1.1390676  | 7.6237383 | 1.4324629   | 7.954383  | 2610001E17Rik | NM_026439    | 2610001E17Rik    |
| 1455994_x_at | 0.9697533  | 7.2289696  | 1.0614119  | 7.3592644 | 1.1481413  | 7.47258   | 1.4318746   | 7.791185  | Elovl1        | NM_019422    | Elovl1           |
| 1422993_s_at | 1.002266   | 7.248286   | 1.1380459  | 7.431579  | 1.1953075  | 7.5024023 | 1.4301842   | 7.761221  | Thoc4         | NM_011568    | Thoc4 /// Refbp2 |
| 1448606_at   | 0.9462942  | 6.8830395  | 0.91935915 | 6.841379  | 1.1237879  | 7.1310487 | 1.429649    | 7.47834   | Edg2          | NM_010336    | Edg2             |
| 1424176_a_at | 0.9830365  | 6.2619257  | 0.9763177  | 6.2520313 | 1.1280879  | 6.4604883 | 1.4292723   | 6.80189   | Anxa4         | NM_013471    | Anxa4            |
| 1450914_at   | 1.0372455  | 8.233984   | 1.0745841  | 8.285005  | 1.3078723  | 8.568448  | 1.4280987   | 8.695322  | Ppp1r14b      | NM_008889    | Ppp1r14b         |
| 1448919_at   | 1.0059987  | 6.813863   | 0.8954796  | 6.6459665 | 1.1459873  | 7.001825  | 1.4266149   | 7.3178306 | Cd302         | NM_025422    | Cd302            |
| 1433806_x_at | 0.9971306  | 10.217119  | 1.2452742  | 10.493664 | 1.0290784  | 10.290784 | 1.4261837   | 10.733424 | Calr          | NM_007591    | Calr             |
| 1417133_at   | 1.0182093  | 8.857956   | 0.9428439  | 8.747012  | 1.0525113  | 8.905757  | 1.4250871   | 9.342972  | Pmp22         | NM_008885    | Pmp22            |
| 1439455_x_at | 0.9774042  | 7.7806125  | 1.0324404  | 7.859644  | 0.9640363  | 7.760745  | 1.4237376   | 8.323269  | Capz1         | NM_009797    | Capz1            |
| 1441811_x_at | 0.9756777  | 5.8132315  | 0.98574525 | 5.8280416 | 1.1527967  | 6.053893  | 1.423403    | 6.358099  | 0610011104Rik | NM_025326    | 0610011104Rik    |
| 1416308_at   | 0.96519893 | 6.862022   | 0.8693505  | 6.7111335 | 0.86978716 | 6.7111858 | 1.4218949   | 7.4209385 | Ugdh          | NM_009466    | Ugdh             |
| 1429588_at   | 0.9415439  | 6.1929617  | 0.9405674  | 6.1914644 | 0.7276194  | 5.821117  | 1.421839    | 6.7876196 | 2810474019Rik | NM_026054    | 2810474019Rik    |
| 1424235_at   | 1.0325356  | 6.5127444  | 1.1679605  | 6.690545  | 1.1240052  | 6.635202  | 1.4203985   | 6.972849  | Ormdl2        | NM_024180    | Ormdl2           |
| 1455870_at   | 0.94594437 | 9.081912   | 0.9215686  | 8.964247  | 0.8672964  | 8.95668   | 1.4201386   | 9.668116  | Akap2         | NM_001035532 | Akap2            |
| 1417432_a_at | 1.0186927  | 7.9787846  | 1.0345044  | 8.001005  | 1.1105468  | 8.103335  | 1.4190165   | 8.456957  | Gnb1          | NM_008142    | Gnb1             |
| 1449002_at   | 0.9767896  | 6.421726   | 0.97617227 | 6.420814  | 1.1622434  | 6.6725187 | 1.4189177   | 6.9603972 | Phlda3        | NM_013750    | Phlda3           |
| 1448682_at   | 1.0050842  | 9.907213   | 1.0696156  | 9.996989  | 1.0438302  | 9.961784  | 1.4186914   | 10.404457 | Dncl1         | NM_019682    | Dncl1            |
| 1455033_at   | 1.0335255  | 6.623285   | 1.0844362  | 6.6926565 | 1.1172814  | 6.735704  | 1.4181749   | 7.0797467 | B430201A12Rik | XM_283903    | B430201A12Rik    |
| 1455242_at   | 0.9846151  | 6.5279727  | 0.95267504 | 6.480397  | 1.1446784  | 6.745283  | 1.4180232   | 7.0542216 | Foxp1         | NM_053202    | Foxp1            |
| 1455732_at   | 1.0080037  | 7.8260674  | 0.97960365 | 7.784837  | 1.0228637  | 7.847181  | 1.4176837   | 8.318102  | 1700025G04Rik | NM_019790    | 1700025G04Rik    |
| 1425676_a_at | 1.005366   | 7.356179   | 1.0247066  | 7.38367   | 1.1466823  | 7.545924  | 1.4136779   | 7.8479123 | Elovl1        | NM_019422    | Elovl1           |
| 1451259_at   | 1.02793    | 9.147489   | 1.0232334  | 9.140882  | 1.1675258  | 9.331202  | 1.4134398   | 9.6069565 | Rexo2         | NM_024233    | Rexo2            |
| 1448651_at   | 0.9921907  | 6.094146   | 1.1484926  | 6.305198  | 1.1695311  | 6.331387  | 1.4113706   | 6.6025534 | Nudt5         | NM_016918    | Nudt5            |
| 1437155_a_at | 1.0371339  | 7.026635   | 1.0514745  | 7.0464473 | 1.2221005  | 7.2633963 | 1.4104484   | 7.470187  | Wwtr1         | NM_133784    | Wwtr1            |
| 1447903_x_at | 1.0065639  | 7.939098   | 1.0058333  | 7.9380507 | 1.1077557  | 8.077296  | 1.409241    | 8.424578  | Apis2         | NM_026887    | Apis2            |
| 1422286_a_at | 0.9940923  | 5.6998477  | 1.0143583  | 5.728963  | 1.1398578  | 5.8972497 | 1.4080993   | 6.2021446 | Tgif          | NM_009372    | Tgif             |
| 1450904_at   | 1.0169958  | 7.626179   | 1.0594519  | 7.685184  | 1.0041121  | 7.607786  | 1.4080954</ |           |               |              |                  |

|                |            |           |            |           |            |           |           |            |               |              |                 |
|----------------|------------|-----------|------------|-----------|------------|-----------|-----------|------------|---------------|--------------|-----------------|
| 1417143_at     | 0.9675001  | 6.049726  | 0.8343282  | 5.836079  | 1.0124941  | 6.115306  | 1.3796854 | 6.5617313  | Edg2          | NM_010336    | Edg2            |
| 1422537_a_at   | 0.9684159  | 6.5696297 | 0.92554    | 6.504298  | 1.0699029  | 6.7134113 | 1.3766853 | 7.07713    | Id2           | NM_010496    | Id2             |
| 1418110_a_at   | 0.95784086 | 5.8978276 | 1.0414923  | 6.018622  | 1.0875602  | 6.081065  | 1.3761555 | 6.4206133  | Inpp5d        | NM_010566    | Inpp5d          |
| 1426534_a_at   | 0.9823162  | 6.073965  | 1.186731   | 6.3466988 | 1.1441741  | 6.294012  | 1.375831  | 6.5600009  | Arfgap3       | NM_025445    | Arfgap3         |
| 1436714_at     | 0.93979734 | 8.445652  | 0.9749125  | 8.498575  | 1.053814   | 8.61085   | 1.3735404 | 8.99313    | Lpp           | NM_178665    | Lpp             |
| 1417777_at     | 1.0002639  | 5.680326  | 1.0391315  | 5.735324  | 1.1334146  | 5.860621  | 1.3735118 | 6.1378145  | Ltb4d         | NM_025968    | Ltb4d           |
| 1415971_at     | 0.9416198  | 8.515364  | 0.9310829  | 8.499129  | 1.094434   | 8.732332  | 1.3730102 | 9.05949    | Marcks        | NM_025445    | Marcks          |
| 1460180_at     | 1.0283555  | 7.7773776 | 0.9825142  | 7.7115884 | 1.1229165  | 7.9042892 | 1.3718609 | 8.193172   | Hexb          | NM_010422    | Hexb            |
| 1437497_a_at   | 1.0124766  | 8.750271  | 1.1709605  | 8.960073  | 0.8363878  | 8.474626  | 1.3713635 | 9.187993   | Hspca         | NM_010480    | Hspca /// LOC54 |
| 1422705_at     | 0.94743264 | 6.133823  | 0.9338197  | 6.1129436 | 0.9834934  | 6.187715  | 1.3702992 | 6.6662188  | Tmepai        | NM_022995    | Tmepai          |
| 1418946_at     | 0.9949497  | 6.1633754 | 0.9852718  | 6.149274  | 1.022369   | 6.202596  | 1.369918  | 6.6247697  | St3gal1       | NM_009177    | St3gal1         |
| 1417998_at     | 1.0236293  | 8.920594  | 1.1956733  | 9.144723  | 1.0353255  | 8.936985  | 1.3689351 | 9.339954   | Ptges3        | NM_019766    | Ptges3          |
| 1427347_s_at   | 1.0195544  | 8.18725   | 1.0731908  | 8.261219  | 0.91103756 | 8.024895  | 1.3676062 | 8.610965   | Tubb2         | NM_009450    | Tubb2 /// 24101 |
| 1422593_at     | 0.98874557 | 8.846316  | 0.9694956  | 8.81795   | 1.0666558  | 8.955738  | 1.366208  | 9.312821   | Ap3s1         | NM_009681    | Ap3s1           |
| 1418892_at     | 0.9620734  | 8.290938  | 0.90635806 | 8.204871  | 1.0765381  | 8.453116  | 1.3660485 | 8.796727   | Rhoj          | NM_023275    | Rhoj            |
| 1452214_at     | 0.9796976  | 8.104209  | 0.9581257  | 8.072086  | 0.90205824 | 7.985092  | 1.3646497 | 8.582331   | Rhoj          | NM_011386    | Rhoj            |
| 1450656_at     | 0.98652214 | 6.0741196 | 1.1068057  | 6.2400985 | 1.1383237  | 6.280607  | 1.3645979 | 6.5421724  | Gna13         | NM_010303    | Gna13           |
| 1437626_at     | 0.97853506 | 8.914692  | 1.0007703  | 8.947107  | 1.0897336  | 6.9240734 | 1.3640734 | 9.393918   | Zfp3612       | NM_001001806 | Zfp3612         |
| 1460513_a_at   | 0.99589485 | 6.5312653 | 1.0548306  | 6.614211  | 1.1599702  | 6.751288  | 1.3623495 | 6.983297   | Ednra         | NM_010332    | Ednra           |
| 1428319_at     | 0.933578   | 6.1942267 | 0.94593793 | 6.2132015 | 0.9049988  | 6.149372  | 1.3618345 | 6.7389355  | Pdlim7        | NM_026131    | Pdlim7          |
| 1423611_at     | 1.0124034  | 7.753388  | 0.939606   | 7.645732  | 1.1635251  | 7.9541063 | 1.3616581 | 8.180968   | Akp2          | NM_007431    | Akp2            |
| 1437503_a_at   | 0.99213165 | 9.017252  | 0.97565067 | 8.993086  | 1.170095   | 9.552575  | 1.3587941 | 9.47076    | Scotin        | NM_025858    | Scotin          |
| 1417251_at     | 1.0009423  | 8.798182  | 0.90922356 | 8.659531  | 1.101419   | 8.936187  | 1.357418  | 9.237688   | Palmd         | NM_023245    | Palmd           |
| 1454211_a_at   | 0.9638232  | 6.740016  | 1.0740491  | 6.8962355 | 1.064303   | 6.883085  | 1.356444  | 7.2310896  | Shrm          | NM_015756    | Shrm            |
| 1417817_a_at   | 1.0579114  | 7.7468405 | 1.082267   | 7.7796783 | 1.1918213  | 7.91879   | 1.3539212 | 8.102766   | Wwtr1         | NM_133784    | Wwtr1           |
| 1427260_a_at   | 0.99190456 | 8.441467  | 0.9811872  | 8.425795  | 1.1244403  | 8.6224    | 1.3534064 | 8.88979    | Tpm3          | NM_023275    | Tpm3            |
| 1425610_s_at   | 1.0068988  | 6.567505  | 0.9864606  | 6.557919  | 1.2320589  | 6.858657  | 1.3523494 | 6.993054   | Gaint2        | NM_139712    | Gaint2          |
| 1416414_at     | 0.973069   | 6.793686  | 0.84293777 | 6.58657   | 1.0758218  | 6.938511  | 1.3512073 | 7.2673206  | Emilin1       | NM_133918    | Emilin1         |
| 1454611_a_at   | 1.0133995  | 10.374015 | 1.0848639  | 10.471479 | 1.1204017  | 10.51798  | 1.3510318 | 10.788026  | Calm1         | NM_009790    | Calm1           |
| 1435652_a_at   | 1.0116647  | 10.006792 | 1.0336715  | 10.037837 | 1.2318422  | 10.290877 | 1.3509266 | 10.424009  | Gna12         | NM_008138    | Gna12           |
| 1422607_at     | 1.0029843  | 5.882039  | 0.9616219  | 5.8212814 | 1.1983399  | 6.138777  | 1.3499695 | 6.310667   | Etn1          | NM_007697    | Etn1            |
| 1420502_at     | 1.0124801  | 7.648141  | 0.9336536  | 7.5312066 | 1.1782691  | 7.866916  | 1.34906   | 8.062202   | Sat1          | NM_009121    | Sat1            |
| 1437478_s_at   | 1.0309327  | 9.440737  | 1.0856307  | 9.51532   | 1.1349605  | 9.579428  | 1.3483508 | 9.827982   | Efh2          | NM_025994    | Efh2            |
| 1422555_s_at   | 0.9787723  | 7.6944084 | 1.0228406  | 7.757945  | 1.1906822  | 7.977152  | 1.345068  | 8.153043   | Gna13         | NM_010303    | Gna13           |
| 1455571_x_at   | 1.0093653  | 10.425312 | 1.0591887  | 10.494823 | 1.1358749  | 10.595668 | 1.3450454 | 10.8395195 | Calm1         | NM_009790    | Calm1           |
| 1421034_a_at   | 0.97306514 | 5.8728433 | 1.0804347  | 6.023847  | 1.118227   | 6.073448  | 1.3421153 | 6.336744   | I4ra          | NM_001008700 | I4ra            |
| 1447819_x_at   | 0.93507665 | 7.7901125 | 1.0275542  | 7.92617   | 1.1082377  | 8.035223  | 1.3413254 | 8.310616   | ---           | BB546487     | ---             |
| 1423642_at     | 1.0171031  | 10.127514 | 1.013441   | 10.27031  | 1.1198417  | 10.414344 | 1.3370054 | 10.6700535 | 4930542G03Rik | NM_146116    | 4930542G03Rik   |
| 1427256_at     | 0.8324486  | 5.7449656 | 0.69707644 | 5.4889207 | 0.7661765  | 5.625281  | 1.3369257 | 6.428451   | Cspg2         | XM_488510    | Cspg2           |
| 1425567_a_at   | 0.99809945 | 9.718658  | 0.9879863  | 9.703967  | 1.1239502  | 9.889981  | 1.3367398 | 10.140122  | Anxa5         | NM_009673    | Anxa5           |
| 1423771_at     | 1.0052655  | 6.4329767 | 0.970722   | 6.3825297 | 1.173378   | 6.656068  | 1.3367064 | 6.8440824  | Pkrcdbp       | NM_028444    | Pkrcdbp         |
| 1443299_at     | 0.93160146 | 6.765758  | 0.7924631  | 6.5323887 | 1.377783   | 7.330322  | 1.3365694 | 7.286508   | Pdlim3        | NM_016798    | Pdlim3          |
| 1429234_s_at   | 0.9284246  | 7.061876  | 0.992801   | 7.1585956 | 0.9318964  | 7.0672603 | 1.3364339 | 7.5874076  | 12-Sep        | NM_001009818 | 12-Sep          |
| 1441437_at     | 0.83223    | 5.6271415 | 1.0678705  | 5.986824  | 1.014413   | 5.9127326 | 1.3355181 | 6.309487   | Rbms1         | NM_020296    | Rbms1           |
| 1428108_x_at   | 0.9979959  | 7.3600473 | 1.0171025  | 7.387407  | 1.2549722  | 7.690597  | 1.33512   | 7.779911   | Tmcc2         | NM_178874    | Tmcc2           |
| 1453263_at     | 1.0309216  | 6.674886  | 0.9029578  | 6.4836826 | 1.1972995  | 6.8907356 | 1.3342584 | 7.0469894  | Mak10         | NM_030153    | Mak10           |
| 1426896_at     | 0.96251297 | 6.4897594 | 0.9947723  | 6.5373197 | 0.8836186  | 6.3663774 | 1.3326806 | 6.959213   | Zfp191        | NM_021559    | Zfp191          |
| 1436236_x_at   | 0.9909149  | 6.196812  | 1.05835    | 6.2917957 | 1.157049   | 6.4204288 | 1.331518  | 6.623051   | Cot11         | NM_028071    | Cot11           |
| 1423732_at     | 0.9891547  | 8.317371  | 1.0552219  | 8.410649  | 1.0763212  | 8.439211  | 1.3311235 | 8.745747   | Tram1         | NM_028173    | Tram1           |
| 1421346_a_at   | 0.9651939  | 7.7866273 | 0.91028774 | 7.7021313 | 1.1423104  | 8.029691  | 1.3297278 | 8.248867   | Slc6a6        | NM_009320    | Slc6a6          |
| 1416882_at     | 1.0041848  | 7.311924  | 1.029676   | 7.348089  | 1.2002298  | 7.5692096 | 1.3256551 | 7.712604   | Rgs10         | NM_026418    | Rgs10           |
| 1429045_at     | 1.0229621  | 7.4130445 | 1.0889156  | 7.503184  | 1.1516036  | 7.5839357 | 1.3254491 | 7.7867727  | Smurf2        | NM_025481    | Smurf2          |
| 1435517_x_at   | 1.0134273  | 6.9831295 | 1.0836837  | 7.0798306 | 1.1121699  | 7.1172643 | 1.3236485 | 7.3684063  | Ralb          | NM_022327    | Ralb            |
| 1424067_at     | 1.0235295  | 6.2358994 | 0.8407165  | 5.952038  | 1.0215886  | 6.2331605 | 1.3223714 | 6.605474   | Icam1         | NM_010493    | Icam1           |
| 1454900_s_at   | 0.95419276 | 8.625203  | 1.0574698  | 8.773467  | 1.146993   | 8.890707  | 1.3211763 | 9.094673   | Phr1          | NM_207215    | Phr1            |
| 1449437_at     | 1.0293874  | 6.0762067 | 1.04013    | 6.0911846 | 0.94904244 | 5.9589653 | 1.3209677 | 6.436016   | D6Wsu163e     | NM_138594    | D6Wsu163e       |
| 1425076_at     | 1.0237887  | 5.9285913 | 1.1365728  | 6.079364  | 1.184341   | 6.138758  | 1.3185315 | 6.293606   | Dnajc18       | NM_029669    | Dnajc18         |
| 1424524_at     | 0.9987838  | 6.432111  | 0.9509576  | 6.3613195 | 0.9611552  | 6.3767076 | 1.3168776 | 6.8309875  | 1200002N14Rik | NM_027878    | 1200002N14Rik   |
| 1450625_at     | 0.907426   | 5.649829  | 0.6552105  | 5.1800075 | 0.7208909  | 5.3178296 | 1.3154323 | 6.185514   | Col5a2        | NM_007737    | Col5a2          |
| 1436971_x_at   | 0.99623734 | 9.191018  | 1.0505123  | 9.2675495 | 1.0400554  | 9.253117  | 1.3129399 | 9.589257   | Ywhaz         | NM_011740    | Ywhaz           |
| 1422053_at     | 0.990862   | 6.12795   | 0.9412739  | 6.053881  | 1.1130099  | 6.295661  | 1.3101059 | 6.5308776  | Inhba         | NM_008380    | Inhba           |
| 1452094_at     | 0.9726989  | 7.6383247 | 1.1273931  | 7.85125   | 0.8342936  | 7.4168863 | 1.3098806 | 8.067695   | P4ha1         | NM_011030    | P4ha1           |
| 1448123_s_at   | 0.99607974 | 7.092154  | 0.9656317  | 7.047366  | 1.1512724  | 7.3010507 | 1.3092251 | 7.486534   | Tgfb1         | NM_009369    | Tgfb1           |
| 1418004_a_at   | 0.99779326 | 8.845162  | 0.8496261  | 8.613249  | 1.0785923  | 8.957499  | 1.3079314 | 9.235637   | 1810009M01Rik | NM_023056    | 1810009M01Rik   |
| AFX-b-ActinMur | 1.0252278  | 11.248691 | 0.94283193 | 11.127819 | 1.1902928  | 11.464063 | 1.3061035 | 11.598015  | Actb          | NM_007393    | Actb            |
| 1416466_at     | 1.0170752  | 9.86341   | 1.1119636  | 9.992093  | 1.0646828  | 9.929407  | 1.3058473 | 10.223969  | Vapa          | NM_013933    | Vapa            |
| 1423829_at     | 0.9767263  | 7.6758776 | 0.99239814 | 7.6988425 | 0.95030767 | 7.636318  | 1.3057451 | 8.094725   | 0910001A06Rik | NM_144846    | 0910001A06Rik   |
| 1422186_s_at   | 0.96869844 | 8.257159  | 0.93448985 | 8.20529   | 1.0579783  | 8.384349  | 1.3050097 | 8.687099   | Cyb5r3        | NM_029787    | Cyb5r3          |
| 1417130_s_at   | 0.84603053 | 6.120726  | 0.72128195 | 5.890579  | 0.74059135 | 5.928694  | 1.3043205 | 6.7452426  | Anpptl4       | NM_020581    | Anpptl4         |
| 1420855_at     | 0.91918963 | 6.326727  | 0.86569786 | 6.240228  | 1.0212722  | 6.47866   | 1.3037084 | 6.830914   | Eln           | NM_007925    | Eln             |
| 1451854_a_at   | 0.9772373  | 7.2925863 | 0.9617432  | 7.269529  | 1.0699909  | 7.4234037 | 1.3008823 | 7.7052956  | Shrm          | NM_015756    | Shrm            |
| 1444786_at     | 0.98972183 | 6.069144  | 0.9464559  | 6.0046563 | 0.9391594  | 5.9934907 | 1.3008173 | 6.463467   | Nol3          | NM_030152    | Nol3            |
| 1415778_at     | 0.9765779  | 9.46043   | 1.0433165  | 9.5557995 | 0.90850824 | 9.356195  | 1.2990409 | 9.87207    | Morf4l2       | NM_019768    | Morf4l2         |
| 1452250_a_at   | 0.9665995  | 9.656879  | 0.8122093  | 9.405813  | 1.0793229  | 9.816016  | 1.2987641 | 10.083029  | Col6a2        | NM_146007    | Col6a2          |
| 1437150_at     | 1.0498939  | 5.673691  | 0.948725   | 5.5275087 | 1.1757784  | 5.837064  | 1.2986487 | 5.9804583  | 1700012H17Rik | NM_173426    | 1700012H17Rik   |
| 1434998_at     | 1.0083212  | 8.191752  | 0.9516176  | 8.108252  | 1.0826912  | 8.294418  | 1.2981812 | 8.556289   | Iqgap1        | NM_016721    | Iqgap1          |
| 1450890_a_at   | 0.97548777 | 7.1925135 | 0.93492615 | 7.131242  | 0.9127068  | 7.096541  | 1.2980154 | 7.6046247  | Abi1          | NM_007380    | Abi1            |
| 1448057_at     | 0.9667215  | 6.566339  | 1.0968982  | 6.748596  | 1.1431082  | 6.808129  | 1.2966545 | 6.9899607  | ---           | BI320076     | ---             |

|              |            |            |            |           |            |           |           |                         |              |                 |
|--------------|------------|------------|------------|-----------|------------|-----------|-----------|-------------------------|--------------|-----------------|
| 1449580_s_at | 0.95832074 | 5.770723   | 0.925488   | 5.7204285 | 1.0800157  | 5.943195  | 1.2777098 | 6.185703 H2-DMB1        | NM_010387    | H2-DMB1 /// H2- |
| 1417659_at   | 1.0203457  | 8.814598   | 1.0075537  | 8.796396  | 1.0501127  | 8.856084  | 1.2768239 | 9.138099 Vps29          | NM_019780    | Vps29           |
| 1429282_at   | 1.0199218  | 6.546854   | 1.0103667  | 6.5332747 | 1.0705177  | 6.616704  | 1.2737652 | 6.867495 Thap1          | NM_199042    | Thap1           |
| 1434096_at   | 0.94061065 | 7.6457934  | 0.87506396 | 7.541584  | 0.94838476 | 7.657668  | 1.2730747 | 8.08244 Slc4a4          | NM_187660    | Slc4a4          |
| 1452783_at   | 0.9654715  | 7.7874174  | 0.9989427  | 7.836586  | 0.9665809  | 7.789074  | 1.2715309 | 8.184679 Fndc3b         | NM_173182    | Fndc3b          |
| 1436016_x_at | 1.01759    | 10.662569  | 1.0935198  | 10.766393 | 1.0743018  | 10.740812 | 1.270995  | 10.983371 Gdl2          | NM_008112    | Gdl2            |
| 1425896_a_at | 0.9016526  | 7.849657   | 0.7395142  | 7.5636625 | 0.98022354 | 7.970196  | 1.2706138 | 8.344538 Fbn1           | NM_007993    | Fbn1            |
| 1416359_at   | 0.9762643  | 7.094637   | 0.99799144 | 7.1263924 | 1.0886861  | 7.251881  | 1.2695634 | 7.473625 Snag1          | NM_130796    | Snag1           |
| 1416257_at   | 0.990211   | 7.7821536  | 0.98411036 | 7.7732377 | 0.99302566 | 7.786248  | 1.2682716 | 8.13921 Capn2           | NM_009794    | Capn2           |
| 1442145_at   | 0.97822297 | 5.743915   | 1.0892758  | 5.8990493 | 1.1244866  | 5.9449463 | 1.2681019 | 6.1183505 Gm542         | XM_148700    | Atp13a3         |
| 1453128_at   | 1.0050303  | 6.533592   | 1.0480574  | 6.5940714 | 0.9279493  | 6.4184713 | 1.2662698 | 6.8669386 Xlkd1         | NM_053247    | Xlkd1           |
| 1436431_at   | 0.9728224  | 7.2986174  | 0.91452765 | 7.2094674 | 0.8971049  | 7.181717  | 1.2645341 | 7.6769743 1700025G04Rik | NM_197990    | 1700025G04Rik   |
| 1427475_a_at | 0.9220985  | 7.1218863  | 0.84979725 | 7.004084  | 0.9347616  | 7.141564  | 1.2634006 | 7.5762057 Nrap          | NM_008733    | ---             |
| 1419640_at   | 1.0071927  | 7.6990848  | 1.0632262  | 7.7771935 | 1.0759274  | 7.7943254 | 1.260161  | 8.022353 Purb           | NM_011221    | Purb            |
| 1418102_at   | 1.0217742  | 7.1215343  | 0.92974746 | 6.9853687 | 1.141713   | 7.2816577 | 1.260048  | 7.423937 Hes1           | NM_008235    | Hes1            |
| 1421817_at   | 1.00249    | 6.7131066  | 1.115097   | 6.8666873 | 1.1216868  | 6.875188  | 1.2593607 | 7.0422096 Gsr           | NM_010344    | Gsr             |
| 1423953_at   | 1.0323168  | 7.256349   | 1.116698   | 7.3697023 | 1.1483097  | 7.409975  | 1.2590144 | 7.542758 Cdkal1         | NM_144536    | Cdkal1          |
| 1426947_x_at | 0.958471   | 8.580268   | 0.82875687 | 8.3704815 | 1.0357991  | 8.692204  | 1.2558771 | 8.970156 Col6a2         | NM_146007    | Col6a2          |
| 1427881_at   | 0.9800469  | 7.0403943  | 0.90957433 | 6.9327345 | 1.0111917  | 7.085528  | 1.2554488 | 7.3976746 4930588M11Rik | NM_153806    | 4930588M11Rik   |
| 1438245_at   | 0.87943876 | 7.156274   | 1.0887506  | 7.4642925 | 0.94606054 | 7.2616234 | 1.2523482 | 7.6678667 Nfb           | AI037029     | ---             |
| 1416004_at   | 1.0026461  | 9.13324    | 1.0403683  | 9.186522  | 1.0450151  | 9.192951  | 1.2536482 | 9.455561 Ywhah          | NM_011738    | Ywhah /// LOC54 |
| 1424635_at   | 0.98721534 | 12.2111845 | 0.9919274  | 12.218054 | 1.0954224  | 12.361235 | 1.2530963 | 12.555245 Eef1a1        | NM_053247    | Eef1a1          |
| 1416226_at   | 0.9791941  | 7.983564   | 0.84257513 | 7.766774  | 0.9020177  | 7.865125  | 1.251408  | 8.33745 Arpc1b          | NM_023142    | Arpc1b          |
| 1428311_at   | 0.94885236 | 7.36237    | 1.0039318  | 7.4437757 | 0.99744606 | 7.4344254 | 1.2489026 | 7.758775 2810012H18Rik  | BU509974     | 2810012H18Rik   |
| 1418764_a_at | 1.0183434  | 6.751413   | 1.0779256  | 6.8334465 | 1.0846274  | 6.842388  | 1.2487766 | 7.0457044 Bpnt1         | NM_011794    | Bpnt1           |
| 1415906_at   | 0.9878397  | 11.8562155 | 0.9617646  | 11.817623 | 1.004884   | 11.880896 | 1.2479129 | 12.193384 Tmsb4x        | NM_021278    | Tmsb4x          |
| 1417380_at   | 0.962169   | 7.998316   | 0.90067536 | 7.903033  | 1.0268795  | 8.09222   | 1.2460816 | 8.371352 Iqgap1         | NM_101621    | Iqgap1          |
| 1434928_at   | 0.98871744 | 6.7799816  | 1.0130471  | 6.8150525 | 1.1158476  | 6.9544916 | 1.2458042 | 7.1134286 Gas2l1        | NM_030228    | Gas2l1          |
| 1457260_at   | 1.004194   | 6.4057565  | 0.92385113 | 6.2854505 | 1.0577476  | 6.480714  | 1.2450836 | 6.7159615 7530403E16Rik | AK077438     | ---             |
| 1453724_a_at | 0.9961927  | 7.6979265  | 0.9404146  | 7.6147985 | 1.1645578  | 7.923212  | 1.2449634 | 8.019533 Serpinf1       | NM_011340    | Serpinf1        |
| 1422791_at   | 1.0100021  | 6.3676243  | 1.0746282  | 6.4571037 | 1.0320716  | 6.398809  | 1.2426548 | 6.6666913 Pafah1b2      | NM_007875    | Pafah1b2        |
| 1426379_at   | 1.027208   | 8.607588   | 1.0640849  | 8.658472  | 1.1278105  | 8.742384  | 1.2424407 | 8.882036 Eif4b          | NM_145625    | Eif4b           |
| 1453283_at   | 1.0057111  | 6.2485504  | 0.984782   | 6.2182107 | 1.0475     | 6.307285  | 1.2415859 | 6.552518 Pgm1           | NM_025700    | Pgm1            |
| 1416165_at   | 0.9583938  | 6.69988    | 0.9704414  | 6.717902  | 1.0897083  | 6.885131  | 1.2397486 | 7.071237 Rab31          | NM_133685    | Rab31           |
| 1422823_at   | 0.9738797  | 5.7718754  | 0.8970638  | 5.6533422 | 1.0309772  | 5.8540726 | 1.2395542 | 6.119881 Eps8           | NM_007945    | Eps8            |
| 1422688_a_at | 1.0237237  | 6.3969164  | 0.9945343  | 6.355183  | 1.0979012  | 6.4978385 | 1.2372075 | 6.670178 Nras           | NM_010937    | Nras            |
| 1418099_at   | 0.9601758  | 6.1682854  | 0.9716127  | 6.185368  | 1.098913   | 6.3629923 | 1.2360203 | 6.5326176 Tnfrsf1b      | NM_011610    | Tnfrsf1b        |
| 1451494_at   | 0.9684853  | 7.716023   | 1.057461   | 7.716023  | 1.0019068  | 7.769098  | 1.2359567 | 8.07327 Wac             | NM_153085    | Wac             |
| 1416241_at   | 1.0152044  | 8.4582815  | 1.071316   | 8.535894  | 1.1175376  | 8.596834  | 1.2358537 | 8.74202 Sec13l1         | NM_024206    | Sec13l1         |
| 1422764_at   | 1.0028696  | 8.731022   | 0.952445   | 8.656596  | 1.0382166  | 8.780095  | 1.2357997 | 9.032333 Mapr1          | NM_007896    | Mapr1           |
| 1454641_at   | 0.99323463 | 8.5143795  | 1.0563958  | 8.603324  | 0.9711276  | 8.481907  | 1.2356284 | 8.829418 Cggbp1         | NM_178647    | Cggbp1          |
| 1416461_at   | 0.97111535 | 9.172516   | 0.9919475  | 9.203136  | 0.8809245  | 9.318192  | 1.2355589 | 9.519965 Gpiap1         | NM_016739    | Gpiap1          |
| 1460208_at   | 0.89177924 | 8.219979   | 0.6716771  | 7.8110595 | 0.8852011  | 8.209297  | 1.2355578 | 8.690383 Fbn1           | NM_007993    | Fbn1            |
| 1451318_a_at | 0.9867261  | 7.4585905  | 1.0095055  | 7.4915175 | 1.0476581  | 7.5450373 | 1.2351253 | 7.7825265 Lyn           | NM_010747    | Lyn             |
| 1451120_at   | 1.0170866  | 8.068621   | 0.9632205  | 7.9901166 | 1.0314521  | 8.088856  | 1.2344317 | 8.348025 Rpo1-3         | NM_181730    | Rpo1-3          |
| 1448590_at   | 0.9367079  | 8.7140875  | 0.81439614 | 8.512218  | 1.0614434  | 8.894444  | 1.233214  | 9.11084 Col6a1          | NM_009933    | Col6a1          |
| 1417071_s_at | 1.0123671  | 5.871618   | 1.0287312  | 5.894275  | 1.1434144  | 6.047233  | 1.2324167 | 6.1553755 Cyp4v3        | NM_133969    | Cyp4v3          |
| 1455827_at   | 0.9576993  | 10.073155  | 0.9725355  | 10.095333 | 0.905605   | 9.992465  | 1.2320691 | 10.436593 Mbnl2         | NM_175341    | Mbnl2           |
| 1417744_a_at | 0.996917   | 7.281797   | 1.0323241  | 7.3321476 | 0.9833733  | 7.2620625 | 1.2313434 | 7.586485 Ralb           | NM_022327    | Ralb            |
| 1426397_at   | 0.97426814 | 8.36879    | 0.94733465 | 8.328345  | 1.0675925  | 8.500759  | 1.2304795 | 8.705619 Tgfb2          | NM_009371    | Tgfb2           |
| 1417893_at   | 0.98137707 | 6.0424175  | 0.97744554 | 6.0366263 | 1.1213967  | 6.2348347 | 1.2298563 | 6.3680277 Sfxn3         | NM_053197    | Sfxn3           |
| 1436954_at   | 0.9610407  | 7.105419   | 0.9554226  | 7.096961  | 1.0477046  | 7.2299814 | 1.2298272 | 7.4612055 Waspip        | NM_153138    | Waspip          |
| 1424134_at   | 0.97793514 | 6.6946373  | 1.0450525  | 6.790402  | 1.0456814  | 6.79127   | 1.2295069 | 7.024906 4930470D19Rik  | NM_026274    | 4930470D19Rik   |
| 1417291_at   | 0.98804116 | 8.033758   | 0.98737115 | 8.03278   | 1.0680267  | 8.146064  | 1.2291416 | 8.348766 Tnfrsf1a       | NM_011609    | Tnfrsf1a        |
| 1426378_at   | 1.0056133  | 8.840275   | 1.0701228  | 8.9299755 | 1.0884243  | 8.95444   | 1.2288188 | 9.129472 Eif4b          | NM_145625    | Eif4b           |
| 1422738_at   | 0.9901207  | 6.659249   | 0.9552587  | 6.6075354 | 1.0193582  | 6.7012334 | 1.2281781 | 6.970092 Ddr2           | NM_022563    | Ddr2            |
| 1448918_at   | 0.96305555 | 7.8884416  | 1.101818   | 8.082636  | 0.99937344 | 7.9418464 | 1.2254049 | 8.236009 Sloc3a1        | NM_023908    | Sloc3a1         |
| 1427882_at   | 0.988453   | 6.0839214  | 0.88542557 | 5.9251194 | 0.96356916 | 6.047137  | 1.2253695 | 6.3938937 4930588M11Rik | NM_153806    | 4930588M11Rik   |
| 1451353_at   | 0.93900776 | 5.781066   | 0.8949205  | 5.711689  | 0.87185717 | 5.674021  | 1.2224232 | 6.161601 Tm6sf1         | NM_145375    | Tm6sf1          |
| 1458897_at   | 0.98536503 | 6.1322956  | 1.0314869  | 6.198291  | 1.1319425  | 6.3323665 | 1.2222097 | 6.4430575 Ust           | NM_177387    | Ust             |
| 1447917_x_at | 1.0134414  | 8.466654   | 0.9700462  | 8.403518  | 1.0922613  | 8.57471   | 1.2194289 | 8.733598 Ntan1          | NM_010946    | Ntan1           |
| 1415975_at   | 0.9790598  | 7.0518823  | 0.9686887  | 7.036519  | 0.93171066 | 6.9803677 | 1.2193139 | 7.3684835 Carhsp1       | NM_025821    | Carhsp1         |
| 1428423_at   | 0.9954482  | 8.072409   | 1.0739895  | 8.181972  | 1.1229521  | 8.246287  | 1.2193108 | 8.365057 Pcgf3          | NM_172716    | Pcgf3           |
| 1449323_a_at | 1.0288354  | 11.406637  | 1.0555594  | 11.443633 | 0.9987545  | 11.363828 | 1.2189287 | 11.651239 Rpl3          | NM_013762    | Rpl3            |
| 1460700_at   | 0.9534754  | 8.884649   | 0.9175776  | 8.829283  | 1.0478737  | 9.020845  | 1.2185912 | 9.238595 Stat3          | NM_011486    | Stat3           |
| 1434537_at   | 0.9984151  | 8.086131   | 1.0668943  | 8.181836  | 1.1143967  | 8.244682  | 1.2182541 | 8.373234 Sloc3a1        | NM_023908    | Sloc3a1         |
| 1426812_a_at | 0.9646624  | 7.330786   | 1.0039062  | 7.3883142 | 0.9571502  | 7.3195076 | 1.2167722 | 7.6657486 9130404D14Rik | NM_146119    | 9130404D14Rik   |
| 1417099_at   | 1.0294654  | 7.198374   | 1.0613546  | 7.2423854 | 1.1452967  | 7.3521996 | 1.214247  | 7.4365406 Ftsj1         | NM_133991    | Ftsj1           |
| 1450740_a_at | 0.979057   | 9.487385   | 0.9182531  | 9.394884  | 1.0409837  | 9.575868  | 1.2109793 | 9.794093 Mapr1          | NM_007896    | Mapr1           |
| 1425099_a_at | 0.89220613 | 5.5495954  | 0.7789558  | 5.35376   | 0.92030627 | 5.5943327 | 1.2103889 | 5.989617 Arntl          | NM_007489    | Arntl           |
| 1427889_at   | 0.9734926  | 8.940889   | 0.95064086 | 8.90662   | 1.0160806  | 9.002663  | 1.2095567 | 9.254126 Spna2          | XM_207079    | Spna2           |
| 1450887_at   | 0.98553824 | 6.0520525  | 0.9705628  | 6.029962  | 1.0642391  | 6.162891  | 1.2087063 | 6.346533 Rqcd1          | NM_021383    | Rqcd1           |
| 1454626_at   | 0.9752446  | 9.764249   | 0.91930777 | 9.679033  | 0.92588264 | 9.689314  | 1.2077713 | 10.072761 Cltc          | NM_001003908 | Cltc            |
| 1455697_at   | 0.9838711  | 6.6339293  | 1.0517365  | 6.7301667 | 1.0990425  | 6.793635  | 1.2077317 | 6.9296875 E130113E03Rik | XM_127791    | E130113E03Rik   |
| 1417272_at   | 0.9622682  | 6.4576554  | 0.84490913 | 6.270013  | 0.9335686  | 6.413973  | 1.2070078 | 6.7845793 9130005N14Rik | NM_026667    | 9130005N14Rik   |
| 1418244_at   | 1.0286098  | 9.265177   | 1.0083297  | 9.236448  | 1.0988855  | 9.360523  | 1.2060989 | 9.494829 Nat5           | NM_026425    | Nat5            |
| 1428327_at   | 0.9509826  | 8.067302   | 0.98282444 | 8.114817  | 1.0577439  | 8.220802  | 1.2058488 | 8.40986 2310001H13Rik   | NM_175114    | 2310001H13Rik   |
| 1448435_at   | 0.98144203 | 6.9176     | 1.021903   | 6.9758835 | 1.1135435  | 7.099783  | 1.2054145 | 7.2141542 Pcaqap        | NM_033609    | Pcaqap          |

|              |            |            |            |           |            |            |            |           |               |              |               |
|--------------|------------|------------|------------|-----------|------------|------------|------------|-----------|---------------|--------------|---------------|
| 1452478_at   | 0.9154186  | 9.190031   | 0.99371105 | 9.308426  | 1.0324639  | 9.36362    | 1.175494   | 9.550795  | Alpk2         | XM_128981    | Alpk2         |
| 1423383_a_at | 0.97042894 | 8.957378   | 0.89092636 | 8.834063  | 0.95348793 | 8.93197    | 1.1754513  | 9.233898  | Osbp19        | NM_133885    | Osbp19        |
| 1418365_at   | 1.0319558  | 7.289391   | 0.9450817  | 7.162521  | 1.1942219  | 7.500081   | 1.1742951  | 7.475805  | Ctsh          | NM_007801    | Ctsh          |
| 1416329_at   | 0.97560805 | 8.583005   | 0.94570076 | 8.538087  | 1.0608345  | 8.703831   | 1.1734806  | 8.849426  | Cyfp1         | NM_011370    | Cyfp1         |
| 1416589_at   | 0.9588814  | 11.088867  | 0.886903   | 10.976292 | 0.9825653  | 11.124068  | 1.1734455  | 11.380195 | Sparc         | NM_009242    | Sparc         |
| 1445888_x_at | 1.0048876  | 7.2431536  | 0.9824399  | 7.210561  | 1.1188114  | 7.3980865  | 1.1697998  | 7.4623814 | Parp3         | NM_145619    | Parp3         |
| 1454899_at   | 0.9734497  | 7.252619   | 0.9037282  | 7.199766  | 0.8440112  | 7.1011395  | 1.1687967  | 7.57083   | Lpp           | NM_178665    | Lpp           |
| 1436958_x_at | 1.0083663  | 6.930427   | 0.9711303  | 6.876144  | 1.045551   | 6.9826703  | 1.1683257  | 7.14285   | Tpm3          | NM_022314    | Tpm3          |
| 1435091_at   | 0.96704435 | 8.149727   | 1.0587075  | 8.2803755 | 0.9313931  | 8.095535   | 1.1657304  | 8.419307  | C80731        | NM_145503    | C80731        |
| 1423818_a_at | 0.9958049  | 7.9078765  | 0.9907795  | 7.900578  | 0.9367624  | 7.819697   | 1.1652294  | 8.134556  | Ar16p1        | NM_019419    | Ar16p1        |
| 1426642_at   | 0.93833    | 7.6190543  | 0.8399897  | 7.4593306 | 0.8793367  | 7.525375   | 1.1641049  | 7.9301085 | Fn1           | NM_010233    | Fn1           |
| 1423768_at   | 1.0043285  | 6.8111815  | 1.0061876  | 6.8138494 | 1.0701416  | 6.9027524  | 1.1598998  | 7.018951  | Unc93b1       | NM_019449    | Unc93b1       |
| 1426425_at   | 1.0268376  | 9.26982    | 1.0442089  | 9.294022  | 1.0876061  | 9.352768   | 1.1585907  | 9.443983  | Sugt1         | NM_026474    | Sugt1         |
| 1426750_at   | 0.93261856 | 6.5899954  | 0.97067875 | 6.6477017 | 0.92806053 | 6.5829268  | 1.1567392  | 6.9006996 | Flnb          | XM_127565    | Flnb          |
| 1454757_s_at | 0.95652103 | 8.191608   | 0.98895895 | 8.239721  | 1.076981   | 8.362733   | 1.1565269  | 8.465538  | D12ErtD647e   | NM_026790    | D12ErtD647e   |
| 1425550_a_at | 0.98730916 | 10.506899  | 0.90648395 | 10.383678 | 0.90371376 | 10.379263  | 1.1519922  | 10.729456 | Prkar1a       | NM_021880    | Prkar1a       |
| 1417660_s_at | 1.0345535  | 9.990025   | 0.94484574 | 9.859168  | 0.99608845 | 9.935363   | 1.1478176  | 10.139911 | Vps29         | NM_019780    | Vps29         |
| 1421917_at   | 0.9511495  | 8.273537   | 0.87902343 | 8.1951765 | 1.0611493  | 8.491366   | 1.1467222  | 8.543309  | Pdgfra        | NM_011058    | Pdgfra        |
| 1460688_s_at | 0.9391925  | 6.3321586  | 1.0178716  | 6.4482217 | 1.0190178  | 6.4498453  | 1.1457585  | 6.618969  | AA07659       | NM_175352    | AA07659       |
| 1426792_a_at | 0.9797356  | 7.301162   | 0.98032016 | 7.3020225 | 0.97087467 | 7.288054   | 1.1438222  | 7.52456   | Ppp1r15b      | NM_133819    | Ppp1r15b      |
| 1448305_at   | 0.99873626 | 9.4627075  | 0.9950976  | 9.457442  | 0.94894016 | 9.388922   | 1.1410416  | 9.654883  | Rab6          | NM_024287    | Rab6          |
| 1460173_at   | 0.94761133 | 7.4200354  | 0.9193898  | 7.3764167 | 0.99947965 | 7.4969172  | 1.1409374  | 7.687888  | Lasp1         | NM_010688    | Lasp1         |
| 1417889_at   | 1.0302513  | 11.029968  | 1.0244666  | 11.021845 | 1.1001295  | 11.124644  | 1.1401067  | 11.17614  | Apobec2       | NM_009694    | Apobec2       |
| 1448316_at   | 0.9813872  | 7.324256   | 0.8878866  | 7.1798086 | 0.90903693 | 7.2137723  | 1.139005   | 7.5391355 | Klifs3        | NM_024217    | Klifs3        |
| 1455333_at   | 0.950643   | 7.4274187  | 0.9714469  | 7.4586506 | 1.0420693  | 7.5598946  | 1.1362796  | 7.6847615 | Tns3          | XM_109868    | Tns3          |
| 1448950_at   | 0.9757707  | 6.7743764  | 1.0021433  | 6.812851  | 0.9423255  | 6.7240596  | 1.1362665  | 6.9940634 | Il1r1         | NM_008362    | Il1r1         |
| 1423791_at   | 0.9826876  | 8.326876   | 0.9409571  | 8.235919  | 1.012228   | 8.341246   | 1.1333084  | 8.504251  | Ik            | NM_011879    | Ik            |
| 1416812_at   | 0.991513   | 6.7829924  | 0.95429575 | 6.7277975 | 0.90662724 | 6.6538706  | 1.1325586  | 6.974875  | Tia1          | NM_011585    | Tia1          |
| 1448526_at   | 0.98392653 | 7.857828   | 0.96125436 | 7.824196  | 0.9913705  | 7.868702   | 1.1279979  | 8.05497   | Kpnb1         | NM_008379    | Kpnb1         |
| 1452113_a_at | 0.9654575  | 6.024133   | 0.87941676 | 5.8894677 | 0.9078118  | 5.9353137  | 1.1272398  | 6.247643  | Rab23         | NM_008999    | Rab23         |
| 1424572_a_at | 1.0010309  | 7.8363028  | 1.0112386  | 7.8509398 | 1.0749562  | 7.939094   | 1.1272264  | 8.007594  | H2afy         | NM_012015    | H2afy         |
| 1434479_at   | 0.9151041  | 6.6644316  | 0.77534235 | 6.425329  | 0.9084621  | 6.653922   | 1.1233507  | 6.9602327 | AI413331      | NM_015734    | AI413331      |
| 1433833_at   | 0.9411341  | 8.365874   | 0.91145957 | 8.319653  | 0.7736443  | 8.083145   | 1.1217036  | 8.619094  | Fndc3b        | NM_017318    | Fndc3b        |
| 1448957_at   | 0.97845185 | 7.1039934  | 0.894126   | 6.973971  | 0.94877    | 7.0595512  | 1.1214541  | 7.3007917 | Rbpsub        | NM_009035    | Rbpsub        |
| 1420394_s_at | 0.88841957 | 6.4351254  | 0.7580924  | 6.206258  | 0.6863634  | 6.0628567  | 1.1207172  | 6.7702346 | Gp49a         | NM_008147    | Gp49a         |
| 1433627_at   | 0.9931866  | 7.4825826  | 1.0652604  | 7.5836525 | 0.952638   | 7.422446   | 1.1155113  | 7.6501513 | Sec23ip       | NM_001029982 | Sec23ip       |
| AFX-GapdhMur | 1.00197    | 13.128968  | 1.0001506  | 13.126346 | 1.071209   | 13.2253685 | 1.1150964  | 13.283297 | LOC14433      | NM_001001303 | LOC14433      |
| 1422623_x_at | 1.0082283  | 11.781137  | 0.99047333 | 11.755506 | 1.0526044  | 11.843279  | 1.1083511  | 11.91773  | Rpl41         | NM_018860    | Rpl41         |
| 1423077_at   | 0.98656327 | 7.578877   | 0.9329901  | 7.4983273 | 1.0228289  | 7.6309586  | 1.1065947  | 7.74452   | Snx9          | NM_025664    | Snx9          |
| 1427368_x_at | 0.97344214 | 6.626032   | 0.9382664  | 6.572934  | 0.968019   | 6.617972   | 1.0964013  | 6.7976413 | Fes           | NM_010194    | Fes           |
| AFX-MURINE_B | 0.9746547  | 12.8089905 | 1.0174788  | 12.871026 | 1.0096264  | 12.859849  | 1.0947064  | 12.976571 | Adsl          | NM_001004436 | Adsl          |
| 1417762_a_at | 1.0282909  | 11.129589  | 1.063215   | 11.177774 | 1.0011975  | 11.091067  | 0.9584112  | 11.028057 | Rpl8          | NM_012053    | Rpl8          |
| 1448322_a_at | 1.0005395  | 13.249271  | 1.0115323  | 13.265035 | 1.0069604  | 13.258499  | 0.9559117  | 13.183442 | Cox41         | NM_009941    | Cox41         |
| 1418370_at   | 1.0044425  | 13.013261  | 0.97285426 | 12.967163 | 0.9837726  | 12.983263  | 0.93977    | 12.917246 | Tnnc1         | NM_009393    | Tnnc1         |
| 1437246_x_at | 1.0236827  | 9.036731   | 1.0660411  | 9.095224  | 1.0667263  | 9.096151   | 0.9392008  | 8.912467  | Rps6          | NM_009096    | Rps6          |
| 1434516_at   | 1.0588789  | 8.204629   | 1.0243294  | 8.156672  | 1.0857383  | 8.2407675  | 0.9386763  | 8.030791  | Pstk          | NM_177609    | Pstk          |
| 1424786_s_at | 1.0444098  | 8.021711   | 1.134042   | 8.104096  | 1.1146529  | 8.115617   | 0.9347532  | 7.8616805 | Wdr45         | NM_017237    | Wdr45         |
| 1423676_at   | 1.004349   | 12.852413  | 0.99519837 | 12.839209 | 0.9883853  | 12.829297  | 0.92216957 | 12.729256 | Atp5h         | NM_027862    | Atp5h         |
| 1416420_a_at | 1.0308813  | 12.086889  | 1.04414    | 12.105327 | 0.9695199  | 11.998354  | 0.9198859  | 11.922538 | Rpl9          | NM_011292    | Rpl9          |
| 1418389_at   | 1.0342032  | 7.173679   | 1.1273308  | 7.2980704 | 1.1045907  | 7.268671   | 0.91782755 | 7.0014544 | 2810453106Rik | NM_026050    | 2810453106Rik |
| 1452923_at   | 1.0292163  | 7.952485   | 1.1040157  | 8.0536995 | 1.0552828  | 7.988568   | 0.9176152  | 7.7869    | 1810058114Rik | NM_484315    | 1810058114Rik |
| 1435151_a_at | 1.029115   | 11.8337145 | 1.0265177  | 11.830069 | 0.98535746 | 11.771029  | 0.90769106 | 11.652584 | Rps3          | NM_012052    | Rps3          |
| 1417354_at   | 1.0408372  | 7.232058   | 1.1176167  | 7.334739  | 1.0481206  | 7.2421184  | 0.9069555  | 7.033417  | Si11          | NM_030749    | Si11          |
| 1443843_x_at | 1.0169766  | 12.369319  | 1.047303   | 12.411712 | 0.9996423  | 12.344517  | 0.89934295 | 12.191976 | Rpl9          | NM_011292    | Rpl9          |
| 1434499_a_at | 1.0167642  | 12.468069  | 0.97424847 | 12.406446 | 0.9852071  | 12.422583  | 0.8969485  | 12.287182 | Ldh2          | NM_008492    | Ldh2          |
| 1448849_at   | 1.0352181  | 9.006242   | 1.0030128  | 8.960647  | 1.0024037  | 8.95977    | 0.8911476  | 8.790044  | Mrpl40        | NM_010922    | Mrpl40        |
| 1438199_at   | 1.0548762  | 8.951901   | 1.0898533  | 8.998962  | 1.140515   | 9.064514   | 0.8908302  | 8.708051  | AI316807      | NM_001012667 | AI316807      |
| 1451209_at   | 1.0181042  | 7.9290743  | 0.96907073 | 7.8578625 | 0.9974537  | 7.8995104  | 0.8867672  | 7.729816  | Lass5         | NM_028015    | Lass5         |
| 1428003_s_at | 0.99877876 | 6.3559885  | 0.99831754 | 6.355323  | 0.9806864  | 6.3296156  | 0.8847495  | 6.1810923 | Thtpa         | NM_153083    | Thtpa         |
| 1418331_at   | 1.0437235  | 7.979802   | 1.0260717  | 7.9551945 | 1.0703102  | 8.016092   | 0.88385665 | 7.7399473 | 1110031102Rik | NM_025402    | 1110031102Rik |
| 1428619_at   | 1.0175024  | 10.304421  | 1.0892735  | 10.402756 | 0.9495052  | 10.204637  | 0.88173664 | 10.097809 | 2310005N03Rik | NM_025511    | 2310005N03Rik |
| 1420346_at   | 1.0216573  | 6.853045   | 1.122053   | 6.9882746 | 1.0721935  | 6.922699   | 0.87978303 | 6.637354  | Asb12         | NM_080858    | Asb12         |
| 1423513_at   | 1.0050642  | 7.5994787  | 1.0596775  | 7.6758165 | 0.9925188  | 7.611357   | 0.87798643 | 7.404462  | Neo1          | NM_008684    | Neo1          |
| 1416616_s_at | 1.0632613  | 8.455912   | 0.98115724 | 8.3399725 | 1.0377499  | 8.420875   | 0.8772252  | 8.178435  | Cipp          | NM_017393    | Cipp          |
| 1448292_at   | 1.0119371  | 12.118406  | 0.95349914 | 12.032589 | 0.9492543  | 12.026153  | 0.87700737 | 11.911946 | Uqcr          | NM_025650    | Uqcr          |
| 1448539_a_at | 1.0375513  | 7.154022   | 1.0021569  | 7.103948  | 1.1513093  | 7.304115   | 0.8769634  | 6.9114275 | Acy3          | NM_027857    | Acy3          |
| 1420058_s_at | 1.027281   | 9.528494   | 0.9828814  | 9.464753  | 0.94917464 | 9.414441   | 0.87532324 | 9.29755   | 2410166105Rik | NM_029759    | 2410166105Rik |
| 1422468_at   | 1.0439628  | 8.494887   | 0.9790513  | 8.402274  | 0.94076085 | 8.344717   | 0.87381524 | 8.238217  | Ppt1          | NM_008917    | Ppt1          |
| 1423769_at   | 1.0246135  | 8.787554   | 0.9706375  | 8.709478  | 0.94533736 | 8.671375   | 0.87321824 | 8.556888  | Ptcd2         | NM_026873    | Ptcd2         |
| 1417164_at   | 1.0199463  | 6.4555354  | 0.94614995 | 6.3471828 | 1.1184323  | 6.5885205  | 0.8723741  | 6.230061  | Tcea10        | NM_022019    | Dusp10        |
| 1424531_a_at | 1.0370123  | 8.543261   | 1.0373174  | 8.543685  | 1.1435758  | 8.68438    | 0.86997545 | 8.289874  | Tcep3         | NM_011542    | Tcep3         |
| 1428709_a_at | 1.0221092  | 9.766929   | 0.9779182  | 9.703164  | 0.9944361  | 9.72733    | 0.8690306  | 9.532859  | Mrpl24        | NM_026591    | Mrpl24        |
| 1429248_at   | 1.0325532  | 8.80407    | 1.0136429  | 8.777404  | 1.0454994  | 8.822046   | 0.86798865 | 8.553602  | 2810002N01Rik | NM_026511    | 2810002N01Rik |
| 1451370_at   | 1.0465492  | 7.426061   | 1.2560661  | 7.6893334 | 1.165233   | 7.5810394  | 0.8675384  | 7.1554203 | ---           | AI530630     | ---           |
| 1428621_a_at | 1.0438699  | 8.888719   | 0.95692325 | 8.763251  | 0.9726052  | 8.786703   | 0.8663746  | 8.61984   | Vps25         | NM_026776    | Vps25         |
| 1449441_a_at | 1.0130787  | 8.593536   | 1.0015345  | 8.577005  | 1.050134   | 8.645365   | 0.86612743 | 8.367441  | Wbp1          | NM_016757    | Wbp1          |
| 1424122_s_at | 1.034964   | 9.369303   | 0.9780213  | 9.287661  | 0.9991846  | 9.318545   | 0.86563796 | 9.11558   | Commd1        | NM_144514    | Commd1        |
| 1429243_at   | 1.0164102  | 6.2512026  | 0.9394035  | 6.1291627 | 1.0116088  | 6.244372   |            |           |               |              |               |

|              |            |           |            |           |            |           |            |           |               |              |                 |
|--------------|------------|-----------|------------|-----------|------------|-----------|------------|-----------|---------------|--------------|-----------------|
| 1437193_s_at | 1.0322207  | 10.198913 | 1.0042644  | 10.1593   | 1.0098661  | 10.167326 | 0.8492185  | 9.91737   | Snrpb         | NM_009225    | Snrpb           |
| 1416495_s_at | 0.99904686 | 11.059864 | 0.9766897  | 11.027211 | 0.96632063 | 11.011813 | 0.8485164  | 10.824254 | Ndufs5        | NM_001030274 | Ndufs5          |
| 1448835_at   | 1.0111116  | 9.40807   | 0.9374395  | 9.298926  | 0.9123025  | 9.259712  | 0.84786046 | 9.154027  | E2f6          | NM_033270    | E2f6            |
| 1437133_x_at | 1.0252697  | 11.244921 | 0.93467337 | 11.111452 | 1.0171891  | 11.233506 | 0.84658223 | 10.96864  | Akr1b3        | NM_009658    | Akr1b3 /// LOC4 |
| 1430990_s_at | 1.0256677  | 8.202599  | 0.9492721  | 8.090931  | 0.9751192  | 8.129687  | 0.84628403 | 7.9252505 | Mrpl44        | XM_357108    | Mrpl44          |
| 1452621_at   | 1.0354922  | 8.538069  | 0.9509873  | 8.415251  | 0.94220865 | 8.401871  | 0.84591836 | 8.246343  | Pcbd2         | NM_028281    | Pcbd2           |
| 1454137_s_at | 0.9914667  | 10.045144 | 1.1200869  | 10.045144 | 1.0555169  | 10.135458 | 0.84581554 | 9.815924  | Hfe2          | NM_027126    | Hfe2            |
| 1434943_at   | 0.9961959  | 5.9918566 | 1.1011897  | 6.1364183 | 0.9171096  | 5.8725214 | 0.84571123 | 5.7555923 | BC023055      | NM_198108    | BC023055        |
| 1433782_at   | 1.0119919  | 6.9515185 | 1.0444291  | 6.985676  | 1.0111068  | 6.9388967 | 0.8454953  | 6.68083   | Cldn12        | NM_022890    | Cldn12          |
| 1425731_at   | 1.0186061  | 7.521068  | 1.0310632  | 7.5386047 | 0.9671575  | 7.446295  | 0.8449269  | 7.2513704 | Ankrd24       | NM_027480    | Ankrd24         |
| 1449949_a_at | 1.0295349  | 6.947944  | 1.0626988  | 6.9936843 | 0.9565631  | 6.8418837 | 0.8448614  | 6.662738  | Cxadr         | NM_001025192 | Cxadr           |
| 1427232_at   | 1.0240972  | 8.714721  | 0.91336477 | 8.549631  | 0.97000813 | 8.636437  | 0.84404886 | 8.435766  | Poldip2       | NM_026389    | Poldip2         |
| 1447816_x_at | 1.0354822  | 8.550191  | 0.97963166 | 8.4702    | 1.003556   | 8.505611  | 0.84403235 | 8.255259  | BC019806      | NM_145460    | BC019806        |
| 1455098_a_at | 1.0078897  | 6.1232386 | 1.086458   | 6.231533  | 1.1434636  | 6.305311  | 0.8431031  | 5.8656816 | Vtn           | NM_011707    | Vtn             |
| 1426902_at   | 1.0322667  | 9.007481  | 0.9303392  | 8.857493  | 0.9941928  | 8.953262  | 0.8421864  | 8.713877  | Coq6          | NM_172582    | Coq6            |
| 1451553_at   | 1.0646465  | 1.1082788 | 1.082788   | 7.1407447 | 1.1615379  | 7.20846   | 0.8414907  | 6.743443  | Art5          | NM_007491    | Art5            |
| 1423664_at   | 1.0119296  | 8.4953    | 0.98627734 | 8.458257  | 1.0106498  | 8.493475  | 0.84078676 | 8.228004  | Qdpr          | NM_024366    | Qdpr            |
| 1434268_at   | 0.9929247  | 5.93762   | 1.0350473  | 5.9975605 | 0.9715499  | 5.906224  | 0.8405845  | 5.697329  | Adar          | NM_019635    | Adar            |
| 1439448_x_at | 1.0405078  | 6.9677773 | 1.0769033  | 7.017378  | 0.89888525 | 6.756698  | 0.84021086 | 6.6593122 | Tmed9         | NM_026211    | Tmed9           |
| 1455985_x_at | 1.0212187  | 7.644974  | 0.92169744 | 7.4970474 | 0.94813335 | 7.5378447 | 0.83943915 | 7.36218   | Shmt2         | NM_028230    | Shmt2           |
| 1450490_at   | 0.98778826 | 6.7926607 | 0.9827573  | 6.7852945 | 0.88032544 | 6.6264963 | 0.83888656 | 6.556935  | Kcna7         | NM_010596    | Kcna7           |
| 1434072_at   | 1.0200964  | 7.560549  | 0.9006766  | 7.380924  | 1.1390463  | 7.7196693 | 0.83887196 | 7.278366  | Smcrr7        | NM_001009927 | Smcrr7          |
| 1418311_at   | 1.0452695  | 7.4536653 | 1.0214615  | 7.4204254 | 1.1074119  | 7.5369825 | 0.83881766 | 7.13622   | Fn3k          | NM_022014    | Fn3k            |
| 1459859_x_at | 1.0465187  | 8.760245  | 0.9411606  | 8.607161  | 0.9598864  | 8.635583  | 0.83876973 | 8.440994  | Chrac1        | NM_053068    | Chrac1          |
| 1438974_x_at | 1.0190668  | 6.357522  | 0.9537284  | 6.261924  | 1.1056405  | 6.475156  | 0.83839756 | 6.0759797 | Pitpnm1       | NM_008851    | Pitpnm1         |
| 1450943_at   | 0.9965801  | 6.1241746 | 1.0752182  | 6.2337465 | 1.0712553  | 6.2284193 | 0.8380518  | 5.8742285 | 2010012C16Rik | NM_025564    | 2010012C16Rik   |
| 1440836_at   | 0.9836404  | 6.5570655 | 1.0594261  | 6.664146  | 0.99394333 | 6.5720983 | 0.837895   | 6.325704  | BC035291      | NM_0177581   | 9430025N12Rik   |
| 1423238_at   | 0.99990374 | 10.464046 | 0.91834664 | 10.341294 | 0.9241167  | 10.350401 | 0.8378437  | 10.208937 | Itgbl1bp2     | NM_013712    | Itgbl1bp2       |
| 1452585_x_at | 1.0231944  | 10.256888 | 1.0584145  | 10.305713 | 0.9815086  | 10.196881 | 0.83776987 | 9.968433  | Mrps28        | NM_025434    | Mrps28          |
| 1434161_at   | 1.0361288  | 6.44381   | 1.0309671  | 6.436605  | 0.8957525  | 6.233779  | 0.83668166 | 6.1353574 | 5830457H20Rik | NM_173756    | 5830457H20Rik   |
| 1436349_at   | 1.0173057  | 7.8718805 | 1.0460837  | 7.912125  | 1.0270332  | 7.8856096 | 0.8365162  | 7.5895925 | 2700094K13Rik | NM_001033166 | 2700094K13Rik   |
| 1448212_at   | 1.0108069  | 8.232435  | 0.98218215 | 8.19099   | 0.9057639  | 8.074134  | 0.8364876  | 7.9593434 | Tnfrsf5p1     | NM_134138    | Tnfrsf5p1       |
| 1451936_a_at | 1.0136207  | 6.7194266 | 1.0160248  | 6.7228446 | 0.96070665 | 6.6420765 | 0.83517677 | 6.440062  | Txnrd2        | NM_013711    | Txnrd2          |
| 1423724_at   | 1.0197703  | 8.728514  | 0.91724485 | 8.575647  | 0.9113817  | 8.566397  | 0.8350824  | 8.440259  | Zwint         | NM_025635    | Zwint           |
| 1423266_at   | 1.0049691  | 9.709621  | 1.0780277  | 9.810865  | 0.93952864 | 9.612479  | 0.8349823  | 9.442287  | 2810405K02Rik | NM_025582    | 2810405K02Rik   |
| 1419803_s_at | 1.0216467  | 8.617849  | 0.9744289  | 8.549581  | 0.9551495  | 8.52075   | 0.8342434  | 8.325493  | Ccdc12        | NM_028312    | Ccdc12          |
| 1423970_at   | 0.99711055 | 6.89579   | 0.9249202  | 6.787366  | 0.9162801  | 6.7738256 | 0.83415    | 6.638344  | Thoc3         | NM_028597    | Thoc3           |
| 1433559_at   | 0.9948795  | 7.5146923 | 0.919478   | 7.5146923 | 0.919478   | 7.5467668 | 0.83397627 | 7.260177  | 9303175B01Rik | XM_128267    | Slc45a4         |
| 1455335_at   | 1.0508537  | 6.1713066 | 1.0674111  | 6.1938605 | 0.9941971  | 6.0913486 | 0.8332912  | 5.836637  | Xrc2          | NM_020570    | Xrc2            |
| 1416675_s_at | 0.9996268  | 7.119396  | 0.90323454 | 6.973107  | 0.89627546 | 6.9619484 | 0.83250797 | 6.8554707 | Plcd1         | NM_019676    | Plcd1           |
| 1428900_s_at | 1.0472913  | 7.725077  | 1.087485   | 7.7794094 | 0.96648145 | 7.6092286 | 0.83223057 | 7.3934693 | Mett5d1       | NM_029790    | Mett5d1         |
| 1418529_at   | 1.0169276  | 8.202192  | 0.96373975 | 8.12469   | 0.98006266 | 8.148921  | 0.831799   | 7.912282  | Osgp          | NM_133676    | Osgp            |
| 1427560_at   | 1.0187947  | 6.2412405 | 0.9976089  | 6.2109237 | 1.054375   | 6.2907653 | 0.83122593 | 5.94769   | Six5          | NM_011383    | Six5            |
| 1416148_at   | 0.98994434 | 9.005489  | 1.0107642  | 9.035517  | 0.9244214  | 8.9066925 | 0.8310401  | 8.753061  | Laptm4b       | NM_033521    | Laptm4b         |
| 1416885_at   | 1.022568   | 6.514572  | 0.9330379  | 6.3823824 | 0.92163914 | 6.364649  | 0.83088857 | 6.215102  | 1110038F14Rik | NM_054099    | 1110038F14Rik   |
| 1434344_at   | 1.0105417  | 7.824317  | 0.9072509  | 7.6687613 | 0.9475445  | 7.7314534 | 0.8292635  | 7.5390906 | Gpko          | NM_173747    | Gpko            |
| 1428507_at   | 0.99574876 | 7.510838  | 0.9580124  | 7.4551003 | 0.8710632  | 7.3178334 | 0.8280726  | 7.2448134 | Hdhd2         | NM_029826    | Hdhd2           |
| 1422642_at   | 1.0319107  | 7.2463694 | 0.91110986 | 7.0667486 | 0.99256235 | 7.1902814 | 0.82690847 | 6.926851  | Cdc42ep3      | NM_026514    | Cdc42ep3        |
| 1451543_at   | 1.0309075  | 6.8864746 | 0.97700787 | 6.8090014 | 0.91706022 | 6.7117648 | 0.82607424 | 6.566903  | Fbxo21        | NM_145564    | Fbxo21          |
| 1417563_at   | 0.9888446  | 6.0160923 | 0.9573066  | 5.9693294 | 0.88118136 | 5.8497877 | 0.8259444  | 5.7563934 | Eif4ebp1      | NM_007918    | Eif4ebp1        |
| 1436993_x_at | 1.0092064  | 8.1533785 | 1.0378286  | 8.193726  | 0.93041843 | 8.036109  | 0.8253356  | 7.86321   | Pfn2          | NM_019410    | Pfn2            |
| 1450759_at   | 1.0148467  | 6.8644595 | 0.900617   | 6.692183  | 0.98458445 | 6.820784  | 0.82492876 | 6.565539  | Bmp6          | NM_007556    | Bmp6            |
| 1416665_at   | 0.99839896 | 10.118753 | 0.9180164  | 9.997657  | 0.9156103  | 9.993871  | 0.8239282  | 9.841656  | Coq7          | NM_009940    | Coq7            |
| 1426364_at   | 1.0120002  | 8.042505  | 0.9844768  | 8.002726  | 0.94640094 | 7.945819  | 0.82389116 | 7.745821  | Mrrf          | NM_026422    | ---             |
| 1460254_at   | 1.0658606  | 8.475228  | 0.9852443  | 8.361763  | 1.1208403  | 8.547791  | 0.82363075 | 8.103279  | 1810049H13Rik | NM_025560    | 1810049H13Rik   |
| 1435763_at   | 0.9560481  | 7.4616575 | 1.0418124  | 7.585598  | 0.91103864 | 7.3920865 | 0.82308733 | 7.24562   | Tbc1d16       | NM_172443    | Tbc1d16         |
| 1454836_at   | 0.9796081  | 6.3236985 | 0.9210179  | 6.234723  | 0.98061186 | 6.3251762 | 0.82271427 | 6.0718856 | Tmem18        | NM_172049    | Tmem18          |
| 1448214_at   | 1.0264997  | 6.442618  | 0.98308975 | 6.3802805 | 0.9596933  | 6.3455305 | 0.8221165  | 6.1222997 | Pdhb          | NM_024221    | Pdhb            |
| 1426898_at   | 1.0178059  | 6.233875  | 0.9538674  | 6.1402726 | 1.0093637  | 6.221858  | 0.82120585 | 5.9242277 | Map3k7ip1     | NM_025609    | Map3k7ip1       |
| 1451278_a_at | 1.0199894  | 7.4934263 | 0.9495965  | 7.3902593 | 0.9566731  | 7.4009705 | 0.8207534  | 7.179893  | 2610205E22Rik | NM_170532    | 2610205E22Rik   |
| 1422538_at   | 1.0293223  | 7.431959  | 0.9902635  | 7.376149  | 1.0290993  | 7.431647  | 0.82071126 | 7.1052113 | Exl12         | NM_021388    | Exl12           |
| 1436224_at   | 0.9738559  | 6.95473   | 1.0294966  | 7.034889  | 0.9596194  | 6.933484  | 0.82033145 | 6.7072287 | Kif1c         | NM_153103    | Kif1c           |
| 1452298_a_at | 1.0086827  | 6.922765  | 0.9871662  | 6.8916574 | 0.90717953 | 6.7697525 | 0.8198658  | 6.623752  | Myo5b         | NM_201600    | Myo5b           |
| 1417066_at   | 1.0339015  | 11.154677 | 0.9053659  | 10.963152 | 1.0021331  | 11.109653 | 0.81973743 | 10.819813 | Cabc1         | NM_023341    | Cabc1           |
| 1424120_at   | 1.0075448  | 7.1256967 | 0.9434768  | 7.030912  | 1.0030711  | 7.119276  | 0.8193354  | 6.8273787 | Rnf8          | NM_021419    | Rnf8            |
| 1424988_at   | 1.0321647  | 7.7064557 | 1.0252817  | 7.6968026 | 1.0316088  | 7.7056785 | 0.81838757 | 7.371639  | Myliip        | NM_153789    | Myliip          |
| 1435159_at   | 0.9945809  | 6.3922644 | 0.96485543 | 6.3484883 | 0.96188945 | 6.3440466 | 0.8178439  | 6.110001  | 9430038I01Rik | XM_133909    | 9430038I01Rik   |
| 1435843_x_at | 1.0139043  | 7.763845  | 0.95296854 | 7.674424  | 0.88424975 | 7.5664496 | 0.81724066 | 7.452757  | Mrps9         | NM_023514    | Mrps9           |
| 1416709_a_at | 1.0160958  | 7.881618  | 0.9330172  | 7.758557  | 0.9334759  | 7.7592664 | 0.81723976 | 7.567413  | Ngrn          | NM_031375    | Ngrn            |
| 1418497_at   | 1.0352648  | 9.629     | 0.99026054 | 9.56488   | 0.994124   | 9.570498  | 0.8167777  | 9.287016  | Fgf13         | NM_010200    | Fgf13           |
| 1419462_s_at | 1.0362887  | 7.6206474 | 0.9213932  | 7.4511104 | 0.9491761  | 7.493969  | 0.8159349  | 7.2757473 | Gtl3          | NM_008187    | Gtl3            |
| 1449249_at   | 0.9829848  | 5.763282  | 0.9266349  | 5.6781135 | 1.0554999  | 5.865967  | 0.8152817  | 5.493411  | Pcdh7         | NM_018764    | Pcdh7           |
| 1457054_a_at | 1.0355939  | 6.125961  | 1.0583715  | 6.1573486 | 0.9525474  | 6.0053654 | 0.81454736 | 5.7795734 | D13002L05Rik  | NM_176997    | D13002L05Rik    |
| 1426216_at   | 1.0009158  | 8.759486  | 0.9356729  | 8.662242  | 0.8778094  | 8.570147  | 0.8142306  | 8.461676  | Cog6          | NM_026225    | Cog6            |
| 1417930_at   | 0.9773326  | 5.894448  | 0.8993082  | 5.774414  | 1.1132431  | 6.0822954 | 0.8139116  | 5.6304703 | Nab2          | NM_008668    | Nab2            |
| 1426746_at   | 1.021145   | 9.279928  | 0.9205901  | 9.130371  | 0.932299   | 9.148605  | 0.8136548  | 8.9522295 | 1810026J23Rik | NM_178619    | 1810026J23Rik   |
| 1451052_at   | 1.0177814  | 9.062456  | 0.9664351  | 8.987773  | 0.9284668  | 8.92995   | 0.81356114 | 8.739351  | Coq8          |              |                 |

|              |            |           |            |           |            |           |            |           |               |           |                 |
|--------------|------------|-----------|------------|-----------|------------|-----------|------------|-----------|---------------|-----------|-----------------|
| 1451848_a_at | 1.0187312  | 6.382161  | 0.95037884 | 6.2819624 | 0.93235606 | 6.25434   | 0.804169   | 6.040958  | Cryz          | NM_009968 | Cryz            |
| 1444028_s_at | 0.99304396 | 7.997342  | 0.9000967  | 7.8555646 | 0.9095651  | 7.8706617 | 0.80352205 | 7.6918225 | Dock9         | XM_358315 | Dock9           |
| 1449218_at   | 1.0077078  | 12.793404 | 0.94678915 | 12.703442 | 0.8853412  | 12.606632 | 0.8031958  | 12.46615  | Cox8b         | NM_007751 | Cox8b           |
| 1451791_at   | 1.0270168  | 9.456495  | 1.0582032  | 9.499652  | 0.9050042  | 9.274032  | 0.8031237  | 9.101729  | Tfpi          | NM_011576 | Tfpi            |
| 1427080_at   | 1.0239466  | 7.423209  | 0.94650674 | 7.309753  | 0.92602247 | 7.2781873 | 0.8030547  | 7.0726385 | 2610036D13Rik | NM_029282 | 2610036D13Rik   |
| 1416394_at   | 1.0219457  | 10.106299 | 0.97471315 | 10.058031 | 0.95384645 | 10.006809 | 0.80200225 | 9.756659  | Bag1          | NM_009736 | Bag1            |
| 1441919_x_at | 1.0084981  | 8.781776  | 0.9235902  | 8.644893  | 0.88662314 | 8.595961  | 0.8018289  | 8.450934  | Crat          | NM_007760 | Crat            |
| 1434142_at   | 1.0204549  | 6.2992964 | 0.9662676  | 6.220579  | 0.93122405 | 6.167285  | 0.80114734 | 5.950224  | Ppm1d         | NM_016910 | Ppm1d           |
| 1421309_at   | 1.0138121  | 7.0128784 | 1.031469   | 7.037789  | 0.934152   | 6.8948174 | 0.8001447  | 6.6714206 | Mgmt          | NM_008598 | Mgmt            |
| 1449076_x_at | 1.0103904  | 8.195162  | 1.005406   | 8.188028  | 0.96536344 | 8.129394  | 0.79944956 | 7.857328  | AL024210      | NM_134052 | AL024210        |
| 1415886_at   | 1.0066847  | 7.2170825 | 1.0001721  | 7.207719  | 0.96929187 | 7.162473  | 0.7993902  | 6.884423  | Sh2d3c        | NM_013781 | Sh2d3c          |
| 1416259_at   | 1.0315057  | 6.302728  | 1.0729051  | 6.359499  | 0.9425073  | 6.1725526 | 0.79875904 | 5.9338093 | Pex12         | NM_134025 | Pex12           |
| 1435334_at   | 1.0222739  | 6.0968976 | 0.8978291  | 5.9096284 | 0.8792237  | 5.8794174 | 0.7980746  | 5.739711  | Ttc7          | NM_028639 | Ttc7            |
| 1434756_at   | 0.9875481  | 7.2402563 | 1.0105112  | 7.2734184 | 0.9144451  | 7.1293015 | 0.79768527 | 6.932225  | 5430421B17    | NM_008055 | 5430421B17      |
| 1427014_at   | 0.9902753  | 7.7044883 | 1.0108196  | 7.734112  | 0.995473   | 7.7120404 | 0.79767656 | 7.392462  | BC026996      | NM_201407 | BC026996        |
| 1456590_x_at | 1.0203656  | 9.591692  | 0.9820906  | 9.536533  | 1.0048971  | 9.5696535 | 0.797011   | 9.235276  | Akr1b3        | NM_009658 | Akr1b3 /// LOC4 |
| 1452797_at   | 1.0212142  | 6.186606  | 0.9932086  | 6.146489  | 1.0262623  | 6.19372   | 0.79686284 | 5.8287234 | 2310010B21Rik | NM_027123 | 2310010B21Rik   |
| 1449626_s_at | 1.0362892  | 6.7569027 | 0.9192558  | 6.6482096 | 0.98050225 | 6.6770687 | 0.79677224 | 6.377715  | Acbd4         | NM_025988 | Acbd4           |
| 1421469_a_at | 0.99912506 | 7.39151   | 0.909422   | 7.255795  | 1.0273075  | 7.4316406 | 0.79576635 | 7.0631895 | Stat5a        | NM_011488 | Stat5a          |
| 1434988_x_at | 1.0369577  | 7.3672657 | 1.0667394  | 7.4081163 | 0.95490295 | 7.248335  | 0.79570556 | 6.985215  | Alhd2         | NM_008598 | Alhd2           |
| 1450835_a_at | 1.0077933  | 6.6588974 | 0.95838636 | 6.586377  | 0.91449004 | 6.5187373 | 0.79561657 | 6.317843  | Gfra4         | NM_020014 | Gfra4           |
| 1452204_at   | 0.97518015 | 8.14903   | 0.9856914  | 8.164497  | 0.9217319  | 8.067708  | 0.79531705 | 7.8548913 | Ank5          | NM_181413 | Ank5            |
| 1424194_at   | 1.0086198  | 8.9660425 | 0.9489547  | 8.878071  | 1.023467   | 8.9871235 | 0.7951962  | 8.623041  | Rcsd1         | NM_178593 | Rcsd1           |
| 1455600_at   | 1.0288457  | 6.538473  | 0.95026886 | 6.4238544 | 1.0067581  | 6.507164  | 0.79380304 | 6.1642995 | Rps3          | NM_012052 | Rps3            |
| 1438422_at   | 1.0362758  | 7.853289  | 0.90222704 | 7.658604  | 0.89921397 | 7.653778  | 0.79380167 | 7.473892  | Lrrc20        | NM_153542 | Lrrc20          |
| 1448286_at   | 1.0245786  | 10.129896 | 0.98493975 | 10.072973 | 0.9949601  | 10.087577 | 0.7936823  | 9.7615    | Hadh2         | NM_016763 | Hadh2           |
| 1450731_s_at | 1.010329   | 6.649171  | 1.0096561  | 6.6482096 | 0.9084889  | 6.4958863 | 0.79333985 | 6.3003564 | Tnfrsf21      | NM_178589 | Tnfrsf21        |
| 1443960_at   | 1.0326027  | 6.527357  | 0.92805237 | 6.3735294 | 0.92026985 | 6.3613806 | 0.7933156  | 6.147218  | Asrg1         | NM_025610 | ---             |
| 1424416_at   | 0.99965745 | 8.310202  | 0.92395484 | 8.196589  | 0.88392645 | 8.132693  | 0.79319936 | 7.976451  | Nkiras2       | NM_028024 | Nkiras2         |
| 1416403_at   | 1.0299628  | 6.8788824 | 0.8963584  | 6.6784377 | 0.9105712  | 6.7011337 | 0.79311    | 6.5018826 | Abcb10        | NM_019552 | Abcb10          |
| 1431189_a_at | 1.0011755  | 6.820653  | 0.9239037  | 6.7047725 | 0.9824214  | 6.7193372 | 0.79299706 | 6.4843454 | Fahd2a        | NM_029629 | Fahd2a          |
| 1451552_at   | 1.0143735  | 6.7098355 | 1.0293202  | 6.7309384 | 0.9636845  | 6.6358975 | 0.7924836  | 6.3536997 | 1500032H18Rik | AK048005  | 1500032H18Rik   |
| 1437840_s_at | 1.040538   | 8.078556  | 0.9461201  | 7.941322  | 0.907296   | 7.880872  | 0.7924338  | 7.685589  | AI325464      | NM_178882 | AI325464        |
| 1417405_at   | 1.0386881  | 8.047363  | 1.0391717  | 8.048035  | 1.1141005  | 8.14848   | 0.7911626  | 7.654647  | Stard3        | NM_021547 | Stard3          |
| 1460405_at   | 1.0131454  | 7.583891  | 0.90464354 | 7.4204707 | 0.9482745  | 7.488385  | 0.7908253  | 7.2264805 | Arhgef10l     | NM_172415 | Arhgef10l       |
| 1429213_at   | 1.0440542  | 8.067346  | 0.95459086 | 7.9381037 | 1.00148    | 7.8007282 | 0.79072845 | 7.666403  | 2310030N02Rik | XM_131300 | 2310030N02Rik   |
| 1418386_at   | 1.0205764  | 8.370754  | 1.0546433  | 8.418125  | 0.9914582  | 8.328994  | 0.7906361  | 8.002456  | 2510005D08Rik | NM_026526 | 2510005D08Rik   |
| 1452686_s_at | 1.0140337  | 7.423198  | 0.98405284 | 7.3799    | 0.9019117  | 7.2541504 | 0.7899021  | 7.062838  | D4Ert1d196e   | NM_025667 | D4Ert1d196e     |
| 1451322_at   | 1.0224621  | 8.704688  | 0.9454988  | 8.591787  | 1.0572333  | 8.7529335 | 0.7895703  | 8.3317795 | 2310016A09Rik | NM_181588 | 2310016A09Rik   |
| 1444307_at   | 1.00954576 | 8.186116  | 0.9231628  | 8.077342  | 1.063941   | 8.282103  | 0.78929484 | 7.851327  | AW491448      | ---       | ---             |
| 1456531_x_at | 1.0291765  | 10.960718 | 0.9744282  | 10.881856 | 0.9742617  | 10.881609 | 0.78911537 | 10.577537 | Prp19         | NM_134129 | Prp19           |
| 1452828_at   | 1.0050449  | 6.414078  | 0.95620525 | 6.3422103 | 0.94255507 | 6.321467  | 0.7884226  | 6.063859  | Fbxo21        | NM_145564 | Fbxo21          |
| 1436926_at   | 1.0080976  | 6.5150843 | 1.0732657  | 6.605456  | 0.96269614 | 6.448601  | 0.78708756 | 6.158045  | Esrb          | NM_011934 | Esrb            |
| 1419687_at   | 1.030197   | 10.480754 | 0.9685435  | 10.391723 | 0.97601986 | 10.402816 | 0.7870663  | 10.09239  | D930010J01Rik | NM_134147 | D930010J01Rik   |
| 1451088_a_at | 1.0147619  | 7.9345217 | 0.96449023 | 7.861219  | 0.8711555  | 7.714382  | 0.78636974 | 7.566666  | Oxa1l         | NM_026936 | Oxa1l           |
| 1455367_at   | 1.00814    | 6.050272  | 0.92686963 | 5.929014  | 0.930764   | 5.9306346 | 0.78633446 | 5.6917906 | Dnd1          | NM_173383 | Dnd1            |
| 1420484_a_at | 1.014928   | 7.2788258 | 0.95675737 | 7.193671  | 1.1140922  | 7.4133317 | 0.7859902  | 6.9100313 | Vtn           | NM_011707 | Vtn             |
| 1444112_at   | 1.0353473  | 8.199019  | 1.0332766  | 8.196131  | 0.9256284  | 8.037409  | 0.7853828  | 7.800372  | Zfp67         | BO174086  | ---             |
| 1417967_at   | 1.0207396  | 6.677792  | 0.901917   | 6.4992433 | 0.8738197  | 6.4535847 | 0.78532654 | 6.299541  | Mms19l        | NM_028152 | Mms19l          |
| 1449376_at   | 1.0202506  | 6.685377  | 0.95129925 | 6.584425  | 0.8638783  | 6.445353  | 0.78507054 | 6.3073483 | Nicn1         | NM_025449 | Nicn1           |
| 1419495_at   | 1.0262051  | 8.0778885 | 0.9919674  | 8.028934  | 0.97239816 | 8.000189  | 0.7847649  | 7.6909018 | Impmp2l       | NM_053122 | Impmp2l         |
| 1438910_a_at | 1.0020031  | 9.310661  | 0.9885843  | 9.291211  | 1.0057961  | 9.316113  | 0.7840494  | 8.956791  | Stom          | NM_013515 | Stom            |
| 1419097_a_at | 0.9855375  | 8.083638  | 0.9854755  | 8.083548  | 0.9033384  | 7.9579935 | 0.78358513 | 7.7528176 | Stom          | NM_013515 | Stom            |
| 1417694_at   | 1.0050818  | 8.249307  | 0.98028094 | 8.213262  | 0.98264897 | 8.2167425 | 0.7831783  | 7.889407  | Gab1          | NM_021356 | Gab1            |
| 1426272_at   | 0.96990395 | 6.514781  | 0.94239473 | 6.4732704 | 0.9401956  | 6.4699006 | 0.78263    | 6.20527   | Lmbr1         | NM_020295 | Lmbr1           |
| 1424062_at   | 1.0022585  | 8.041385  | 1.0164477  | 8.061666  | 0.94496584 | 7.956464  | 0.78221714 | 7.683771  | Ube2d1        | NM_145420 | Ube2d1          |
| 1437993_x_at | 1.0245031  | 9.922012  | 1.0203617  | 9.916168  | 0.9757008  | 9.851599  | 0.7820531  | 9.532427  | Odpr          | NM_024236 | Odpr            |
| 1424436_at   | 1.0128284  | 7.3320284 | 0.96750516 | 7.26598   | 0.8916009  | 7.1481085 | 0.7820196  | 6.958915  | Gart          | NM_010256 | Gart            |
| 1428444_at   | 1.027207   | 10.722078 | 0.93518764 | 10.586678 | 0.94744295 | 10.605461 | 0.78183395 | 10.328284 | Asb2          | NM_023049 | Asb2            |
| 1425292_at   | 0.9942827  | 7.710804  | 0.97109896 | 7.676766  | 0.884876   | 7.542623  | 0.7814066  | 7.363221  | Dtna          | NM_010087 | Dtna            |
| 1449933_a_at | 1.0001879  | 7.337737  | 0.89780766 | 7.181944  | 0.9636319  | 7.2840204 | 0.7808588  | 6.9806    | 5730449L18Rik | NM_025677 | 5730449L18Rik   |
| 1416195_at   | 1.0344667  | 7.4880357 | 0.9242198  | 7.3254557 | 0.9474879  | 7.361327  | 0.7808581  | 7.08228   | Pps           | NM_008916 | MGI:1194899     |
| 1423942_a_at | 1.0160828  | 8.422707  | 0.90649647 | 8.25806   | 0.9845796  | 8.377268  | 0.78050625 | 8.04217   | Camk2g        | NM_178597 | Camk2g          |
| 1429217_at   | 1.0127575  | 8.272595  | 0.98192775 | 8.227997  | 0.93268055 | 8.153762  | 0.7801965  | 7.8962164 | Zfp655        | NM_028298 | Zfp655          |
| 1418243_at   | 1.0362961  | 6.55478   | 1.172951   | 6.7334857 | 0.9247603  | 6.390495  | 0.7796837  | 6.1443043 | Zfp655        | NM_007995 | Fcna            |
| 1435911_s_at | 1.0115985  | 6.4565415 | 0.9917197  | 6.4279084 | 1.1568503  | 6.6501064 | 0.7795158  | 6.0805545 | Slc2a12       | NM_178934 | Slc2a12         |
| 1428915_at   | 1.0326258  | 8.105844  | 0.94941694 | 7.984639  | 0.99442357 | 8.051458  | 0.7795086  | 7.7001624 | Sirt5         | NM_178848 | Sirt5           |
| 1448319_at   | 1.015067   | 10.759014 | 0.9094927  | 10.600574 | 0.91863006 | 10.614996 | 0.77927494 | 10.377645 | LOC432549     | XM_484007 | LOC432549       |
| 1437489_x_at | 1.006844   | 7.986879  | 1.0018566  | 7.979714  | 0.891647   | 7.8115826 | 0.7788802  | 7.6165113 | Sdhd          | NM_025848 | Sdhd            |
| 1422478_a_at | 1.064447   | 7.410489  | 1.0767101  | 7.427015  | 0.9813202  | 7.2931805 | 0.7783319  | 6.9588423 | Acss2         | NM_019811 | Acss2           |
| 1456006_at   | 0.989763   | 6.0554495 | 0.94523746 | 5.989043  | 0.9573072  | 6.0073485 | 0.7780918  | 5.708307  | Bcl2l11       | NM_009754 | Bcl2l11         |
| 1429317_at   | 0.9996648  | 6.9257183 | 0.9233284  | 6.811118  | 0.8557751  | 6.7015057 | 0.7780391  | 6.564117  | Ors1l         | XM_125586 | Ors1l           |
| 1422461_at   | 1.0169998  | 7.453328  | 0.9037932  | 7.2830734 | 0.8916507  | 7.2635593 | 0.77777183 | 7.066427  | Atad3a        | NM_179203 | Atad3a          |
| 1455322_at   | 0.9552429  | 6.5050163 | 0.9087004  | 6.4329534 | 0.868235   | 6.367234  | 0.7773519  | 6.2077165 | Ttc21b        | XM_130319 | Ttc21b          |
| 1415948_at   | 1.0269265  | 9.329979  | 1.0974727  | 9.425831  | 0.9136377  | 9.161341  | 0.77716696 | 8.927942  | Creg1         | NM_011804 | Creg1           |
| 1436906_at   | 1.0279318  | 8.003413  | 0.993388   | 7.954098  | 0.9085962  | 7.8253794 | 0.77690005 | 7.5994697 | Rnf166        | XM_134599 | Rnf166          |
| 1423894_a_at | 1.0324258  | 6.829587  | 0.9102048  | 6.647812  | 0.8804819  | 6.599914  | 0.7768265  | 6.4192133 | Daird3        | NM_026378 | Daird3          |
| 1421344_a_at | 0.9        |           |            |           |            |           |            |           |               |           |                 |



|              |            |           |            |           |            |           |            |           |               |              |               |
|--------------|------------|-----------|------------|-----------|------------|-----------|------------|-----------|---------------|--------------|---------------|
| 1428508_at   | 0.9987281  | 6.4657803 | 0.90566295 | 6.3246627 | 0.90628046 | 6.325646  | 0.76652855 | 6.0840282 | 1810061M12Rik | NM_194334    | 1810061M12Rik |
| 1423357_at   | 1.029336   | 6.3927093 | 1.0024399  | 6.354511  | 0.95616436 | 6.2863255 | 0.7656658  | 5.9657817 | 2610209A20Rik | NM_026010    | 2610209A20Rik |
| 1433943_at   | 0.9848371  | 6.4748306 | 1.0638803  | 6.5862093 | 0.95822    | 6.435302  | 0.76533264 | 6.111032  | BC063749      | NM_001001738 | BC063749      |
| 1439962_at   | 1.0359063  | 6.4394674 | 1.0435047  | 6.450011  | 0.94592375 | 6.3083696 | 0.7650518  | 6.0022025 | 2310010J17Rik | BU945741     | 2310010J17Rik |
| 1452625_at   | 1.0136148  | 8.085343  | 0.89355445 | 7.9034615 | 0.871255   | 7.867001  | 0.7650028  | 7.6793714 | Kctd2         | NM_183285    | Kctd2         |
| 1423362_at   | 0.99086505 | 7.808719  | 0.96767515 | 7.7745533 | 0.9091556  | 7.6845574 | 0.76473665 | 7.4349933 | Sort1         | NM_019972    | Sort1         |
| 1435365_at   | 1.0165889  | 6.4403276 | 1.033544   | 6.4641914 | 0.97759885 | 6.3839006 | 0.7647302  | 6.0296114 | 4732415M23Rik | NM_177279    | 4732415M23Rik |
| 1454987_a_at | 1.0588487  | 8.227977  | 0.91731423 | 8.0209675 | 0.9513532  | 8.073533  | 0.76400644 | 7.7571363 | H2-Ke6        | NM_013543    | H2-Ke6        |
| 1434570_at   | 0.9841774  | 6.684578  | 0.923336   | 6.592553  | 0.95158136 | 6.635987  | 0.76398313 | 6.3192005 | AK122525      | NM_019641    | AK122525      |
| 1448566_at   | 1.0255647  | 5.8691344 | 1.0807594  | 5.9447613 | 0.94482243 | 5.750831  | 0.76379037 | 5.4439645 | Slc40a1       | NM_016917    | Slc40a1       |
| 1417580_s_at | 1.0454122  | 9.290575  | 0.897316   | 9.070191  | 0.9942349  | 9.218163  | 0.7634389  | 8.837088  | Selenbp1      | NM_009510    | Selenbp1      |
| 1423229_at   | 1.0023916  | 6.5036135 | 0.9028302  | 6.3526936 | 0.9526563  | 6.430195  | 0.7633388  | 6.1105623 | Inpp5e        | NM_033134    | Inpp5e        |
| 1449038_at   | 1.0822527  | 8.622159  | 0.9587428  | 8.447337  | 0.9412021  | 8.420699  | 0.76314074 | 8.118143  | Hsd11b1       | NM_008288    | Hsd11b1       |
| 1454646_at   | 0.9964791  | 9.415047  | 0.93480545 | 9.322872  | 0.9404416  | 9.331545  | 0.7626501  | 9.029227  | Tcp11i2       | NM_146008    | Tcp11i2       |
| 1452120_at   | 0.9743667  | 6.8147297 | 0.88657224 | 6.6785026 | 0.8820366  | 6.671103  | 0.76250565 | 6.461013  | 6330433E08Rik | XM_484765    | 6330433E08Rik |
| 1416488_at   | 0.985896   | 7.3455424 | 0.9995119  | 7.36533   | 0.87957907 | 7.18092   | 0.7612505  | 6.972478  | Ccng2         | NM_007635    | Ccng2         |
| 1419824_a_at | 0.9770452  | 6.399125  | 0.961098   | 6.375383  | 0.873044   | 6.236754  | 0.75996745 | 6.0366373 | A230062G08Rik | NM_173765    | A230062G08Rik |
| 1415849_s_at | 0.9896493  | 8.118273  | 0.90731066 | 7.9929523 | 0.8984841  | 7.9788485 | 0.75992095 | 7.737205  | Stmn1         | NM_019641    | Stmn1         |
| 1428106_at   | 1.0045568  | 9.277697  | 0.8354894  | 9.011831  | 0.89638335 | 9.113326  | 0.7594105  | 8.87409   | 1300001I01Rik | XM_181333    | 1300001I01Rik |
| 1435943_at   | 1.0692506  | 8.176844  | 1.0166594  | 8.10408   | 0.809126   | 8.089126  | 0.75855076 | 7.681561  | Dpep1         | NM_007876    | Dpep1         |
| 1439477_at   | 1.0156194  | 7.872608  | 0.88960916 | 7.681492  | 1.0694727  | 7.947148  | 0.75854295 | 7.451551  | 5430406J06Rik | NM_009458    | 5430406J06Rik |
| 1457632_s_at | 1.0210642  | 7.018428  | 1.0101179  | 7.0028777 | 0.89183426 | 6.8232017 | 0.7580884  | 6.5887923 | Mrg1          | NM_010825    | Mrg1          |
| 1454689_at   | 0.98495    | 7.6828413 | 0.88646936 | 7.530862  | 0.8864724  | 7.5308666 | 0.75804996 | 7.3050838 | Srrm1         | NM_016799    | Srrm1         |
| 1447743_x_at | 0.97816145 | 6.844282  | 0.9451413  | 6.7947392 | 0.9813261  | 6.848942  | 0.7579523  | 6.4763165 | Ext2          | NM_010163    | Ext2          |
| 1434581_at   | 1.0218723  | 6.0771284 | 0.9679253  | 5.9988813 | 0.8794941  | 5.860655  | 0.75783384 | 5.645867  | 2410066E13Rik | NM_026629    | ---           |
| 1453087_at   | 0.9908801  | 6.572854  | 0.9494346  | 6.511212  | 0.86193293 | 6.3717194 | 0.7575691  | 6.1855206 | 6330403L08Rik | AK018107     | 6330403L08Rik |
| 1420834_at   | 1.0217857  | 6.8596773 | 0.9210634  | 6.709955  | 1.0022286  | 6.8317966 | 0.7572965  | 6.427515  | Vamp2         | NM_009497    | Vamp2         |
| 1417298_at   | 0.9962034  | 6.254817  | 0.897331   | 6.1040173 | 0.91496056 | 6.1320863 | 0.7570693  | 5.8588023 | Ebpl          | NM_026598    | Ebpl          |
| 1416275_at   | 0.9834117  | 6.960397  | 0.89370507 | 6.8224    | 0.9709384  | 6.9419813 | 0.7567856  | 6.5824857 | Slc26a6       | NM_134420    | Slc26a6       |
| 1434133_s_at | 1.0068352  | 6.583533  | 0.9105467  | 6.43851   | 0.8543592  | 6.34662   | 0.7559503  | 6.1700683 | Wdr42a        | NM_153555    | Wdr42a        |
| 1433464_at   | 0.9854885  | 7.724221  | 0.8953816  | 7.634085  | 0.91308427 | 7.66233   | 0.754457   | 7.387021  | Ipo13         | NM_146152    | Ipo13         |
| 1428181_at   | 0.9977478  | 11.972067 | 0.95663244 | 11.911357 | 0.9172665  | 11.850733 | 0.7542822  | 11.568497 | Etfb          | NM_026695    | Etfb          |
| 1434621_at   | 1.0257407  | 8.377738  | 0.93629473 | 8.245749  | 0.8817704  | 8.159189  | 0.7538989  | 7.933158  | BC054438      | NM_001001183 | BC054438      |
| 1449836_x_at | 1.0415692  | 6.535334  | 1.0164806  | 6.5001583 | 1.0813707  | 6.5894365 | 0.7538839  | 6.0689898 | Bikik         | NM_007546    | Bikik         |
| 1453795_at   | 0.97259474 | 8.2788515 | 0.85716873 | 8.096592  | 0.84945816 | 8.083555  | 0.7528938  | 7.9094586 | Fahd2a        | NM_029629    | Fahd2a        |
| 1438477_a_at | 1.0345374  | 9.728697  | 0.93336993 | 9.442543  | 9.596957   | 9.596957  | 0.752444   | 9.269367  | Mcee          | NM_028626    | Mcee          |
| 1452387_a_at | 1.0245863  | 8.645399  | 0.9568629  | 8.564742  | 1.0899184  | 8.734578  | 0.75215286 | 8.199455  | Amtol2        | NM_019764    | Amtol2        |
| 1449886_a_at | 1.0405324  | 6.680632  | 0.9630929  | 6.569057  | 0.93357124 | 6.5241513 | 0.75179064 | 6.211713  | Timm9         | NM_001024853 | Timm9         |
| 1452468_s_at | 0.9931452  | 6.405199  | 0.8894545  | 6.2461146 | 0.8345405  | 6.154176  | 0.75172806 | 6.0034046 | Mnab          | NM_029556    | Mnab          |
| 1429739_a_at | 1.0012885  | 6.4774714 | 0.8552112  | 6.2499666 | 1.0802035  | 6.586917  | 0.7508617  | 6.062233  | Zfp278        | NM_019574    | Zfp278        |
| 1454840_at   | 1.0424353  | 8.248195  | 0.9801742  | 8.159348  | 0.8958067  | 8.029496  | 0.75021136 | 7.7736063 | Mccc2         | NM_030026    | Mccc2         |
| 1450784_at   | 0.9895327  | 6.7239327 | 0.8834152  | 6.560277  | 0.91338444 | 6.6084075 | 0.7481862  | 6.320583  | Rckc          | NM_016678    | Rckc          |
| 1435213_at   | 1.0164803  | 6.402273  | 0.98937684 | 6.3632827 | 0.9926692  | 6.368076  | 0.7451595  | 5.954312  | Nhlrc1        | NM_175340    | Nhlrc1        |
| 1437171_x_at | 1.0102295  | 11.931174 | 0.94498885 | 11.834861 | 0.95635664 | 11.852113 | 0.74455637 | 11.490946 | Gsn           | NM_146120    | Gsn           |
| 1422811_at   | 1.0389515  | 8.087643  | 0.8920085  | 7.867643  | 0.9232901  | 7.917369  | 0.7435121  | 7.604942  | Slc27a1       | NM_011977    | Slc27a1       |
| 1431980_a_at | 1.0488856  | 7.261548  | 0.9520912  | 7.1218624 | 0.9048308  | 7.0484114 | 0.7433091  | 6.764725  | As3mt         | NM_020577    | As3mt         |
| 1438886_at   | 1.0028208  | 6.564041  | 0.9110598  | 6.425595  | 0.9004031  | 6.4086204 | 0.7432181  | 6.131835  | Heyl          | NM_013905    | Heyl          |
| 1419503_at   | 1.0297377  | 6.8142962 | 0.96179265 | 6.7158175 | 0.92904335 | 6.6658373 | 0.74258804 | 6.3426533 | Stc2          | NM_011491    | Stc2          |
| 1420686_at   | 1.0037574  | 6.5634475 | 1.0149127  | 6.5793924 | 0.95889544 | 6.4974823 | 0.74234223 | 6.1281934 | Scyb4         | NM_019574    | Scyb4         |
| 1436991_x_at | 1.0190177  | 11.546623 | 0.93684524 | 11.425326 | 0.9402883  | 11.430619 | 0.742134   | 11.089196 | Gsn           | NM_146120    | Gsn           |
| 1417857_at   | 1.0144963  | 8.390846  | 0.983941   | 8.346726  | 0.8962776  | 8.2121    | 0.74116325 | 7.9379454 | Mnaa          | NM_133823    | Mnaa          |
| 1417581_at   | 1.0279733  | 6.374513  | 0.9754643  | 6.2988715 | 0.9056387  | 6.191718  | 0.7400302  | 5.9003663 | Dhodh         | NM_020046    | Dhodh         |
| 1454803_a_at | 0.9704952  | 7.2348685 | 1.0060523  | 7.2867804 | 0.8772137  | 7.0890756 | 0.7399597  | 6.843594  | Hdac11        | NM_144919    | Hdac11        |
| 1417103_at   | 1.0359101  | 9.295706  | 0.9961387  | 9.377237  | 0.9170243  | 9.11984   | 0.73989475 | 8.10102   | Ddt           | NM_100027    | Ddt           |
| 1450504_a_at | 1.0320313  | 9.320511  | 0.9764615  | 9.24066   | 0.9869054  | 9.256008  | 0.7393878  | 8.839427  | Agpat3        | NM_053014    | Agpat3        |
| 1426994_at   | 0.98920184 | 7.7905107 | 0.97415006 | 7.7683897 | 0.92737126 | 7.6973925 | 0.7393191  | 7.3704424 | Plekhe1       | XM_129968    | Plekhe1       |
| 1425114_at   | 1.0360702  | 6.8761387 | 0.9860525  | 6.804753  | 0.8826864  | 6.6449895 | 0.7392396  | 6.3891306 | Rbbp6         | NM_175023    | Rbbp6         |
| 1417374_at   | 1.0218773  | 11.980765 | 0.9581355  | 11.887845 | 0.91457534 | 11.820718 | 0.7390382  | 11.513265 | Tuba4         | NM_009447    | Tuba4         |
| 1427465_at   | 0.9634029  | 7.961893  | 1.0467527  | 8.081602  | 0.8837934  | 7.8374634 | 0.7390073  | 7.579343  | Atp1a2        | NM_178405    | Atp1a2        |
| 1439493_at   | 0.9764863  | 6.375343  | 1.0281113  | 6.449668  | 0.9060348  | 6.2673097 | 0.7387052  | 5.972742  | D630040G17Rik | BC041776     | D630040G17Rik |
| 1420095_s_at | 0.97808385 | 6.422347  | 0.96481174 | 6.402637  | 0.8364175  | 6.1966124 | 0.73849595 | 6.016979  | Zipr01        | NM_011757    | Zipr01        |
| 1422780_at   | 1.007341   | 7.438304  | 0.94561386 | 7.347075  | 0.89870906 | 7.273678  | 0.73834276 | 6.990114  | Pxmp4         | NM_021534    | Pxmp4         |
| 1456144_at   | 1.0113664  | 6.516915  | 1.0756007  | 6.6057515 | 0.9296675  | 6.3953958 | 0.7366066  | 6.059575  | Nav3          | XM_618813    | Nav3          |
| 1427113_s_at | 0.97155106 | 6.851105  | 0.9204434  | 6.7731447 | 0.8401644  | 6.6414866 | 0.7356346  | 6.449805  | 2700049H19Rik | BC005511     | 2700049H19Rik |
| 1423303_at   | 1.0080018  | 6.7893    | 0.8676091  | 6.572919  | 0.9377799  | 6.685123  | 0.7355581  | 6.334713  | Paxip1        | NM_018878    | Paxip1        |
| 1451486_at   | 1.0562925  | 6.7447248 | 1.0782294  | 6.7743797 | 0.9441803  | 6.5828495 | 0.7355307  | 6.222573  | 1200006F02Rik | NM_027872    | 1200006F02Rik |
| 1430287_s_at | 1.0242043  | 7.792384  | 1.0343213  | 7.8065653 | 0.92806435 | 7.6501775 | 0.7354056  | 7.3144927 | Hemk1         | NM_133984    | Hemk1         |
| 1455528_at   | 1.0526319  | 6.7508283 | 1.0108443  | 6.6923885 | 0.9501517  | 6.603057  | 0.7353453  | 6.2333207 | CA977242      | ---          | ---           |
| 1416332_at   | 1.0512441  | 8.053663  | 0.9097347  | 7.845083  | 0.9735507  | 7.942893  | 0.7350138  | 7.5374084 | Cirbp         | NM_007705    | Cirbp         |
| 1439830_at   | 0.9980316  | 7.0021873 | 0.978728   | 6.9740095 | 0.81876755 | 6.7165556 | 0.7349343  | 6.559851  | Map3k5        | NM_008580    | Map3k5        |
| 1449944_a_at | 0.96015227 | 6.5201173 | 0.9251494  | 6.4665403 | 0.85837424 | 6.3584604 | 0.7340454  | 6.1327233 | Sec61a2       | NM_021305    | Sec61a2       |
| 1427342_at   | 1.0335575  | 7.332346  | 1.0373456  | 7.337624  | 0.93003994 | 7.180092  | 0.73293674 | 6.8364873 | 5330408N05Rik | NM_177244    | 5330408N05Rik |
| 1424777_at   | 1.0097337  | 7.2606254 | 0.8662066  | 7.0394335 | 0.8816381  | 7.064909  | 0.73161775 | 6.795813  | Wdr21         | NM_030246    | Wdr21         |
| 1448489_at   | 1.0056666  | 7.1179276 | 0.8755764  | 6.9180803 | 0.83763146 | 6.854163  | 0.7313537  | 6.6584167 | PafaH2        | NM_133880    | PafaH2        |
| 1416522_a_at | 1.0032642  | 10.83718  | 0.89524657 | 10.672835 | 0.9209628  | 10.713694 | 0.73077226 | 10.379972 | Grcct10       | NM_013535    | Grcct10       |
| 1423063_at   | 0.93534786 | 6.879668  | 0.8403573  | 6.725168  | 0.7943813  | 6.643997  | 0.73043525 | 6.522922  | Dnmt3a        | NM_007872    | Dnmt3a        |
| 1453287_at   | 1.0277812  | 7.4003    | 1.0527947  | 7.434991  | 0.91899806 | 7.2389007 |            |           |               |              |               |

|              |            |           |            |           |            |            |            |           |               |              |               |
|--------------|------------|-----------|------------|-----------|------------|------------|------------|-----------|---------------|--------------|---------------|
| 1450539_at   | 1.0119396  | 7.3522186 | 0.889452   | 7.166084  | 0.8866488  | 7.1615295  | 0.71986586 | 6.8608947 | Krtap5-1      | NM_015808    | Krtap5-1      |
| 1428996_at   | 0.91617703 | 6.23061   | 1.0313807  | 6.4014883 | 0.8862556  | 6.182706   | 0.7196625  | 5.8823037 | 4833426J09Rik | NM_001024606 | Gm1705        |
| 1436426_at   | 0.95840895 | 6.2122116 | 0.8269414  | 5.9993544 | 0.8855718  | 6.098179   | 0.71882004 | 5.7972    | 5730509K17Rik | NM_172274    | 5730509K17Rik |
| 1417061_at   | 1.0356894  | 6.5371175 | 1.1215668  | 6.652042  | 1.0078299  | 6.497778   | 0.71879166 | 6.0101714 | Slc40a1       | NM_016917    | Slc40a1       |
| 1455882_x_at | 1.0327387  | 6.644229  | 1.1402735  | 6.7871337 | 1.0563868  | 6.676892   | 0.7187853  | 6.1213865 | A93004G11Rik  | NM_177033    | A93004G11Rik  |
| 1435188_at   | 1.0663916  | 6.7110796 | 1.1155248  | 6.7760653 | 1.0137273  | 6.6380124  | 0.71855706 | 6.1415176 | LOC433627     | XM_485280    | LOC433627     |
| 1428025_s_at | 1.0252987  | 7.2321634 | 1.069642   | 7.293247  | 0.93371425 | 7.09711775 | 0.7179334  | 6.718041  | Pitpnc1       | NM_015823    | Pitpnc1       |
| 1424715_at   | 1.018833   | 8.855688  | 1.0434387  | 8.890116  | 0.98696834 | 8.809846   | 0.71778387 | 8.350392  | O610039N19Rik | NM_026159    | O610039N19Rik |
| 1428926_at   | 1.0143592  | 8.390133  | 0.88976395 | 8.201059  | 0.9272315  | 8.260565   | 0.71775174 | 7.891121  | 1110003O08Rik | NM_133765    | 1110003O08Rik |
| 1424247_at   | 0.98305094 | 7.1328583 | 0.9813355  | 7.130338  | 0.91569185 | 7.030454   | 0.7173044  | 6.6781774 | Rab6ip2       | NM_053204    | Rab6ip2       |
| 1451550_at   | 0.9516281  | 5.9519706 | 0.9074165  | 5.8833375 | 0.9107707  | 5.8886604  | 0.71693355 | 5.543412  | Ephb3         | NM_010143    | Ephb3         |
| 1420124_s_at | 1.0649606  | 8.385345  | 0.9076778  | 8.1547985 | 0.89794534 | 8.139245   | 0.71497333 | 7.810507  | Tcta          | NM_133986    | Tcta          |
| 1425231_a_at | 0.98432624 | 8.164882  | 0.97517735 | 8.151411  | 0.9096062  | 8.050987   | 0.7147497  | 7.7031837 | Zfp46         | NM_009557    | Zfp46         |
| 1428812_at   | 1.0514816  | 7.1375184 | 1.021641   | 7.0959835 | 0.9696932  | 7.020695   | 0.71472245 | 6.58055   | 1700040L02Rik | NM_028491    | 1700040L02Rik |
| 1456541_x_at | 1.0110636  | 7.271941  | 0.9513756  | 7.184154  | 0.8990858  | 7.102598   | 0.7144923  | 6.7710576 | Atad3a        | NM_179203    | Atad3a        |
| 1419270_a_at | 1.0252333  | 6.6404495 | 0.9562604  | 6.5399723 | 0.9008118  | 6.4537945  | 0.7140326  | 6.118559  | Dut           | NM_023595    | Dut           |
| 1426346_at   | 0.99801326 | 6.6074944 | 0.9882097  | 6.593252  | 0.8076803  | 6.3022194  | 0.71234375 | 6.1210084 | Prepl         | NM_145894    | Prepl         |
| 1421836_at   | 0.9771265  | 6.773022  | 0.96938384 | 6.761545  | 0.87688166 | 6.616859   | 0.7121544  | 6.3166666 | Mtap7         | NM_008365    | Mtap7         |
| 1443558_s_at | 0.98179495 | 7.8188953 | 0.95355856 | 7.776795  | 0.84513617 | 7.6026573  | 0.7120545  | 7.355461  | C630002B14Rik | NM_175331    | C630002B14Rik |
| 1443866_at   | 1.0230224  | 9.591705  | 1.080204   | 9.670172  | 0.8998926  | 9.406693   | 0.7115861  | 9.067979  | A930016D02Rik | NM_176920    | A930016D02Rik |
| 1439381_x_at | 0.9901414  | 8.304808  | 0.86936575 | 8.117136  | 0.8358093  | 8.060346   | 0.70976245 | 7.8245087 | Marveld1      | NM_183195    | Marveld1      |
| 1420113_s_at | 1.0193019  | 7.036278  | 0.93389624 | 6.9100304 | 0.8944366  | 6.847747   | 0.7088757  | 6.5123005 | 2410022L05Rik | NM_025556    | 2410022L05Rik |
| 1416194_at   | 1.0455937  | 8.124922  | 0.8997436  | 7.9081855 | 0.9947967  | 8.053073   | 0.7087297  | 7.5639067 | Cyp4b1        | NM_007823    | Cyp4b1        |
| 1449501_a_at | 1.0386982  | 6.4871984 | 1.0082054  | 6.4442115 | 0.96789956 | 6.3853507  | 0.70792747 | 5.934095  | Gzmm          | NM_008504    | Gzmm          |
| 1418219_at   | 1.0599241  | 8.753631  | 0.9133034  | 8.538836  | 0.9600231  | 8.61081    | 0.70762885 | 8.170733  | Il15          | NM_008357    | Il15          |
| 1439766_x_at | 1.0418801  | 6.409768  | 0.88601923 | 6.175989  | 1.0461825  | 6.4157133  | 0.7070182  | 5.850398  | Vegfc         | NM_009506    | Vegfc         |
| 1455750_at   | 0.98958147 | 7.2928824 | 0.985599   | 7.2870646 | 0.85528004 | 7.0824604  | 0.70574886 | 6.8052187 | BC053994      | XM_025347    | BC053994      |
| 1452664_a_at | 0.9721328  | 7.228859  | 0.872669   | 7.0731397 | 0.8160569  | 6.976375   | 0.7056554  | 6.766669  | Tm7f3         | NM_026281    | Tm7f3         |
| 1423108_at   | 1.0289695  | 9.857399  | 0.97686124 | 9.782424  | 0.9498493  | 9.74197    | 0.7056225  | 9.313168  | Slc25a20      | NM_020520    | Slc25a20      |
| 1423597_at   | 1.0466257  | 6.6654696 | 1.1031213  | 6.741316  | 1.0126927  | 6.6179204  | 0.70492816 | 6.095272  | Atp8a1        | NM_009727    | Atp8a1        |
| 1416840_at   | 1.0739295  | 8.95964   | 0.98209536 | 9.730677  | 1.030578   | 9.800195   | 0.7048244  | 9.251377  | Mid1ip1       | NM_026524    | Mid1ip1       |
| 1435448_at   | 1.0059776  | 7.135396  | 0.8472106  | 6.8875904 | 0.98569244 | 7.1060076  | 0.70441633 | 6.621298  | Bcl2i11       | NM_009754    | Bcl2i11       |
| 1419302_at   | 0.97746176 | 6.7647896 | 0.9064049  | 6.655905  | 0.86048955 | 6.800907   | 0.70316553 | 6.2896137 | Heyl          | NM_013905    | Heyl          |
| 1424877_a_at | 1.0402277  | 9.556423  | 0.9438778  | 9.416197  | 0.8918064  | 9.334328   | 0.7025313  | 8.990159  | Alad          | NM_008525    | Alad          |
| 1454795_at   | 1.0063655  | 8.722238  | 0.9923526  | 8.702009  | 0.8656173  | 8.504885   | 0.7024479  | 8.203547  | Cobll1        | NM_177025    | Cobll1        |
| 1437829_s_at | 1.0229905  | 7.269949  | 0.88567954 | 7.062012  | 0.85890234 | 7.017722   | 0.7024156  | 6.7275524 | Eef2k         | NM_007908    | Eef2k         |
| 1454693_at   | 1.0231634  | 6.243902  | 1.0170074  | 6.2351956 | 0.9930119  | 6.2007484  | 0.70160836 | 5.699604  | LOC545348     | XM_622270    | LOC545348     |
| 1438010_at   | 0.9978583  | 6.123152  | 0.8987526  | 5.972241  | 0.95019184 | 5.98254    | 0.70141864 | 5.6145926 | D4Ertid429e   | NM_001025106 | D4Ertid429e   |
| 1439994_at   | 1.0237005  | 5.9871144 | 0.9372497  | 5.859826  | 0.8993278  | 5.8003926  | 0.7005896  | 5.4399624 | AK045702      | ---          | ---           |
| 1418976_s_at | 1.0263265  | 6.0300016 | 0.93519276 | 5.8958473 | 0.9819567  | 5.966243   | 0.7004856  | 5.478939  | Cideb         | NM_009894    | Cideb         |
| 1441915_s_at | 1.032301   | 10.058203 | 0.8252349  | 7.735216  | 0.95462257 | 9.945341   | 0.6985746  | 9.494824  | 2310076L09Rik | NM_025874    | 2310076L09Rik |
| 1424505_at   | 1.0269691  | 7.9252863 | 0.93832934 | 7.7995097 | 0.8988236  | 7.733003   | 0.6978956  | 7.3679767 | D610042C05Rik | NM_025343    | D610042C05Rik |
| 1424383_at   | 1.0123185  | 7.444398  | 0.8941236  | 7.2652802 | 0.91779745 | 7.3029823  | 0.69759095 | 6.9071875 | Tmem51        | NM_145402    | Tmem51        |
| 1456204_at   | 1.0449985  | 8.264145  | 0.98439485 | 8.177952  | 0.9216441  | 8.082926   | 0.69707006 | 7.6800194 | 2010107H07Rik | XM_619218    | 2010107H07Rik |
| 1435258_at   | 1.0274746  | 7.1046305 | 0.93182504 | 6.9636583 | 0.94704133 | 6.987026   | 0.69683284 | 6.544412  | D2Ertid217e   | XM_619738    | D2Ertid217e   |
| 1433839_at   | 1.0172596  | 6.6676207 | 0.92488897 | 6.5302844 | 0.8909346  | 6.476324   | 0.6960678  | 6.120232  | AI875199      | NM_153591    | AI875199      |
| 1450725_s_at | 1.0088354  | 9.192075  | 0.9686542  | 9.133438  | 0.872779   | 8.983073   | 0.69451845 | 8.653469  | Car14         | NM_011797    | Car14         |
| 1444504_at   | 1.013617   | 10.798024 | 1.0531768  | 10.853259 | 1.008666   | 10.79096   | 0.6942577  | 10.252055 | 1110001P11Rik | NM_001013013 | 1110001P11Rik |
| 1449595_at   | 1.0009757  | 7.4945602 | 0.8826905  | 7.3131323 | 0.9747638  | 7.4562774  | 0.69216025 | 6.9623313 | Tcf15         | NM_009328    | Tcf15         |
| 1424252_at   | 0.9892212  | 5.915869  | 1.0462027  | 5.9966664 | 0.901839   | 5.782446   | 0.6920416  | 5.4004345 | D630040G17Rik | BC041776     | D630040G17Rik |
| 1448666_s_at | 1.0018195  | 8.269441  | 1.1336685  | 8.447817  | 0.9879844  | 8.249378   | 0.6918975  | 7.735449  | Tob2          | NM_020507    | Tob2          |
| 1452716_at   | 1.0080147  | 6.557303  | 0.95954776 | 6.4862127 | 0.76032925 | 6.1504827  | 0.689591   | 6.0095987 | 5730469M10Rik | NM_027464    | 5730469M10Rik |
| 1435417_at   | 0.97156936 | 7.334778  | 0.94018173 | 7.2874007 | 0.94237167 | 7.290757   | 0.689343   | 6.8396826 | AI464131      | XM_283952    | AI464131      |
| 1439804_at   | 0.9420457  | 5.939322  | 0.89005506 | 5.8574195 | 0.75494325 | 5.619893   | 0.68827033 | 5.4865007 | 2310015A10Rik | AK053779     | ---           |
| 1424669_at   | 1.0327498  | 7.573658  | 0.9439859  | 7.444004  | 0.91938704 | 7.405911   | 0.6881704  | 6.9880047 | Zfyve21       | NM_026752    | Zfyve21       |
| 1423859_a_at | 0.98461574 | 12.319549 | 1.0303808  | 12.385094 | 0.83905953 | 12.08876   | 0.6878932  | 11.802173 | Zfyve21       | NM_008963    | Zfyve21       |
| 1449553_at   | 0.9456628  | 7.841711  | 0.8713726  | 7.723675  | 0.78934413 | 7.5810394  | 0.6876696  | 7.3821006 | 2610200G18Rik | NM_025998    | 2610200G18Rik |
| 1460565_at   | 1.0028352  | 8.038263  | 0.9559149  | 7.9691334 | 0.8858347  | 7.859288   | 0.6858428  | 7.490129  | Slc41a1       | NM_173865    | Slc41a1       |
| 1434735_at   | 1.0372448  | 6.3405585 | 1.0153605  | 6.3097935 | 0.90957946 | 6.151073   | 0.684769   | 5.741491  | Hif           | NM_172563    | Hif           |
| 1439143_at   | 0.92761314 | 6.640994  | 0.9027402  | 6.601782  | 0.7939335  | 6.4164896  | 0.6836744  | 6.2007804 | 9.33E+12      | NM_199318    | 9.33E+12      |
| 1433819_s_at | 0.99982065 | 7.2655344 | 0.85789555 | 7.0446672 | 0.8503901  | 7.0319896  | 0.68340504 | 6.7166057 | Agpat3        | NM_053014    | Agpat3        |
| 1426502_s_at | 1.0079975  | 8.330333  | 0.96062577 | 8.260887  | 0.9191785  | 8.197257   | 0.683328   | 7.769491  | Gpt1          | NM_182805    | Gpt1          |
| 1436917_s_at | 1.0025753  | 8.557027  | 0.9174937  | 8.429087  | 0.7864279  | 8.206702   | 0.6827715  | 8.00279   | Gpsm1         | NM_153410    | Gpsm1         |
| 1448370_at   | 0.98022103 | 8.105697  | 0.963875   | 8.081436  | 0.81611764 | 7.8413672  | 0.6810851  | 7.580425  | Ulk1          | NM_009469    | Ulk1          |
| 1454721_at   | 0.97027314 | 6.482151  | 0.9669168  | 6.477152  | 0.7597299  | 6.1292467  | 0.6795599  | 5.968361  | 1110018G07Rik | NM_178065    | 1110018G07Rik |
| 1456793_at   | 1.0247416  | 7.1259775 | 0.93699557 | 6.9968314 | 0.9310877  | 6.9877057  | 0.6792272  | 6.5326834 | Cyt1          | XM_132070    | Cyt1          |
| 1428657_at   | 0.9962853  | 8.5493965 | 0.917765   | 8.430963  | 0.81271434 | 8.255586   | 0.679223   | 7.9967227 | B930013M22Rik | NM_001013392 | B930013M22Rik |
| 1424611_x_at | 1.0690109  | 6.6318917 | 0.8738584  | 6.3410864 | 0.88947546 | 6.366642   | 0.6781931  | 5.975383  | Trub2         | NM_145520    | Trub2         |
| 1427344_s_at | 1.0075976  | 5.9086924 | 1.0604746  | 5.9824834 | 0.9528969  | 5.828165   | 0.67792374 | 5.336968  | Rasd2         | XM_204287    | Rasd2         |
| 1447693_s_at | 0.9819219  | 7.9233685 | 0.9118212  | 7.8165107 | 0.8924906  | 7.7855973  | 0.67745733 | 7.3878903 | Neo1          | NM_008684    | Neo1          |
| 1452216_at   | 1.0366497  | 7.608625  | 0.92797756 | 7.4488587 | 0.93084425 | 7.453308   | 0.67474496 | 6.9891114 | BC025519      | NM_001030014 | BC025519      |
| 1438680_at   | 0.9595775  | 7.0698833 | 0.8603376  | 6.912387  | 0.77848697 | 6.7681575  | 0.6740722  | 6.5603876 | Auts2         | XM_620260    | Auts2         |
| 1458345_s_at | 1.0299897  | 6.6277494 | 1.0107442  | 6.6005373 | 1.0251327  | 6.6209307  | 0.67260057 | 6.0129414 | Colec11       | NM_283054    | Colec11       |
| 1424671_at   | 1.0055627  | 8.461044  | 1.0516545  | 8.5257015 | 0.79811597 | 8.127711   | 0.6725391  | 7.880731  | Plekhl1       | NM_024413    | Plekhl1       |
| 1424226_at   | 1.0161326  | 7.3642244 | 0.86430025 | 7.13074   | 0.843487   | 7.0955734  | 0.6724027  | 6.768533  | 9030617O03Rik | NM_145448    | 9030617O03Rik |
| 1448667_x_at | 0.97926986 | 9.130858  | 1.1360492  | 9.345105  | 0.97       |            |            |           |               |              |               |

|              |            |           |            |            |            |           |            |           |               |              |                  |
|--------------|------------|-----------|------------|------------|------------|-----------|------------|-----------|---------------|--------------|------------------|
| 1437498_at   | 0.9891195  | 6.6682296 | 0.86105615 | 6.4681926  | 0.87152857 | 6.485633  | 0.64161474 | 6.0437922 | LOC433231     | XM_488871    | LOC433231        |
| 1455136_at   | 0.9780287  | 8.118601  | 1.0344071  | 8.199456   | 0.8517728  | 7.9191923 | 0.640806   | 7.5086117 | Atp1a2        | NM_178405    | Atp1a2           |
| 1415812_at   | 0.9968308  | 11.948938 | 0.82813513 | 11.681456  | 0.8064538  | 11.643182 | 0.6405729  | 11.310952 | Gsn           | NM_146120    | Gsn              |
| 1434893_at   | 0.95388067 | 7.6069927 | 0.94212097 | 7.5890965  | 0.8317434  | 7.4093223 | 0.638388   | 7.0276175 | Atp1a2        | NM_178405    | Atp1a2           |
| 1452308_a_at | 0.9595902  | 10.272187 | 0.9794099  | 10.3016815 | 0.8257517  | 10.055476 | 0.6383292  | 9.684069  | Atp1a2        | NM_178405    | Atp1a2           |
| 1419606_a_at | 0.98368263 | 6.8406415 | 0.9419571  | 6.7781096  | 0.9312262  | 6.76158   | 0.6379618  | 6.215918  | Tnnt1         | NM_011618    | Tnnt1            |
| 1441937_s_at | 1.0566294  | 8.632867  | 0.9695617  | 8.508802   | 0.9852516  | 8.5319605 | 0.6377722  | 7.9045105 | Pink1         | NM_144903    | Pink1            |
| 1457139_at   | 0.9978321  | 7.7648587 | 0.88902855 | 7.598291   | 0.7921387  | 7.431814  | 0.6372213  | 7.117855  | Auts2         | XM_620260    | Auts2            |
| 1451194_at   | 1.0989549  | 6.195915  | 0.964691   | 6.007921   | 0.8515386  | 5.8279266 | 0.63608956 | 5.407084  | Aldob         | NM_144903    | Aldob            |
| 1428739_at   | 1.0162029  | 6.876771  | 1.0192746  | 6.881125   | 0.94834346 | 6.7770634 | 0.63536817 | 6.199247  | 2310040A07Rik | NM_175138    | 2310040A07Rik    |
| 1422698_s_at | 0.9514117  | 7.2898993 | 0.892538   | 7.1977434  | 0.87243557 | 7.164878  | 0.63377094 | 6.7037907 | Jarid2        | NM_021878    | Jarid2           |
| 1454850_at   | 1.061802   | 7.3734255 | 1.0843488  | 7.4037395  | 1.0774169  | 7.3944874 | 0.63358223 | 6.6285143 | Tbc1d10c      | NM_178650    | Tbc1d10c         |
| 1416756_at   | 1.0236002  | 8.665142  | 0.99186075 | 8.6196995  | 0.84142965 | 8.382403  | 0.6303328  | 7.965675  | Dnajb1        | NM_018808    | Dnajb1           |
| 1417408_at   | 1.0004679  | 6.3846726 | 0.92000455 | 6.2637105  | 0.9058196  | 6.2412934 | 0.6266985  | 5.7098413 | F3            | NM_010171    | F3               |
| 1419156_at   | 1.0227319  | 7.222262  | 0.765662   | 6.804614   | 0.7991543  | 6.86638   | 0.6253898  | 6.512662  | Sox4          | NM_009238    | Sox4             |
| 1440870_at   | 0.9733818  | 7.0730968 | 1.0398738  | 7.168428   | 0.7945835  | 6.7802896 | 0.6250066  | 6.433963  | Prdm16        | NM_027504    | Prdm16           |
| 1429088_at   | 0.97650486 | 10.186106 | 0.9036212  | 10.074197  | 0.74854845 | 9.802574  | 0.6219333  | 9.535239  | Lbh           | NM_029999    | MG1:1925139      |
| 1437100_x_at | 0.98808706 | 9.427375  | 0.9589175  | 9.384144   | 0.8609622  | 9.228687  | 0.61670023 | 8.747307  | Pim3          | NM_145478    | Pim3             |
| 1450268_at   | 1.0559357  | 6.328973  | 0.8901678  | 6.0826     | 1.118068   | 6.411459  | 0.6130446  | 5.5445147 | Figl          | NM_021716    | Figl             |
| 1425436_x_at | 1.0145019  | 6.619301  | 0.7997238  | 6.276103   | 0.89255166 | 6.4345365 | 0.60984874 | 5.885053  | Klra3         | NM_010648    | Klra3            |
| 1418665_at   | 1.0248964  | 6.8783097 | 0.84037614 | 6.591939   | 0.9127925  | 6.7111907 | 0.6057509  | 6.119628  | Impa2         | NM_053261    | Impa2            |
| 1428562_at   | 0.91369003 | 6.4332457 | 0.73521847 | 6.1197143  | 0.86534405 | 6.354815  | 0.6050473  | 5.8385887 | 2210403K04Rik | AK008813     | 2210403K04Rik    |
| 1418174_at   | 1.082549   | 9.230486  | 0.93848264 | 9.024455   | 1.0786418  | 9.225269  | 0.6049257  | 8.3908825 | Dbp           | NM_016974    | Dbp              |
| 1450184_s_at | 1.0576618  | 6.866341  | 0.86927164 | 6.583342   | 0.7712405  | 6.4107156 | 0.6044607  | 6.059184  | Tef           | NM_017376    | Tef              |
| 1438211_s_at | 1.0962085  | 10.00588  | 0.9385413  | 9.78185    | 1.1200128  | 10.036873 | 0.59994173 | 9.136252  | Dbp           | NM_016974    | Dbp              |
| 1447806_s_at | 1.041075   | 8.912165  | 0.8504755  | 8.620432   | 0.8447288  | 8.610651  | 0.596706   | 8.109182  | Stk23         | NM_019684    | Stk23            |
| 1423071_x_at | 0.99860835 | 10.961325 | 0.85838443 | 10.743031  | 0.80072045 | 10.642706 | 0.591223   | 10.205109 | 6720475J19Rik | NM_008397    | LOC270335 /// L  |
| 1416129_at   | 1.0102714  | 8.400547  | 0.8521608  | 8.155001   | 0.89451855 | 8.224987  | 0.5881347  | 7.620022  | Errf1         | NM_133753    | Errf1            |
| 1418697_at   | 1.1023692  | 7.5532427 | 0.9320751  | 7.311153   | 1.2314385  | 7.71298   | 0.58727694 | 6.6447477 | lnmt          | NM_009349    | lnmt             |
| 1456640_at   | 1.014367   | 7.974216  | 0.91971916 | 7.8329015  | 0.80723137 | 7.6446905 | 0.5844286  | 7.1787353 | Sh3rf2        | NM_172966    | Sh3rf2           |
| 1435445_at   | 0.9470189  | 6.2764125 | 0.81921434 | 6.0672603  | 0.78385544 | 6.003607  | 0.58419275 | 5.579464  | Ccnt2         | NM_028399    | Ccnt2            |
| 1426726_at   | 1.0205449  | 6.5367913 | 0.8785441  | 6.3206387  | 0.8662542  | 6.3003144 | 0.5838322  | 5.7310777 | Ppp1r10       | NM_175934    | Ppp1r10 /// LOC! |
| 1433837_at   | 0.9856974  | 9.191169  | 0.8338158  | 8.949753   | 0.7981683  | 8.886717  | 0.5785272  | 8.422409  | 8430408G22Rik | NM_145980    | 8430408G22Rik    |
| 1426727_s_at | 1.0231166  | 6.9263883 | 0.9258241  | 6.7822275  | 0.9194965  | 6.7723336 | 0.5742217  | 6.0930967 | Ppp1r10       | NM_175934    | Ppp1r10 /// LOC! |
| 1449851_at   | 1.0069072  | 7.340962  | 0.89821    | 7.1761556  | 0.8242173  | 7.0521274 | 0.5642061  | 6.5053253 | Per1          | NM_011065    | Per1             |
| 1418148_at   | 1.0277765  | 8.468097  | 0.8110521  | 8.126436   | 0.85356164 | 8.200137  | 0.5623402  | 7.598086  | Abhd1         | NM_021304    | Abhd1            |
| 1428306_at   | 0.9763866  | 7.855531  | 1.0026221  | 7.8937845  | 0.79842937 | 7.5652437 | 0.52441317 | 6.9587827 | Ddit4         | NM_029083    | Ddit4            |
| 1434008_at   | 0.96751475 | 7.6327763 | 0.98043454 | 7.651914   | 0.7331669  | 7.2326345 | 0.51380146 | 6.7197037 | Scn4b         | NM_001013390 | Scn4b            |
| 1422697_s_at | 0.93932134 | 6.580415  | 0.85756207 | 6.4490366  | 0.77656424 | 6.305901  | 0.5099944  | 5.699277  | Jarid2        | NM_021878    | Jarid2           |
| 1429809_at   | 0.9798974  | 5.888345  | 0.955312   | 5.8516865  | 0.70937216 | 5.4222574 | 0.48629805 | 4.8775554 | 8430438D04Rik | NM_177368    | 8430438D04Rik    |
| 1436521_at   | 0.9744357  | 7.4626994 | 0.8934934  | 7.3375893  | 0.7590269  | 7.1022835 | 0.44520745 | 6.33261   | Slc36a2       | NM_153170    | Slc36a2          |
| 1449434_at   | 0.97625434 | 7.0005226 | 1.1501411  | 7.2370043  | 0.785493   | 6.6868644 | 0.38826486 | 5.6703067 | Car3          | NM_007606    | Car3             |
| 1445764_at   | 1.013237   | 6.808127  | 0.6514278  | 6.1708326  | 0.7207284  | 6.316683  | 0.38203576 | 5.400935  | AK085771      | ---          | ---              |
| 1449065_at   | 1.0782526  | 6.7438154 | 0.78757995 | 6.290619   | 0.7735566  | 6.264699  | 0.37494877 | 5.219886  | Acot1         | NM_012006    | Acot1            |
| 1416755_at   | 1.008003   | 9.226593  | 0.85927755 | 8.996289   | 0.7836994  | 8.863465  | 0.36334723 | 7.7545133 | Dnajb1        | NM_018808    | Dnajb1           |
