# Supplementary material
Source: PubMed Central journal article supplement (PMC2536824)

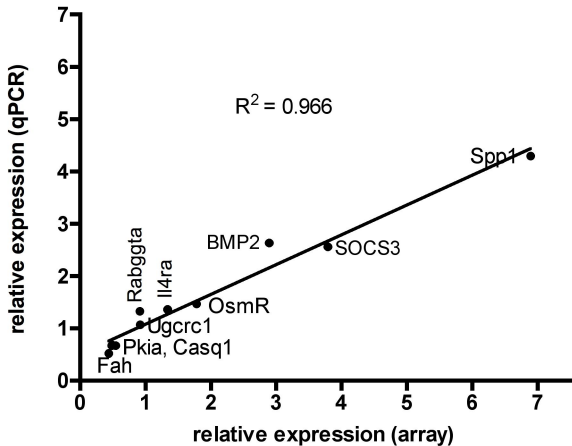

Supplement: 90225.2008_1.pdf [file 90225.2008_1.pdf]
